# Supplementary material
Source: PubMed Central journal article supplement (PMC7568312)
Supplement: pnas.2004596117.sapp.pdf [file pnas.2004596117.sapp.pdf]

1 Title: Organic Matter from the Chicxulub Crater Exacerbated the K-Pg Impact Winter  
2 Author Line: Shelby L. Lyons\*<sup>1</sup>, Allison T. Karp<sup>1</sup>, Timothy Bralower<sup>1</sup>, Kliti Grice<sup>2</sup>, Bettina  
3 Schaefer<sup>2</sup>, Sean Gulick<sup>3,4</sup>, Joanna Morgans<sup>5</sup>, Katherine H. Freeman<sup>1</sup>

4  
5 Author Affiliation:

6 <sup>1</sup>Department of Geosciences, The Pennsylvania State University, University Park, PA, USA  
7 16802

8 <sup>2</sup>Western Australia Organic & Isotope Geochemistry Centre, School of Earth and Planetary  
9 Sciences, The Institute for Geoscience Research, Curtin University, Perth, WA, Australia

10 <sup>3</sup>Institute for Geophysics & Department of Geological Sciences, University of Texas at Austin,  
11 Austin, TX, USA

12 <sup>4</sup>Center for Planetary Systems Habitability, University of Texas at Austin, Austin, TX, USA

13 <sup>5</sup>Department of Earth Science & Engineering, Imperial College London, London, UK  
14

15 **Supplemental Information**

16  
17 **1. Site Descriptions**

18  
19 Site M0077A Chicxulub Basin

20  
21 Sediment and rock from the peak ring of the Chicxulub impact crater were recovered on IODP-  
22 ICDP Expedition 364 and divided into four sections (1). Material for this study was collected  
23 from the 111.63 m thick “Unit 1” which contains post impact sediments (2). Underlying Unit 1 is  
24 a 104.28 m section of suevite (“Unit 2”), below which is a 25.41 m section of melt rock with  
25 clasts (“Unit 3”), and a section of shocked granitic target rock (“Unit 4”) (2). Unit 1, the  
26 sedimentary unit, is split into seven sections (1A – 1G), of which the two lowermost sections (1F  
27 & 1G) were of interest in this study, as they contain the first sedimentation of the Cenozoic.  
28 Transitional Unit 1G (Section 007 – 40R – 1, 34-108 cm / 616.58 - 617.33 mbsf) is identified as  
29 the K-Pg boundary layer and was deposited via seiche waves and settling. Unit 1G contains a  
30 thinly laminated, dark gray-brown micritic limestone from the base (Section 007 – 40R – 1, 67-  
31 108cm / 616.91 – 617.33 mbsf) with abundant charcoal in the lowermost section (Section 007 –  
32 40R – 1, 103-108 cm / 617.28 – 617.33 mbsf), above which is a unit identified as a slumped  
33 interval or homogenized interval (Section 007 – 40R – 1, 54 – 67 cm / 616.78 – 616.91 mbsf)  
34 (2). Above the slumped interval is a relatively more homogenized micritic limestone (Section  
35 007 – 40R – 1, 34-54 cm / 616.58 – 616.78 mbsf) that contains distinct trace fossils of *Planolites*  
36 and *Chondrites*, which provide evidence for the return of benthic life within the crater The  
37 deposition of the transitional unit occurred within months (2) of the impact.  
38

39 Unit 1F, the first sedimentation of the Paleogene, lies above the transitional unit. Above the  
40 transitional unit is a green-gray claystone (Section 007 – 40R – 1, 29-34 cm / 616.53 – 616.58  
41 mbsf) containing the Iridium spike, abundant charcoal, foraminifera, and increasing shell  
42 fragments (2–4) and a relative maxima in PAH concentrations. Charcoal in the claystone has  
43 been interpreted as either airfall or reworked, washed in, or bioturbated material from the lower  
44 charcoal unit (Section 007 – 40R – 1, 103-108 cm / 617.28 – 617.33 mbsf) (2). Deposition of the  
45 green marl occurred between < 6 years and 30,000 years following the impact (5) (see Lowery *et al.*  
46 *al.*, 2018 and Gulick *et al.*, 2019 for further discussion of timing).

47  
48 Overlying the green marl is a white pelagic carbonate, with less reworked material upsection (5).  
49 Samples from the Danian carbonate were obtained between Section 007 – 40R – 1, 10 – 34 cm /  
50 616.34 – 616.68 mbsf. For additional discussion of the deposition of the Transitional Unit and  
51 the Danian pelagic carbonate, as well as what these units represent, see Gulick *et al.*, 2019,  
52 Lowery *et al.*, 2018, and Bralower *et al.*, 2020 (**Supplemental Figure S1**).

53  
54 Site 738, Kerguelen Plateau

55  
56 Samples from the Indian Ocean Kerguelen Plateau Site 738 were obtained between 738C-20R-5  
57 8 – 98 cm / 376.39 – 377.19 mbsf. Below 97.5 cm in section 738C-20R-5 (377.185 m) is a white,  
58 bioturbated limestone, above which is a laminated chalk (738C-20R-5 96.2 – 97 cm / 377.172 –  
59 377.18 mbsf), overlain by a 3 mm laminated gray clay containing the Iridium anomaly (738C-  
60 20R-5 95.9 – 96.2 cm / 377.169 – 377.172 mbsf) (3, 6). Above the gray clay is a semi-indurated,  
61 12 cm sequence of finely laminated white and green clay layers (738C-20R-5 82.5 – 95.9 cm /  
62 377.035 – 377.169 mbsf) containing elevated PAH concentrations. Overlying the laminated clays  
63 is a bioturbated light brown to white chalk (738C-20R-5 82.5 – 80.5 cm / 377.015 – 377.035  
64 mbsf), above (80.5 cm / 377.015 mbsf to top of core) which is a light green, semi indurated chalk  
65 with abundant darker burrows from *Zoophycos*, *Planolites*, and *Chondrites* (6). Micrite is  
66 abundant from the bottom of the core to 738C-20R-5 10 cm / 376.31 mbsf), and charcoal was  
67 observed below 738C-20R-5 97 cm (377.18 mbsf) (3). Thierstein *et al.* (1991) propose the  
68 sedimentation rate below the gray clay (below 738C-20R-5 96.2 cm / 377.172 mbsf) was 2.88  
69 cm/kyr, above the gray clay between 70.9 – 95.9 cm / (376.919 – 377.169 mbsf) dropped to 0.2  
70 cm / kyr, above which (738C-20R-5 70.9 cm / 376.919 cm and above) the sedimentation rate  
71 increased to 0.9 cm/kyr. The boundary section is described above, and the boundary depth is  
72 identified as the gray clay at 95.9 cm, where the Iridium spike occurs. Cretaceous calcareous  
73 nannoplankton and planktonic foraminifera are observed above the boundary and are interpreted  
74 as winnowing of sediment, as lamination suggests bioturbation was limited (7–10) For additional  
75 discussion of the deposition of K-Pg boundary sediments at Site 738, see Bralower *et al.* (2020),  
76 and for timing, core description, and images, see Thierstein *et al.*, 1991 (**Supplemental Figure**  
77 **S2**).

78  
79 Site 1262, Walvis Ridge

80  
81 Samples from the South Atlantic Ocean Site 1262 were obtained from Section 1262B-22H-4  
82 between 1 and 148 cm (194.18 – 195.64 mbsf). The K-Pg boundary lies within Section 1262B-  
83 22H-4 at 137 cm (195.59 mbsf). Below 137 cm (195.59 mbsf) is a tan – light pink clay rich  
84 Cretaceous ooze, which is overlain by Paleocene brown clays. The boundary interval is highly  
85 bioturbated and should be seen as gradational (3, 11) and is largely determined based on  
86 biostratigraphy. There has not been an identified Iridium anomaly at 1262 to date, but an osmium  
87 isotope anomaly spanning 115 cm of this core has been identified(11,  
88 12)(12)(12)(12)(12)(12). The micrite layer occurs between 1262B-22H-4 75 – 139 cm  
89 (194.97 - 195.61 mbsf), and micrite decreases in abundance up to 1262B-22H-4 30 cm (194.52  
90 mbsf) (3). Plant material and possibly charcoal were observed between 1262B-22H-4 133 – 136  
91 cm (195.55 – 195.58). The records, including the osmium isotope anomaly, are smeared below  
92 the boundary, likely as a result of bioturbation (12). For additional information on Site 1262, see

93 Zachos *et al.*, 2004, Ravizza & VonderHaar, 2012, and Bralower *et al.*, 2020 (**Supplemental**  
94 **Figure S3**).

95

## 96 **2. Global observations of fire markers in K-Pg boundary sections**

97

98 Fire markers have been observed globally in K-Pg boundary records (Figure 1, main text),  
99 though their sources may be more complex than previously interpreted. Burn markers from the  
100 impact may differ from those observed in modern burns due to high temperatures, thermal  
101 radiation (13), potential asteroid-derived hydrocarbons (14), target-rock derived hydrocarbons  
102 (15, 16), ejection of material to the upper atmosphere, and re-entry of ejecta to Earth's surface  
103 (17).

104

105 PAHs have been identified as burn markers in many K-Pg records, but have multiple sources,  
106 atypical formation processes, and are affected by transport, which may complicate previous  
107 interpretations. For example, in K-Pg studies, the presence of coronene has separately been used  
108 as evidence for to the pyrolysis of organic matter from the target-rock (18, 19) and the  
109 occurrence of high temperature wildfires (20) following the Chicxulub impact. In multiple  
110 Northern Hemisphere sites including Chicxulub (*Supplemental Figure S5*), Caravaca, Spain (19),  
111 Stevns Klint, Denmark (20), Beloc, Haiti (21), and Gubbio, Italy (20), coronene is the most  
112 abundant parent PAH. Large, pericondensed PAHs including coronene can be linked to high  
113 temperature burns (22), proximity to a point source, biodegradation (23), weathering, and  
114 hydrothermal sources (24–26). Although coronene abundance has been the crux of multiple K-  
115 Pg burn marker studies (19–21), this compound cannot be definitively linked a fuel source, or to  
116 burning at all. Previous studies have also argued for wildfires based on the presence of retene in  
117 K-Pg boundary sections (27), though fossil biomass combustion, diagenesis of pimaric and  
118 abietic acids (18, 28), and weathering of sediments containing retene are non-negligible potential  
119 sources. Many previous K-Pg studies have interpreted non-diagnostic PAHs as evidence for  
120 wildfires or target-rock heating.

121

122 Below is a further review of observations made at sites with fire markers (the sites marked in  
123 Figure 1, main text). Many sites in which the presence of soot, PAHs, or fullerenes were linked  
124 to wildfires present evidence that is not a “smoking gun” for a fuel source, but rather can be  
125 related to the combustion or pyrolysis of biomass and/or hydrocarbons.

126

### 127 Site M0077A, Chicxulub Impact Crater

128

129 The Chicxulub peak ring Site M0077 contains charcoal at the base of the transitional unit and  
130 within the green marl capping the transitional unit (2). The lower charcoal layer is interpreted as  
131 primarily delivered from coastlines ~800 km away into the crater, and the upper charcoal layer is  
132 interpreted as either airfall from atmospheric fallout or from fires years after the impact (2).  
133 PAHs observed at Chicxulub reach their highest concentrations at the base of the transitional unit  
134 and remain elevated through the entire transitional unit. PAH composition is dominated by  
135 alkylated forms of PAHs relative to parent PAHs and dominated by kinetic isomers relative to  
136 thermodynamic isomers (see main text). Coronene is the most abundant PAH at Site M0077  
137 within the boundary interval (below 616.58 mbsf / Section 007 – 40R – 1 34 cm), and PAH  
138 distributions are dominated by larger (>4 rings) species. Retene concentrations are low compared

139 to other PAHs, and do not covary with the major changes in PAH concentration. We suggest  
140 retene is likely from background inputs of biomass burning, but not necessarily the main source  
141 of PAHs. The PAH composition at Site M0077 is consistent with the burning of petrogenic  
142 carbon, which we interpret as target-rock derived. PAH concentrations for Site M0077 can be  
143 observed in **Supplemental Dataset 1, Supplemental Figure S4, and Supplemental Figure S5.**

144

#### 145 Site 738, Kerguelen Plateau

146

147 Charcoal was observed within K-Pg boundary sediments at Site 738 between 738C-20R-5 97 –  
148 106 cm (377.18 – 377.27 mbsf) (3), within the section of impact-related sediments (below 738C-  
149 20R-5 82.5 cm / 377.035 mbsf). PAH concentrations for most compounds are highest within the  
150 post-impact deposits (below 377.035 mbsf) (**Supplemental Figure S6**). The most abundant  
151 compounds are Chrysene (C0) and Benzo[ghi]perylene (GHI). The PAH spike at 87 cm (377.08  
152 mbsf) within the laminated part of the boundary unit coincides with a major increase in most of  
153 the larger individual PAHs, including perylene (PER). Coronene is below detection limits in all  
154 samples. We attribute the lack of coronene to the distance from the crater itself or transport phase  
155 of coronene (i.e. not a major PAH component in the plume), as it is the least prone species to  
156 transport (see Supplemental Dataset 5). PAHs within the boundary interval are dominated by the  
157 kinetically favored relative to the thermodynamically favored isomer (**Supplemental Figure S7**)  
158 indicating a quick, high temperature formation process. Alkylation ratios at the PAH spike and  
159 above shift towards more petrogenic, alkylated signatures (main text Figure 2). We take the  
160 lowermost three samples (94 – 98 cm / 377.15 - 377.19 mbsf) with parent-dominated, pyrogenic  
161 signatures to indicate a pre-existing, dominant fire regime that has previously been identified on  
162 the Indian subcontinent leading up to the boundary (29). The samples between 94 – 98 cm /  
163 377.15 - 377.19 mbsf have lower concentrations of PAHs than the K-Pg boundary spike.  
164 Volcanic activity and a fire regime relating to the Deccan Traps is hypothesized as a driving  
165 mechanism for the wildfire-derived PAHs on nearest landmass. We postulate that Site 738  
166 contains both a pre-existing record of a fire regime related to wildfires, possibly driven by  
167 volcanism, at Site 738, overprinted by the signature of fossil carbon burning at the impact site  
168 from the Chicxulub impact, which we tie to the PAH spike around 377.08 mbsf. Retene  
169 concentrations do not covary with the PAH spike, and we tie retene abundance to a background  
170 fire regime, not deposition of material related to the impact itself.

171

#### 172 Site 1262, Walvis Ridge

173

174 Bralower *et al.* (2020) recently documented the presence of disperse charcoal at Site 1262 (3).  
175 PAH concentrations at Site 1262 reach their highest values within impact sediments (main text,  
176 Figure 1) and reach maximums for most compounds within the bioturbated boundary sequence  
177 (**Supplemental Figure S8**). Most PAHs reach maximum values coincident with the PAH spike  
178 associated with the K-Pg boundary at 142 – 148 cm (195.58 – 195.64 mbsf). Chrysene (C0) is  
179 the most abundant PAH associated with the boundary, closely followed by Fluoranthene (FL0),  
180 Benz[a]anthracene (BaA), Pyrene (PY0), and Phenanthrene (P0). Perylene and retene both spike  
181 concordantly with all other PAHs. While PAH alkylation patterns at the K-Pg boundary PAH  
182 spike are consistent with a petrogenic source (see main text Figure 1), the dominant parent PAHs  
183 are the kinetically favored over thermodynamically favored forms (**Supplemental Figure S9**),  
184 indicating a quick, high temperature process such as combustion or pyrolysis. We link the PAH

185 signatures within the PAH spike at the K-Pg boundary to material from the target rock released  
186 and heated upon impact. We suggest a background fire regime contributed to the fire marker  
187 makeup at Site 1262.

188  
189 MEG: Meghalaya, India

190  
191 *Pal et al.* (2015) detailed the PAH spike below and coincident with the K-Pg boundary at the Um  
192 Sohryngkew River section of the K-Pg boundary. For site descriptions and an in-depth analysis  
193 of PAHs from the Indian subcontinent across the K-Pg boundary, refer to *Pal et al.*, 2015. In the  
194 Meghalaya section, associated with biozone CF3 (66.83 – 65.45 Ma) is a 2 mm thick clay layer  
195 with which hosts an increase in PAH concentration. The most abundant PAHs observed at this  
196 site include the 4-ringed species: fluoranthene, pyrene, chrysene, and benz[a]anthracene. Above  
197 the initial PAH spike in biozone CF2 is an abundance of alkylated phenanthrenes. *Pal et al.* link  
198 the abundance of 4-ringed PAHs in biozone CF3 to either fire following the K-Pg impact, or fire  
199 associated with the Deccan volcanic activity (29). Kinetically favored isomers dominate within  
200 the PAH spike, leading the authors to associate the PAH spike with fires following either the  
201 impact itself or Deccan activity. Interestingly, biozone CF2 includes spherules typical of K-Pg  
202 boundary sediments, and has petrogenic methylphenanthrene / phenanthrene signatures, but  
203 mixed to kinetically favored fluoranthene / pyrene and phenanthrene / anthracene ratios (29). We  
204 assert that the kinetically favored PAH isomer ratios and pyrogenic alkylation signatures at this  
205 site represent the pre-impact fires. We suggest the above lying spherule layer with kinetically  
206 favored isomers and abundance of alkylated PAHs is more consistent with a heated petrogenic  
207 source (29) in biozone CF2. We suggest the layer with elevated PAH concentrations represents  
208 fallout or reworked K-Pg impact material on top of a background fire record.

209  
210 CAR: Caravaca, Spain

211  
212 The Caravaca, Spain K-Pg section has been analyzed in multiple prior studies, which cite a PAH  
213 spike associated with the boundary (19) and elevated concentrations of soot/charcoal (27, 30,  
214 31). At Caravaca, *Arinobu et al.* (1999) documented a PAH spike and negative carbon isotope  
215 excursion associated with the K-Pg boundary interval. The boundary clay is enriched 112 – 154  
216 fold in PAHs, notably coronene, benzo[ghi]perylene, and benzo[e]pyrene, which the authors  
217 associate with a pyrogenic origin (19). The carbon isotope excursion and spike in PAHs, notably  
218 the large, pericondensed forms mentioned above, led the authors to cite global wildfires  
219 combusting 18-24% of the terrestrial biosphere as the source of the isotopic excursion and PAHs  
220 (19). Because large, pericondensed species, such as coronene, can be formed can be linked to  
221 high temperature burns (22), proximity to a point source, biodegradation (23), weathering, and  
222 hydrothermal sources (24–26), we suggest *Arinobu et al.* (1999) present PAH data that cannot be  
223 tied to a fuel source, contrary to their interpretations. *Gilmour et al.* note 14% of carbon in the K-  
224 Pg boundary sediments was in the form of soot (27). Additionally, K-Pg boundary sediments  
225 were analyzed by *Wolbach et al.*, (1985 & 1988), in which the authors identify an increase in  
226 elemental carbon to 0.010 g/cm<sup>3</sup> with an  $\delta^{13}\text{C}$  value of -25.00‰. From the abundance of soot at  
227 global sites, the authors cite  $7 \times 10^{16}$  g of soot released from wildfires following the impact (31).

228  
229 KLI: Stevns Klint, Denmark

230

231 Stevns Klint, Denmark K-Pg boundary sediments have previously been worked on by  
232 Venkatesan & Dahl (1989), Wolbach *et al.* (1985, 1988), Gilmour *et al.* (1990), and Harvey *et*  
233 *al.* (2008). Venkatesan & Dahl (1989) noted a PAH spike coincident with the K-Pg boundary  
234 interval (30 ppb) coincident with the iridium anomaly. Coronene is the most abundant PAH at  
235 Stevns Klint. Due to the decreasing concentration of phenanthrenes (and anthracenes) and  
236 fluoranthenes (and pyrenes), with increasing alkylation, the authors link the PAH spike to  
237 wildfires following the K-Pg impact (20). Wolbach *et al.* (1988) identified 0.011 g/cm<sup>3</sup> of  
238 elemental carbon (soot) with a  $\delta_{13}\text{C}$  value of -25.81‰ at the K-Pg boundary. Stevns Klint was  
239 used by Wolbach *et al.* (1988) to calculate  $7 \times 10^{16}$  g of soot released by wildfires following the  
240 impact (31). Based on the isotopic similarity to other sites, Wolbach *et al.* (1988) link the soot  
241 observed in Stevns Klint to wildfires. Gilmour *et al.*, note that soot accounts for 21% of carbon  
242 observed at Stevns Klint (27). While the earlier studies suggest PAHs and soot are derived from  
243 wildfires, Harvey *et al.* (2008) described the presence of carbon cenospheres, material derived  
244 from the burning of oils or concentrated petrogenic carbon, and linked their abundance with the  
245 burning of the target rock at Chicxulub (16). At Stevns Klint, 646 cenospheres of 5.1  $\mu\text{m}$   
246 diameter per gram of rock and 150 cenospheres of 8.5  $\mu\text{m}$  diameter were observed in the fireball  
247 layer and other K-Pg sediments respectively (16). To produce the global abundances of  
248 cenospheres, which Harvey *et al.* (2008) predicted the global inventory of  $2.3 \times 10^{12}$  g would  
249 require the combustion of  $9.2 \times 10^{16}$  g of carbon (16). Harvey *et al.* (2008) link the carbon-related  
250 anomalies at Stevns Klint to the combustion of the Chicxulub target rock upon impact, whereas  
251 Venkatesan & Dahl (1989), Wolbach *et al.* (1985, 1988), and Gilmour *et al.* (1990) link K-Pg  
252 carbon anomalies at Stevns Klint to wildfires. None of the evidence presented is conclusive for a  
253 single source, but rather, seems to imply the input of both burned petrogenic and wildfire-derived  
254 carbon.

255

256 GUB: Gubbio, Italy

257

258 The debate over whether wildfires or burning of a target rock following the Chicxulub impact  
259 has previously been invoked at Gubbio, Italy by Venkatesan & Dahl (1989), Wolbach *et al.*  
260 (1988), and Gilmour *et al.* (1990). Venkatesan & Dahl (1989) noted a PAH spike over 75 times  
261 background levels associated with the iridium anomaly at Gubbio. Coronene, a pericondensed, 7  
262 ring PAH, is the most abundant PAH at the K-Pg boundary at Gubbio. The set of selected PAHs  
263 was most abundant in the non-alkylated parent form, leading the authors to link K-Pg PAHs to  
264 wildfires. There is no background (pre- or post- boundary) data presented within this study to  
265 compare with the boundary interval (20). Wolbach *et al.* (1988) reported 0.013 g/cm<sup>3</sup> of  
266 elemental carbon with a  $\delta_{13}\text{C}$  value of -25.48‰ at Gubbio, which is similar to the concentrations  
267 and isotopic values of elemental carbon observed at other sites, leading the authors to link the  
268 presence of soot to wildfires (31). Gilmour *et al.* report that soot makes up for 17% of the carbon  
269 in K-Pg boundary sediments, which they relate to wildfires (27). Venkatesan & Dahl (1989),  
270 Wolbach *et al.* (1988), and Gilmour *et al.* (1990) made a case for wildfires based on carbon  
271 anomalies at the K-Pg boundary. The data presented suggests a wildfire regime but is  
272 inconclusive in ruling in or out additional sources.

273

274 WOO: Woodside Creek; New Zealand

275

276 The debate over the source of anomalous K-Pg boundary carbon at Woodside Creek, New  
277 Zealand has previously been discussed by Venkatesan & Dahl (1989), Wolbach *et al.* (1985,  
278 1988), Gilmour *et al.* (1990), Heymann *et al.* (1994), and Harvey *et al.* (2008). Venkatesan &  
279 Dahl noted a PAH spike 11 times above background levels dominated by low molecular weight  
280 PAHs and relatively devoid of high molecular weight, pericondensed forms such as coronene  
281 (20). We hypothesize the PAH size distribution is related to transport, as this site is one of the  
282 furthest from the impact crater itself, similar to the PAH composition at Site 738. Woodside  
283 Creek demonstrates a dominance of the di-methylated PAHs, and presents a signature similar to  
284 petroleum (20), which the authors relate to a combustion source from moderate to high  
285 temperature fires (400 – 800 °C) (20). The interpretation of di-methylated PAHs being sourced  
286 from fires is likely a misinterpretation, and rather suggests a petrogenic source of carbon (32).  
287 Wolbach *et al.* (1985, 1988) noted a heightened abundance of soot (black carbon) at Woodside  
288 Creek, amounting to 0.0048 g/cm<sup>3</sup> with a  $\delta_{13}C$  value of -25.42‰ (30, 31). Gilmour *et al.* (1990)  
289 report that 69% of carbon at Woodside Creek is soot, linking the abundance of soot to wildfires  
290 following the Chicxulub impact (27). Heymann *et al.* (1994) reported the presence of fullerenes  
291 in the K-Pg boundary sediments at Woodside Creek. The C<sub>60</sub> fullerene was 0.1 – 0.2 ppm of the  
292 associated soot, which the authors associate with temperature fires (> 1000 °C). The  
293 concentration of fullerenes was two to three orders of magnitude above background  
294 concentrations. Fullerenes, including a C<sub>70</sub> fullerene, were also observed at the nearby  
295 Flaxbourne River site (33). The authors hypothesize fullerenes were derived from wildfires set  
296 off by the Chicxulub impact (33), though these temperatures were likely not sustained in regional  
297 fires outside of the impact site (34). Fullerenes can also be produced by the burning of petrogenic  
298 carbon, and temperatures upon impact exceeded the temperature of fullerene generation (35).  
299 Harvey *et al.* (2008) observed carbon cenospheres at Woodside Creek (4994 cenospheres with  
300 6.1  $\mu$ m diameter per gram sediment), which they take as evidence for the dispersal and heating  
301 of crustal material from the Chicxulub target rock (16). There is a lack of consensus about the  
302 source of anomalous carbon (fullerenes, PAHs, carbon cenospheres, and soot) at Woodside  
303 Creek, NZ.

304  
305 HOK: Kawaruppu, Hokkaido, Japan

306  
307 Mita & Shimoyama (1999) documented a PAH spike associated with a K-Pg boundary claystone  
308 section in Hokkaido, Japan. Specifically, concentrations of 4 ringed and larger PAHs are  
309 elevated within the claystone (specifically within the bottom two thirds of the claystone) than  
310 above or below sediments. Parent PAH dominance over alkylated PAHs was assumed from the  
311 dominance of phenanthrene to alkylated homologues. Mono and dimethyl PAHs demonstrate a  $\beta$   
312 over  $\alpha$  isomer dominance. Phenanthrene abundance was greater than anthracene, and pyrene  
313 abundance was greater than chrysene, which the authors linked to the enhanced stability of  
314 pericondensed over linear PAHs, but not necessarily fires. The authors did not find sufficient  
315 evidence to link the PAH distributions to wildfires, but noted that a PAH spike at Kawaruppu  
316 was present (36).

317  
318 SAS: Saskatchewan, Canada (Rock Creek East & Wood Mountain Creek)

319  
320 In Figure 1 (main text), we use SAS to represent both the Rock Creek East and Wood Mountain  
321 Creek sites from Saskatchewan, Canada. Harvey *et al.* (2008) documented the presence of

322 carbon cenospheres at Rock Creek East, and Belcher *et al.* (2005) documented a decrease in  
323 charcoal abundance relative to Cretaceous and Paleogene rocks. Both studies cite heating of  
324 material from the Chicxulub target rock but not wildfires as the source of the carbon anomaly at  
325 the K-Pg boundary. Harvey *et al.* (2008) documented 83 carbon cenospheres with a 25.2  $\mu\text{m}$   
326 diameter per gram of rock within the ejecta layer and 875 carbon cenospheres with a 26.6  $\mu\text{m}$   
327 diameter in the fireball layer at Rock Creek East, Saskatchewan, Canada (16). The authors link  
328 the presence of carbon cenospheres to the heating of  $9.4 \times 10^{17}$  g crustal carbon at Chicxulub  
329 during the impact, positing that the carbon anomaly in K-Pg boundary sites can only be  
330 explained by high temperature alteration and dispersion of the thermally mature target rock, and  
331 not wildfires (16). Additionally, Belcher *et al.* (2005) performed charcoal analyses and reported  
332 that 99% of the K-Pg organic material is non-charred, whereas 94% of Cretaceous and 68% of  
333 Tertiary organic matter was non-charred (18). Because this site (and others used within Belcher  
334 *et al.* (2005)'s analyses) are near the Chicxulub crater, these should be the sites where wildfires  
335 occurred (34). Belcher *et al.* (2005)'s work demonstrates a decrease in the amount of charred  
336 material or an increase in the amount of unburned material within K-Pg boundary sediments,  
337 which contrasts the wildfire hypothesis (18). Taken together, Harvey *et al.* (2008) and Belcher *et al.*  
338 *et al.* (2005)'s work demonstrates evidence for the heating and dispersion of crustal organic matter  
339 but do not support global wildfires.

340

341 ADM: Arroyo de Mimbral, Mexico

342

343 Kruge *et al.* (1994) document a PAH spike and an elevated amount of fossil charcoal at the  
344 Arroyo de Mimbral, Mexico K-Pg section. Kruge *et al.* (1994) report that 70% of the organic  
345 material is semi charred plant material (semifusinite), 20% is charred plant tissue (pyrofusinite),  
346 and 10% is vitrinite. The reflectance of all three pools of macerals (average  $> 1.3\%$   $R_o$ ) is much  
347 higher than expected for the in situ thermal maturation expected for the low heat gradient and  
348 sample burial depth of  $< 1$  km (37). The high thermal maturity interpreted from the reflectance of  
349 macerals, the absence of liptinite, and the abundance of aromatic compounds led Kruge *et al.*  
350 (1994) to interpret the Arroyo de Mimbral deposit proximal to Chicxulub as the aftermath of a  
351 thermal pulse following the impact (37). The authors hypothesize that the "fossil charcoal," or  
352 organic macerals with greater interpreted thermal maturity from vitrinite reflectance than  
353 possible in the basin, was sourced from shock heating of nearby coastal vegetation, quenching,  
354 and transport to the 600 m deep ocean basin (37). We suggest an alternative explanation may be  
355 the burning of more thermally mature material from the target rock itself, or reworking of fossil  
356 charcoal on land during resurge. The presence of fossil charcoal alone cannot be definitively  
357 linked to source or generation process.

358

359 ND: Mud Buttes, North Dakota, USA

360

361 Belcher *et al.* (2009) present an analysis of charred and non-charred plant remains as well as  
362 PAHs from K-Pg boundary sections from the Western Interior Seaway Mud Buttes site in North  
363 Dakota, USA. A spike in parent PAHs is observed, and is dominated by small, 3-4 ringed  
364 compounds. Belcher *et al.* (2009) argue that the appearance of a PAH spike lower (earlier in the  
365 record) in K-Pg boundary sequences in sites more proximal to the Chicxulub impact crater and,  
366 the appearance of a PAH spike higher (later in the record) in more northern, more distal K-Pg  
367 boundary sites (including ND) is evidence for Chicxulub as the source of hydrocarbons. Based



368 on a cluster analysis of K-Pg impact deposits and possible sources, Belcher *et al.* (2009) argue  
369 that the clustering of K-Pg boundary PAH compositions with combusted fossil fuels, and not  
370 with combusted biomass, links the PAHs at the boundary to the combustion of fossil  
371 hydrocarbons from the Chicxulub target rock (38). The fireball layer at ND, but not the ejecta  
372 layer, contains concentrations of parent PAHs exceeding background levels, and charcoal  
373 abundances 20 times lower than background levels (38). Ultimately, Belcher *et al.* (2009) link  
374 the low charcoal abundances and elevated, petrogenic PAH signature at ND to the combustion of  
375 hydrocarbons at the impact site, and not to wildfires.

376

377 CO: Colorado, USA (Madrid East South, Clear Creek North, & Berwind Canyon)

378

379 Belcher *et al.* (2009) present an analysis of charred and non-charred plant remains and parent  
380 PAHs from K-Pg boundary sections from the Western Interior Seaway sites in Colorado, USA:  
381 Madrid East South, Clear Creek North, and Berwind Canyon. These are the three most proximal  
382 sites to the Chicxulub impact crater used in Belcher *et al.*'s 2009 study. Belcher *et al.* identify a  
383 PAH spike at each site in the lower portion of the boundary impact sediments, which they relate  
384 to the proximity to the impact site. The ejecta and fireball layers at all 3 CO sites are above  
385 background levels, and all display a "hydrocarbon" signature. PAHs that dominate the  
386 composition in CO sites include 3 and 4 ringed species. Cluster analysis of PAH compositions at  
387 each site and possible sources demonstrate a clustering of boundary PAH compositions with  
388 those of combusted hydrocarbons, leading the authors to conclude that hydrocarbon combustion  
389 at the impact site was the source of parent PAHs in western interior seaway sites, and not  
390 wildfires. The CO sites are >2,300 km from the impact site, and would possibly have been  
391 affected by the thermal pulse, but show a decrease in charred plant remains by a factor of 20  
392 coincident with the K-Pg boundary layer (38). Belcher *et al.* (2009) link the low charcoal  
393 abundances and the elevated, petrogenic PAH signatures at CO sites to the combustion of  
394 hydrocarbons at the impact site, not wildfires.

395

396 CR: Chancet Rocks, New Zealand

397

398 The Chancet Rocks, New Zealand K-Pg record was analyzed by Gilmour *et al.* (1990) and  
399 Wolbach *et al.* (1988), in which the authors cite the abundance of elemental carbon (soot) with a  
400 globally identical carbon isotopic signature to global wildfires following the impact at  
401 Chicxulub. At Chancet Rocks, black carbon is elevated (0.025 g / cm<sup>3</sup>), and has a  $\delta_{13}C$  value of -  
402 25.42‰. 23% of the carbon is in the form of soot, and soot is 600 times more concentrated than  
403 in Cretaceous sediments (27, 31). Both Wolbach *et al.* (1988) and Gilmour *et al.* (1990) cite  
404 wildfires as the source of elevated soot concentrations in K-Pg boundary intervals at Chancet  
405 Rocks, NZ due to its nearly identical values to PAHs at other globally dispersed sites. We  
406 suggest that the presence of identical soot could be from a single source (the target rock) and not  
407 only wildfires, though cannot distinguish the two sources based on the information presented for  
408 the Chancet Rocks site.

409

410 BEL: Beloc, Haiti

411

412 Kaiho *et al.* (2016) demonstrate an elevated abundance of PAHs, notably, coronene, at the Beloc,  
413 Haiti site proximal to the Chicxulub impact crater. PAH concentrations and coronene

414 concentrations peaked coincidentally with the iridium layers within the K-Pg boundary deposit at  
415 Beloc (39). Kaiho *et al.* (2016) suggest the elevated coronene / (coronene + benzo[e]pyrene +  
416 benzo[ghi]perylene) ratios are from petroleum combustion, whereas low values are more  
417 representative of biomass combustion. The low carbon preference index values in the K-Pg  
418 boundary interval were used to argue that the fuel source was older than the plants at the time of  
419 the impact, and further cite the Jurassic source rocks of the Cantarell oil field as a potential  
420 source (39). At Beloc, the  $\delta_{13}\text{C}$  values of *n*-alkanes decreased by 3-4%. Kaiho *et al.* (2016)  
421 conclude that the “burned material” observed in the K-Pg deposit at Beloc is sourced from fossil  
422 organic matter from the ejected crust at Chicxulub, and not wildfires. Further, we suggest the  
423 larger carbon isotope excursion at the proximal Beloc, Haiti site compared to the smaller carbon  
424 isotope excursion at the more distal Caravaca, Spain site (19) may be due to proximity to the  
425 impact site and amount of impact related material delivered to sediments at Beloc. Kaiho *et al.*  
426 (2016) estimated the total amount of soot ejected to the stratosphere using the concentrations of  
427 coronene, benzo[e]pyrene, and benzo[ghi]perylene, which they cite as components of soot (39).  
428 The authors estimated between 500 – 2600 Tg of black carbon was ejected to the stratosphere,  
429 which could have remained on the order of years, blocking out sunlight, inhibiting  
430 photosynthesis, and causing rapid cooling (39). Again, we note that the presence of  
431 pericondensed PAHs, such as coronene, cannot be linked to a fuel source.

432

433 BRZ: Brazos, Texas, USA

434

435 Heymann *et al.* (1998) detailed the anomalous carbon associated with the K-Pg boundary deposit  
436 at Brazos, Texas, USA and linked the presence of soot and fullerenes to wildfires. Soot in Brazos  
437 River sections increased to  $1.4 \times 10^4$  ppm and carbon concentrations increased to  $2.2 \times 10^4$  ppm  
438 in K-Pg boundary sections. The concentration of soot is 22 times higher than the global average  
439 reported at that time, which Heymann *et al.* (1998) link to Brazos’s proximity to the impact site.  
440 Fullerenes were also detected in the K-Pg sections at Brazos. Heymann *et al.* (1998) link the  
441 abundance of soot and the presence of fullerenes to high temperature wildfires in this proximal  
442 site following the K-Pg impact (40). Coupled with the reported increase in sulfur content at  
443 Brazos, which is likely from the target rock itself (40), we suggest the presence of fullerenes and  
444 soot may also have resulted from the release and burning of fossil hydrocarbons in the target  
445 rock at Chicxulub. With the data presented, the possible sources cannot actually be disentangled.

446

447 KEF: El Kef, Tunisia

448

449 Wolbach (1990) details the presence of soot at many K-Pg boundary sites, including the highly  
450 studied El Kef, Tunisia section. The El Kef section presents an elevated concentration of  
451 elemental carbon, similar to other sites, which is linked to the presence of wildfires (41). We  
452 note that soot itself is not capable of determining source.

453

454 AGO: Agost, Spain

455

456 Gilmour *et al.* (1990) and Wolbach (1990) report on the presence of elevated carbon and soot in  
457 the Agost, Spain K-Pg boundary section. At Agost, carbon concentrations reach 3.8 mg/g, of  
458 which about 2% is in the form of soot. No isotopic composition is reported for the soot, likely  
459 due to the relatively low concentrations compared to other sites. Gilmour *et al.* (1990)

460 hypothesize that the variable soot concentrations at boundary sites (i.e. the nearly 20 times higher  
461 concentration of soot at the nearby Caravaca, Spain site) as a function of the localized fallout of  
462 soot from the atmosphere controlled by rainfall (27, 41). While Gilmour *et al.* (1990) link the  
463 presence of localized soot to wildfires, the mechanism they cite (global fallout controlled by  
464 precipitation) is not wildfire specific, making the presence of soot not specifically related to  
465 wildfires, but rather, the combustion and transport processes, irrespective of carbon source.

466  
467 SUM: Sumbar, Turkmenistan

468  
469 Wolbach *et al.* (1990) report an increase in soot associated with the K-Pg boundary. Soot  
470 abundance increased 7 cm into the section, which was above the iridium anomaly at 0-1 cm into  
471 the boundary section (42). Soot may be linked to a heating process, but not a fuel source.

472  
473 FLA: Flaxbourne River, New Zealand

474  
475 Heymann *et al.* (1994) document the presence of fullerenes in K-Pg boundary sediments. The  
476 C<sub>60</sub> fullerene was 0.1 – 0.2 ppm of the associated soot, which the authors associate with  
477 temperatures above 1000 °C. The concentration of fullerenes was two to three orders of  
478 magnitude above background concentrations. C<sub>70</sub> fullerene was observed at Flaxbourne River  
479 (33). The authors hypothesize fullerenes were derived from wildfires set off by the Chicxulub  
480 impact (33), though temperatures over 1000 °C were not likely to have been sustained in regional  
481 fires outside of the impact site (34), making Heymann *et al.* (1994)'s interpretation of high  
482 temperature wildfires in one of the most distal sites from the crater questionable. We suggest the  
483 presence of fullerenes could have also been linked to high temperature reactions of fossil  
484 hydrocarbons in the target rock upon impact (T > 1465 °C) (35), ejection to the upper  
485 atmosphere, global dispersion within the dust cloud, and delivery via fallout or rainout.

486  
487 **3. Assessing sources of carbon at the K-Pg boundary: target rock, biomass, or bolide?**

488  
489 The fuel source that lead to the global abundance of soot, PAHs, and carbon cenospheres has  
490 previously been assessed using mass balance calculations. Below, we present additional mass  
491 balance calculations using the PAH abundance observed to assess whether the target rock,  
492 biomass, or a bolide could have delivered the PAH signature observed at the boundary. We offer  
493 no additional insight, as all sources present a sufficiently massive amount of material, making all  
494 sources possible from a mass balance perspective. From a mass balance perspective, none of the  
495 proposed sources are unreasonable explanations for the PAH concentrations observed at the K-  
496 Pg boundary.

497  
498 Harvey *et al.* (2008) assessed whether organic matter in the target rock would have been  
499 sufficient to drive the carbon cenosphere abundances in K-Pg boundary sediments. Based on the  
500 concentration of cenospheres at the example Woodside Creek, New Zealand (WOO) section,  
501 with a sediment density of 4.5 g/cm<sup>3</sup>, a cenosphere layer thickness of 0.6 cm, and a cenosphere  
502 concentration of 4994 cenospheres / g, Harvey *et al.* (2008) concluded the target rock at  
503 Chicxulub would have been a sufficient source of fuel to result in the observed cenosphere  
504 abundance (16), even if the target rock had an average crustal organic carbon composition. Using  
505 the mean cenosphere diameter (6.1 μm), and the mean carbon cenosphere density (0.28 g/cm<sup>3</sup>)

506 (43), Harvey *et al.* (2008) calculated a global cenosphere inventory of  $2.3 \times 10^{12}$  g in K-Pg  
507 boundary sediments. Harvey *et al.* (2008) calculated that  $7.6 \times 10^{16}$  g of dispersed organic  
508 material would be required to drive the cenosphere abundance if 0.003% of the burned organics  
509 would be transformed into cenospheres (44), which is less than the expected  $10^{17}$  g of C expected  
510 in the volume of Cretaceous rocks ejected (15). While Harvey *et al.* (2008)'s assessment of  
511 impact crater volume is incorrect (45) their assessment of carbon in the target rock is likely the  
512 correct order of magnitude (15).

513  
514 Gilmour *et al.* (1990) argue that biomass in a typical fire alone would not have produced  
515 sufficient elemental carbon unless the fraction of biomass converted to soot was elevated in post-  
516 impact fires, or if there was an additional fossil carbon source from the crater (27). Gilmour *et al.*  
517 (1990) attempted to explain the  $0.012$  g/cm<sup>2</sup> of soot at the K-Pg boundary through the  
518 combustion of the  $0.2$  g/cm<sup>2</sup> of above ground biomass (46) or the possible Cretaceous maximum  
519 value of  $0.6$  g/cm<sup>2</sup> using a soot yield calculation. The fraction of organic matter converted to soot  
520 is equal to the product of the fraction of biomass carbon burned, the fraction of burned biomass  
521 that is converted to smoke, the fraction of elemental carbon in smoke, and the above ground  
522 biomass concentration (27). Gilmour *et al.* (1990) determined that the concentration of soot in K-  
523 Pg boundary records was 12-18 times higher than the amount produced from a high intensity  
524 wildfire, which lead the authors to conclude that either multiple carbon sources need to be  
525 invoked or that soot production from post impact fires was greater than modern observations  
526 (27).

527  
528 Arinobu *et al.* (1999) used the presence of pericondensed PAHs and the negative carbon isotope  
529 excursion observed in K-Pg boundary sediments to argue for a burning of 18 – 24 % of  
530 aboveground biomass following the impact. Using the  $-1.4$  to  $-1.8\text{‰}$  shift in C<sub>29</sub> alkane  $\delta^{13}\text{C}$   
531 records as an indication of a  $-1.4$  to  $-1.8\text{‰}$  shift in atmospheric  $\delta^{13}\text{C}$ ,  $\sim 10^{18}$  g of above ground  
532 Cretaceous biomass, the end Cretaceous biomass value of  $-25.66\text{‰}$  (47), a burning efficiency of  
533  $\sim 50\%$ , and the end Cretaceous atmospheric  $\delta^{13}\text{C}$  value of  $-7.5\text{‰}$ , Arinobu *et al.* (1999)  
534 calculated that between 18 and 24% of above ground biomass would be needed to drive the  
535 observed carbon isotope excursion. Based on isotopic shifts across the K-Pg boundary, Arinobu  
536 *et al.* (1999) argue that biomass is more than sufficient to drive the geochemical shifts observed  
537 across the K-Pg boundary (19).

538  
539 Robertson *et al.* (2013) calculated that  $1.8 - 6.0 \times 10^{16}$  g of carbon would have been burned at  
540 the Chicxulub impact crater based crater area the global average concentration of organic carbon  
541 per area (45). Robertson *et al.* (2013) argue this amount of carbon would not have been enough  
542 to drive the observed soot abundance in boundary layers (Wolbach *et al.*, 1988; Robertson *et al.*,  
543 2013), whereas Kaiho *et al.* (2016) used this estimate to argue for enough soot to drive global  
544 darkness on the order of years (39). Alternately, Kenkmann *et al.* (2004) suggest that  $\sim 10^{17}$  g of  
545 organic carbon was present in the evacuated crater based on crater volume and the concentration  
546 of organic matter in nearby analogous Cretaceous sections from the Yax-1 corehole (15). The  
547 estimate of  $\sim 10^{17}$  g of organic carbon is discounted from the concentration of carbon in  
548 Cretaceous rocks at Yax-1, assuming 60% of the carbon in the Yax-1 core migrated into  
549 carbonates post-impact (15).

550

551 To assess whether PAHs at the K/Pg boundary are from wildfires (biomass), the bolide itself  
552 (meteoritic material), or the impact target rock (petrogenic / pyrolyzed petrogenic), we assessed  
553 whether there would be enough carbon in each reservoir to drive a PAH anomaly observed in  
554 this study (Sites M0077, 738, 1262).

555  
556 We first assessed whether the PAHs delivered by the bolide would be enough to drive a PAH  
557 anomaly either globally or within the Chicxulub impact deposits. First, in order to deliver an  
558 adequate amount of carbon to Earth, the bolide would need to have been a carbonaceous  
559 chondrite. The average concentration of total PAHs in a carbonaceous chondrite is between 15 –  
560 28  $\mu\text{g PAH / g rock}$  (48, 49). For a 5 km radius meteorite (estimates of the Chicxulub impactor  
561 are up to 6 km radius) with a PAH composition on the high end for carbonaceous chondrites (28  
562  $\mu\text{g/g}$ ), the meteorite would carry  $3.8 \times 10^{12}$  g of aromatic compounds. If the aromatics were  
563 dispersed globally and evenly in a 1 cm thick clay layer, we would expect  $2.9 \times 10^{-7}$  g aromatics  
564 / g rock, which is two orders of magnitude less than what was measured at Chicxulub and Site  
565 1262, and three orders of magnitude less than observed at Site 738. While the observed  
566 concentration of PAHs is 1-3 orders of magnitude greater than the predicted PAH concentration,  
567 this is not strong enough evidence to refute the bolide as the initial source of PAHs.

568  
569 To determine whether the excavation, and likely ignition or release to the atmosphere of  $\sim 10^{17}$  g  
570 carbon (15) would be enough to drive the observed PAH excursion, we calculated the amount of  
571 PAHs that would be released from unburned petrogenic material (directly excavated, remaining  
572 in atmosphere) and if the target rock had burned. From an oil burning experiment,  $\sim 30\%$  of the  
573 initial extractable organic matter was in the form of PAHs, and  $\sim 22\%$  of burned organic matter  
574 residue was comprised of PAHs. If we conservatively assume that 1% of the organics are in the  
575 form of oils, the direct release of target rock organics would have led to  $10^{14}$  g of aromatic  
576 material dispersed globally, or if it was burned, and 5-15% of the initial weight of organic matter  
577 remained unreacted (50),  $10^{13}$  g of organic matter would remain, and thus  $10^{12}$  g of PAHs would  
578 be globally dispersed. If this material was dispersed globally, it would lead to a global 1-cm thick  
579 boundary deposit of  $2.8 \times 10^{-7}$  g PAH /  $\text{cm}^3$  layer if all organics were combusted, which is the  
580 same order of that we observe in this study. This calculation demonstrates that the target rock is a  
581 possible source of the PAH spike, but we note that mass balance calculations are ineffective as  
582 evidence for or against carbon sources in K-Pg studies, as they incorporate assumptions on  
583 carbon concentrations, burning efficiencies, and temperature, which all affect burn product  
584 production.

585  
586 Using the assumption of  $\sim 10^{18}$  g of aboveground biomass (19, 47), this is an order of magnitude  
587 greater than the carbon hosted in the target rock (15), making the biomass combustion a  
588 sufficient driver of the PAH spike. We note that different sources of fuel, different burning  
589 parameters, and different temperatures and times of a burn will affect the generation of burn  
590 products. Because we cannot constrain the specifics of burning following the Chicxulub impact,  
591 it is not possible to predict the specific fractions of fuel that would have been converted to each  
592 burn product. Using mass balance calculations is not a viable way to rule out possible fuel  
593 sources for the carbon anomalies in K-Pg boundary layers due to the similarities in carbon  
594 reservoir size and unknowns surrounding the burning efficiencies and parameters. In addition,  
595 ruling in or out carbon sources is likely an inefficient assessment, as both biomass burning and  
596 release of carbon from the target rock occurred following the Chicxulub impact.

597

#### 598 **4. Alkylation patterns of homologous series of PAHs**

599

600 Chicxulub Site M0077 demonstrates a pyrogenic PAH pattern in all samples. PAH patterns for  
601 the homologous series of phenanthrenes (**Supplemental Figure S10**), fluorenes (**Supplemental**  
602 **Figure S11**), chrysenes (**Supplemental Figure S12**), pyrenes (**Supplemental Figure J**), and  
603 dibenzothiophenes (**Supplemental Figure K**) demonstrate petrogenic and weathered profiles, as  
604 evidenced by the convex patterns peaking at di-methylated form and the increasing concentration  
605 with increasing alkylation respectively. Fluorene and dibenzothiophene homologous series  
606 present profiles that are relatively too weathered to interpret.

607

608 Alkylated PAH Distribution Index (APDI) values presented in the main text came from pyrene,  
609 but can also be computed for other homologous series, namely chrysene and phenanthrene.  
610 Pyrene APDI values for Site M0077 are consistently negative, indicating a petrogenic source  
611 (51) (**Supplemental Figure S15**). Pyrene was selected for the main text because it was the most  
612 consistently present and had the least weathered profile across all sites. APDI from Chrysene  
613 (**Supplemental Figure S16**) also presents consistently negative values which can be linked to  
614 petrogenic sources, while APDI values from phenanthrene are more random and less reliable  
615 because it was lower in concentration and had a more weathered profile, which can overshadow  
616 source patterns (**Supplemental Figure S17**).

617

618 Kerguelen Plateau Site 738 demonstrates PAH alkylation patterns both pyrogenic and petrogenic  
619 signatures at various depths. PAH patterns for the homologous series of phenanthrenes  
620 (**Supplemental Figure S18**), fluorenes (**Supplemental Figure S19**), chrysenes (**Supplemental**  
621 **Figure S20**), pyrenes (**Supplemental Figure S21**), and dibenzothiophenes (**Supplemental**  
622 **Figure S22**) that likely are related to multiple sources of PAHs. APDI values for pyrene  
623 (**Supplemental Figure S23**), chrysene (**Supplemental Figure S24**), and phenanthrene  
624 (**Supplemental Figure S25**) demonstrate a shift towards more negative values (pyrene and  
625 chrysene) at and above the K-Pg boundary.

626

627 Walvis Ridge Site 1262 demonstrates PAH alkylation patterns which we attribute to mixed  
628 signatures due to multiple input sources. Homologous series of phenanthrenes (**Supplemental**  
629 **Figure S26**), fluorenes (**Supplemental Figure S27**), chrysenes (**Supplemental Figure S28**),  
630 pyrenes (**Supplemental Figure S29**), and dibenzothiophenes (**Supplemental Figure S30**)  
631 demonstrate mixed signatures, but more petrogenic signatures associated with the PAH spike  
632 (see main text Figure 1). APDI values for pyrene (**Supplemental Figure S31**), chrysene  
633 (**Supplemental Figure S32**), and phenanthrene (**Supplemental Figure S33**) demonstrate more  
634 petrogenic signatures (negative values) associated with the two samples within the K-Pg PAH  
635 spike, followed by a shift toward positive, pyrogenic values that may represent a background fire  
636 regime, and ultimately a shift towards more negative, petrogenic values further into the  
637 Paleogene.

638

#### 639 **5. Nonmetric Multidimensional Scaling**

640

641 Nonmetric Multidimensional Scaling (NMDS) was chosen as the ordination method due to  
642 excessive clustering (referred to as a “dust bunny effect”) present when the traditionally used

643 Principal Components Analysis (PCA) and Detrended Correspondence Analysis (DCA) were  
 644 initially tested with the dataset. NMDS works better for non-normal or non-gaussian  
 645 distributions, as it does not carry inherent assumptions of linear relationships between variables  
 646 (52). The initial dataset consisted of all PAHs excluding the naphthalene homologues,  
 647 acenaphthene, and acenaphthylene due to their low concentrations. The initial dataset consisted  
 648 of all samples from Sites M0077, 738, and 1262. Zeros were replaced by values of 0.01. PAH  
 649 integrations were replaced by fractional abundance, ( $b_{ij} = \frac{x_{ij}}{\sum_{j=1}^n x_{ij}}$ ), where, rows (i) are samples and  
 650 columns (j) are variables (PAHs), where all compounds in a sample had a value between 0 and 1,  
 651 and the sum of all PAHs in a sample was 1. The dataset contained one outlier from Site 738  
 652 (738C-20R-5 8-10 cm) that was removed.

653  
 654 Nonmetric Multidimensional Scaling (NMDS) is an indirect gradient analysis method through  
 655 which rank distances among objects is preserved, and no assumptions (i.e. no linearity,  
 656 unimodal, or gaussian relationships assumed) are made within the algorithm. Due to the lack of  
 657 assumptions, NMDS works well with data that are not normally distributed or whose scales do  
 658 not necessarily have meaning. NMDS employs an iterative algorithm to find the best rank  
 659 positions of samples based on variable attributes in a new, reduced number of dimensions in  
 660 order to make sample gradients and data structure apparent.

661  
 662 Starting with the  $n \times p$  matrix,  $\mathbf{A}$ , where  $n$  is the 41 samples and  $p$  is the 39 variables (PAHs), a  $n$   
 663  $\times n$  (41  $\times$  41) distance matrix of dissimilarities between samples is calculated using Bray-Curtis  
 664 distance measures. The Bray Curtis (Sørensen) distance measures,  $\delta_{ij}$ , where  $\delta_{ij} =$   
 665  $(\sum_{j=1}^p |a_{i,j} - a_{n,j}|) / (\sum_{j=1}^p a_{i,j} + a_{n,j})$ , where  $a_{i,j}$  represents each element ( $i$ =row,  $j$ =column).  $\Delta$   
 666 is the matrix of all distance measures ( $\delta$ ) which we aim to preserve using NMDS. Next, an initial  
 667 starting configuration is randomly assigned as the matrix  $\mathbf{X}$ , an  $n \times k$  matrix where  $k$  is the  
 668 number of dimensions included in the ordination. In this study,  $k$  values of 1 through 6 were  
 669 used, for which  $\mathbf{X}$  with the smallest  $k$  value explaining the greatest amount of structure in the  
 670 data was chosen. Each entry ( $x_{il}$ ) in  $\mathbf{X}$  was normalized so that  $x_{il} = \frac{x_{il} - \bar{x}_{il}}{\sum_{l=1}^k \sum_{i=1}^n \frac{(x_{il} - \bar{x}_{il})^2}{n \cdot k}}$ , where  $\bar{x}_{il}$  is

671 the mean value of each entity. Following the standardization of  $\mathbf{X}$ , the  $n \times n$  matrix of Euclidian  
 672 distances between samples in  $k$  space,  $\mathbf{D}$ , is calculated. Following the calculation of both  $\Delta$  and  
 673  $\mathbf{D}$ , the elements of  $\Delta$  were ranked in ascending order, after which the elements of  $\mathbf{D}$  were placed  
 674 in the same order as  $\Delta$ , after which  $\hat{\mathbf{D}}$  is calculated.  $\hat{\mathbf{D}}$  contains elements  $\hat{d}_{ij}$ , the replacement  
 675 values for  $d_{ij}$  from the  $\mathbf{D}$  matrix that improve monotonicity when  $\Delta$  ranks and  $\mathbf{D}$  ranks are plotted  
 676 against each other. Using the sum of squares of the difference between each  $d_{ij}$  and  $\hat{d}_{ij}$ , stress,  
 677  $\mathbf{S}^*$  is calculated, where  $\mathbf{S}^* = \sum_{i=1}^{n-1} \sum_{j=i+1}^n (d_{ij} - \hat{d}_{ij})^2$ . Stress was standardized using Kruskal's  
 678 stress formulation, where  $S = \mathbf{S}^* / \sum_{i=1}^{n-1} \sum_{j=i+1}^n d_{ij}^2$ , after which the square root of scaled stress,  
 679  $S$ , is taken to calculate  $S_R$ , which is analogous to the standard deviation, where  $S_R = \sqrt{S}$ . Next,  
 680 the stress was minimized by changing the configuration of sample units in  $k$  space using the  
 681 steepest-descent minimization algorithm. For each point  $i$ , the negative gradient of stress was  
 682 calculated, from which the  $k$ -length gradient vector is calculated, where  $g_{hl} =$

683  $S \sum_{i=1}^n \sum_{j=1}^n (\Delta^{hi} - \Delta^{hj}) \left[ \frac{d_{ij} - \hat{d}_{ij}}{S^*} - \frac{d_{ij}}{\sum_{i,j} d_{ij}^2} \right] \frac{(x_{il} - x_{jl})}{d_{ij}}$ , where  $i$  and  $j$  are indexes of the  $n$  points,  $l$  is

684 the index of each dimension, , where  $ghl$  indicates a shift of a third point  $h$  in the  $l$ th dimension.  $\Delta_{hi}$

685 and  $\Delta_{ij}$  are Kroekner delta values, which are always equal to 0, unless  $i=h$  or  $j=h$ , for which they  
686 are replaced by  $l$ . Next, the amount of movement is set by the step length, starting at step lengths  
687 of 0.2, and decreases as stress decreases. Finally, starting at the step where  $\mathbf{X}$  is normalized, this  
688 process was repeated 20 times (but in other circumstances may be completed once the stability  
689 criterion for stress is met). Stress values for  $k$  values of 1 through 6 were plotted against  $k$  for  
690 both Q and R mode analyses. The number of dimensions chosen for analysis was determined  
691 based on the point at which adding another dimension doesn't drastically change the stress (here,  
692 2 dimensions) (McCune & Grace, 2005). The Q mode (analysis of samples by PAH  
693 composition) NMDS ordinations were overlain with additional external variables relating to both  
694 the variables themselves (PAHs) and samples.

695  
696 Results from the Q mode NMDS (**Supplemental Figure S34**) demonstrate a separation of  
697 samples from the Chicxulub impact crater (Site M0077) from distal sites (Sites 738 and 1262)  
698 (**Supplemental Figure S35**). In the main text, we explain the separation between the three sites  
699 as a function of transport processes (main text Figure 4) due to the distribution of PAHs along  
700 NMDS1 by molecular weight and Site M0077's transport efficiency ratio values (51) and Site  
701 1262 and 738's high transport ratio values. The dominant control on the data is transport, but not  
702 timing (pre- syn- or post- boundary) (**Supplemental Figure S36**). Ring number, which is related  
703 to size and thus transport, displays a control on NMDS1 (**Supplemental Figure S37**). The  
704 number of alkylations of PAHs does not control the distribution on NMDS1, and has a minor  
705 control on NMDS2 (**Supplemental Figure S38**). Similar to other transport-related variables, the  
706 number of carbons controls the distribution on NMDS1, where the composition of PAHs at  
707 Chicxulub is more dominated by compounds with more carbons (i.e. heavier and larger  
708 molecules) than at distal sites (**Supplemental Figure S39**). The boiling point of specific  
709 molecules had a control on their distribution along NMDS1 (**Supplemental Figure S40**), which  
710 is a size and transport related parameter. NMDS1 is controlled by transport (solubility), as  
711 observed in the log  $K_{ow}$  plot (**Supplemental Figure 41**), where higher log $K_{ow}$  indicates less  
712 soluble compounds, and lower log $K_{ow}$  indicates more soluble compounds. Similar patterns are  
713 observed for volatility using log $K_{oa}$  (**Supplemental Figure S42**) and log $K_{aw}$  (**Supplemental**  
714 **Figure S43**), where more volatile PAH load positively on NMDS1 and are more associated with  
715 the composition of distal sites, whereas less volatile PAHs load negatively on NMDS1 and are  
716 associated with Chicxulub samples.

717  
718 While these size and transport related differences can also be explained by biodegradation (i.e.  
719 see the probability of linear degradation in **Supplemental Figure S44**), there is no correlation  
720 with other markers of biodegradation that would be expected in the samples. For example, if  
721 PAHs show biodegradation, biodegradation should also be witnessed in  $n$ -alkanes. One of the  
722 ways to assess  $n$ -alkane biodegradation in a sample is the isoprenoid to alkane ratios pristane /  $n$ -  
723  $C_{17}$  and phytane /  $n$ - $C_{18}$ . Linear alkanes biodegrade quicker than branched isoprenoids, meaning  
724 that isoprenoid to  $n$ -alkane ratios would be higher in more biodegraded and lower in less  
725 weathered or biodegraded samples. We observe no relationship between isoprenoid to alkane  
726 biodegradation indices and sample spread on NMDS1 (**Supplemental Figure S45**,  
727 **Supplemental Figure S46**). Thus, we conclude that transport, not biodegradation of PAHs,  
728 which both would drive size-related effects on PAH distributions, is the major control on the  
729 difference between PAH distributions at Chicxulub and distal sites.

730



## 731 6. Thermal maturity records of Sites M0077, 738, and 1262

732  
733 Hopanoid measures of thermal maturity were recorded for Sites M0077 (**Supplemental Figure**  
734 **S47**), 1262 (**Supplemental Figure S48**), and 738 (**Supplemental Figure S49**). At all sites,  
735 Moretane / Moretane + Hopane ratios were assessed for C<sub>29</sub> and C<sub>30</sub> hopanoids. Moretane /  
736 Moretane + Hopane decreases as thermal maturity proceeds, as moretane is less thermally stable  
737 than the hopane form (53–55). The C<sub>29</sub> Moretane / Moretane + Hopane value at the Chicxulub  
738 impact crater is  $0.29 \pm 0.12$ , at Site 1262 is  $0.07 \pm 0.04$ , and at Site 738 is  $0.02 \pm 0.03$ . The C<sub>30</sub>  
739 Moretane / Moretane + Hopane value at Chicxulub is  $0.31 \pm 0.13$ , at Site 1262 is  $0.06 \pm 0.04$ ,  
740 and at Site 738 is  $0.03 \pm 0.04$ . Based on Moretane / Moretane + Hopane ratios, it is evident that  
741 all sites are not past the oil window, as Moretane is still present, and the impact crater site is less  
742 thermally mature than the distal sites. Thermal maturity within the slumped interval at Chicxulub  
743 Site M0077 (2, 5) is less thermally mature than the surrounding sediments, indicating that the  
744 slumped interval may represent more modern or terrigenous input from outside of the crater.  
745 Additionally, this observation negates the hypothesis that hydrothermal fluid circulation within  
746 the crater sediments drove the observed “petrogenic” PAH signals.

747  
748 *S/R* hopanoid isomerization is also a measure of thermal maturity, where the homohopane *S* / *S* +  
749 *R* ratios increase with increasing thermal maturation, until full isomerization occurs, at which  
750 homohopane *S* / *S* + *R* values reach 0.6, which occurs at temperatures of ~ 50 °C. Even complete  
751 isomerization of the hopanoid *S* / *S* + *R* values would indicate relatively low thermal maturity  
752 (53). The C<sub>31</sub> homohopane *S* / *S* + *R* ratio at Chicxulub is  $0.48 \pm 0.07$ , at Site 1262 is  $0.55 \pm 0.03$ ,  
753 but was not calculated at Site 738 due to the low concentration of hopanoids. The C<sub>32</sub>  
754 homohopane *S* / *S* + *R* ratio at Chicxulub is  $0.70 \pm 0.14$ , at Site 1262 is  $0.55 \pm 0.09$ , but was not  
755 measured at Site 738 due to low hopanoid concentrations. At Chicxulub Site M0077, lower  
756 thermal maturity based on the C<sub>31</sub> homohopane *S* / *S* + *R* ratio is observed within the slumped  
757 unit (2, 5).

758  
759 In addition, we measured the C<sub>35</sub> homohopane index for Sites M0077 and 1262. The C<sub>35</sub>  
760 homohopane index is a thermal maturity index, but it can also be interpreted as a redox indicator  
761 (53). The C<sub>35</sub> homohopane index is determined by the sum of *S* and *R* isomers of the C<sub>35</sub>  
762 homohopane divided by all (C<sub>31-35</sub>) homohopanes. The C<sub>35</sub> homohopane index reaches values of  
763  $0.01 \pm 0.02$  at Chicxulub and  $0.05 \pm 0.04$  at Site 1262. If interpreted as a maturity marker, the  
764 C<sub>35</sub> homohopane index represents relatively low maturity at both sites. The C<sub>35</sub> homohopane  
765 index was not measured at Site 738 due to the low concentration of hopanoids.

766  
767 Additionally, the Norhopane / Norhopane + Hopane and T<sub>s</sub> / T<sub>s</sub> + T<sub>m</sub> ratios were calculated. Both  
768 ratios increase with increasing thermal maturity. The Norhopane / Norhopane + Hopane ratio  
769 reached values of  $0.78 \pm 0.19$  at Chicxulub,  $0.91 \pm 0.10$  at Site 1262, and  $0.77 \pm 0.16$  at Site 738.  
770 The T<sub>s</sub> / T<sub>s</sub> + T<sub>m</sub> ratio reached values of  $0.47 \pm 0.17$  at Chicxulub,  $0.57 \pm 0.16$  at Site 1262, and  
771  $0.79 \pm 0.22$  at Site 738. Based on all of the thermal maturity parameters, Site M0077 at the  
772 Chicxulub impact crater is less thermally mature than the distal K-Pg sites. Interestingly, lower  
773 thermal maturity according to the T<sub>s</sub> / T<sub>s</sub> + T<sub>m</sub> and Norhopane / Norhopane + Hopane indices is  
774 not observed in the slumped interval at Chicxulub. We interpret this discrepancy as the influence  
775 of environmental factors on both the T<sub>s</sub> / T<sub>s</sub> + T<sub>m</sub> and Norhopane / Norhopane + Hopane ratio,

776 including depositional environment, terrigenous influence, and redox conditions that may have  
777 overprinted or altered the otherwise thermal maturity signals.

778

779 Finally, we demonstrate low Hydrogen Index values at Site M0077 measured via Weatherford  
780 Source Rock Analyzer (**Supplemental Figure S50**). Low hydrogen index values can represent  
781 thermally mature organic matter, or coupled with high Oxygen Index values, can indicate  
782 terrigenous or inert organics. We suggest presence of low Hydrogen Indices at Site M0077  
783 suggest a thermally altered source of organics.

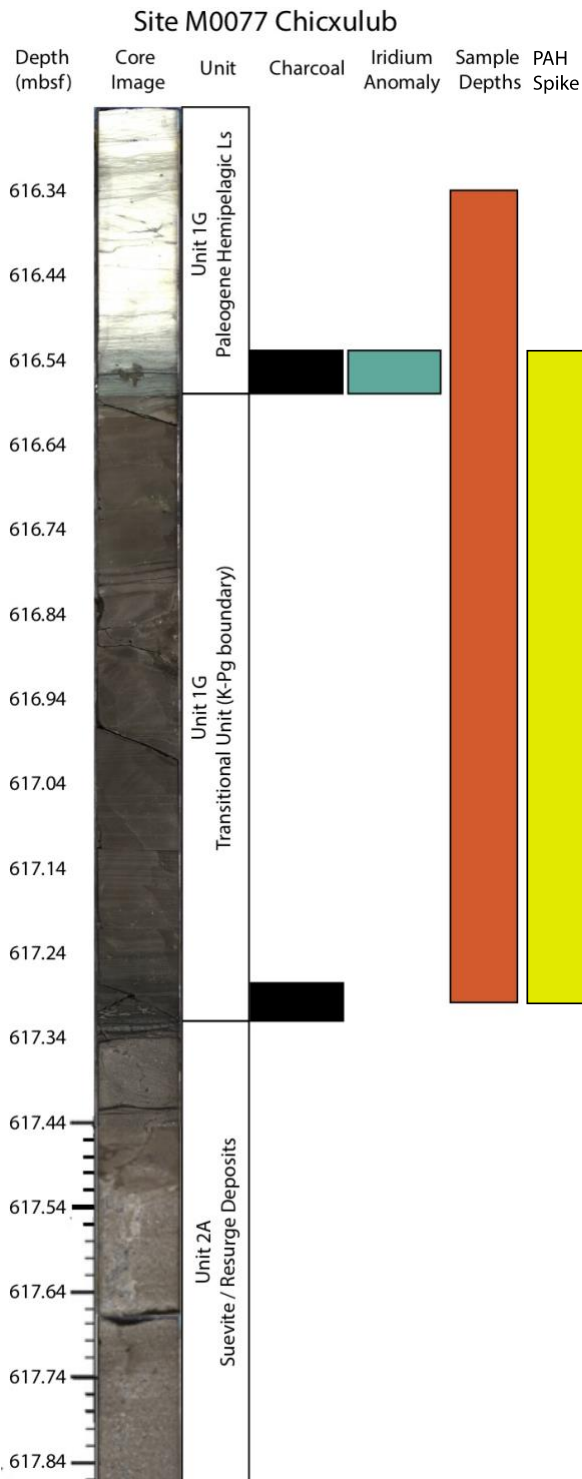

784  
 785 **Supplemental Figure S1.** Stratigraphy and samples evaluated for PAH composition at Site  
 786 M0077 (Chicxulub). The core image (Gulick *et al.*, 2019), depths, and depositional unit (Lowery  
 787 *et al.*, 2018) are displayed, demonstrating the K-Pg boundary clay. Depths with abundant  
 788 charcoal are shown in black (Gulick *et al.*, 2019), the iridium anomaly is displayed in teal,  
 789 sample depths analyzed for PAHs are displayed in orange, and the elevated PAH interval is  
 790 displayed in yellow.

## Site 738 Kerguelen Plateau

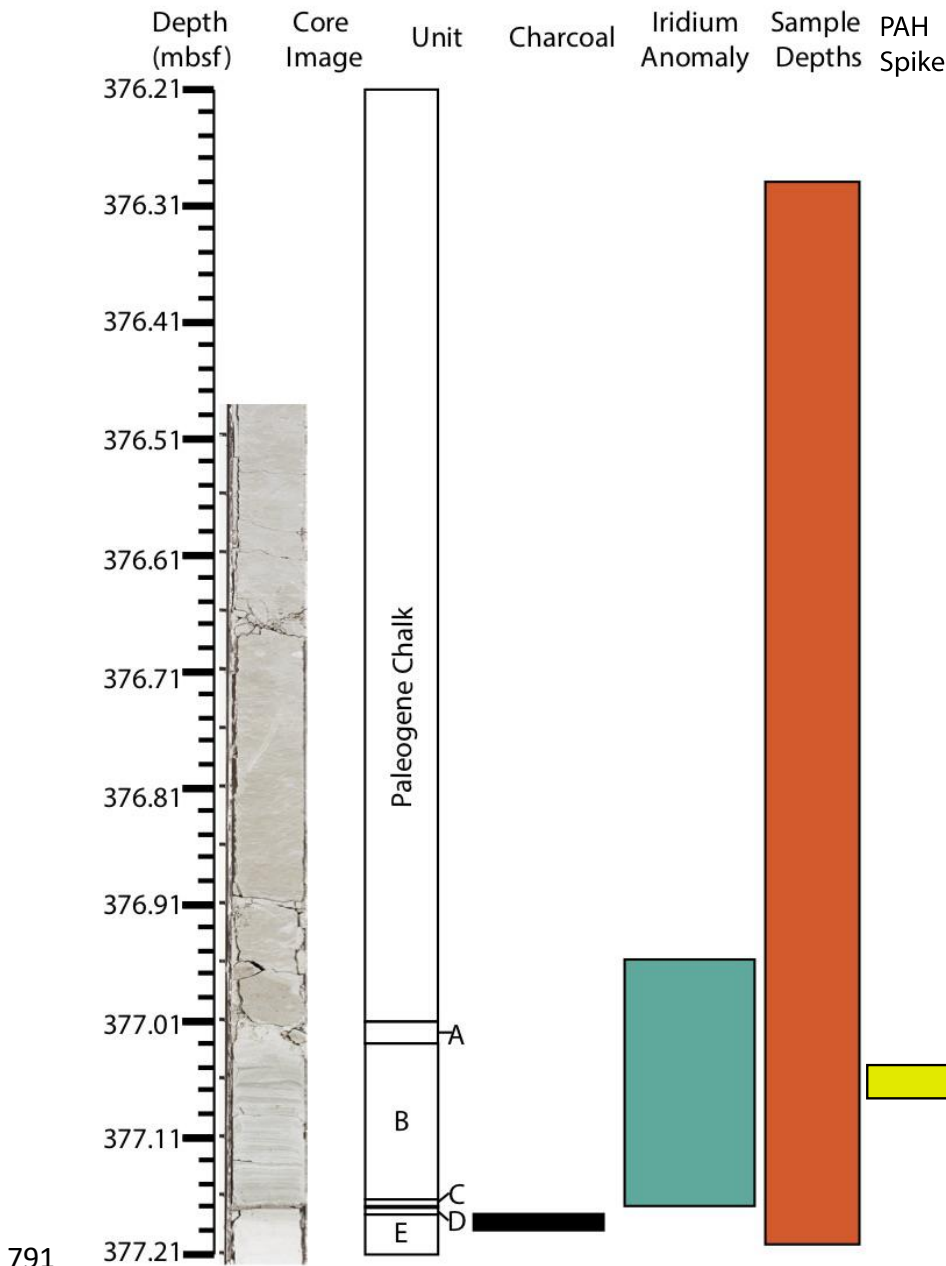

791  
792

793 **Supplemental Figure S2.** Stratigraphy and samples evaluated for PAH composition at Site 738  
 794 (Kerguelen Plateau). The core image, depths, and depositional unit (6) are displayed,  
 795 demonstrating the K-Pg boundary clay. Depths with abundant charcoal are shown in black (4),  
 796 the iridium anomaly is displayed in teal, sample depths analyzed for PAHs are displayed in  
 797 orange, and the elevated PAH interval is displayed in yellow. Units A through E represent the K-  
 798 Pg boundary unit, including the bioturbated light brown to white chalk (unit A), thesemi-  
 799 indurated, finely laminated white and green clay layers (unit B), the 3 mm thick K-Pg boundary  
 800 green clay layer (unit C), the laminated chalk (unit D), and the white, bioturbated limestone (unit  
 801 E).

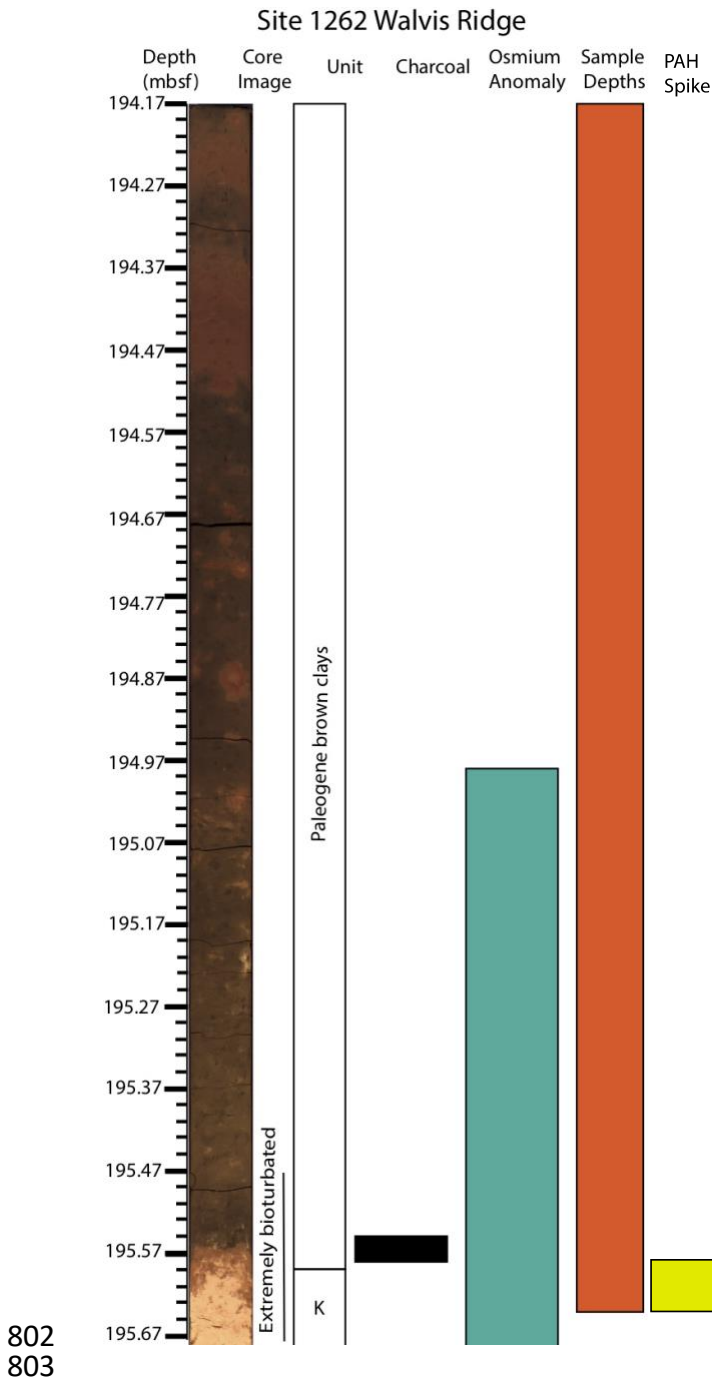

802  
803

804 **Supplemental Figure S3.** Stratigraphy and samples evaluated for PAH composition at Site 1262  
 805 (Walvis Ridge). The core depths and depositional unit (7) are displayed, demonstrating the K-Pg  
 806 boundary clay. Depths with abundant charcoal are shown in black (4), the Osmium isotope  
 807 anomaly is displayed in teal, sample depths analyzed for PAHs are displayed in orange, and the  
 808 elevated PAH interval is displayed in yellow.. The iridium anomaly has not been measured for  
 809 this site. The K-Pg boundary interval is extremely bioturbated (7) and grades from the tan – light  
 810 pink clay rich Cretaceous ooze (unit K) to the brown Paleocene clays (7). The boundary layer is  
 811 identified as 195.59 mbsf, though the true K-Pg record is smeared for ~10's of cm due to  
 812 bioturbation.

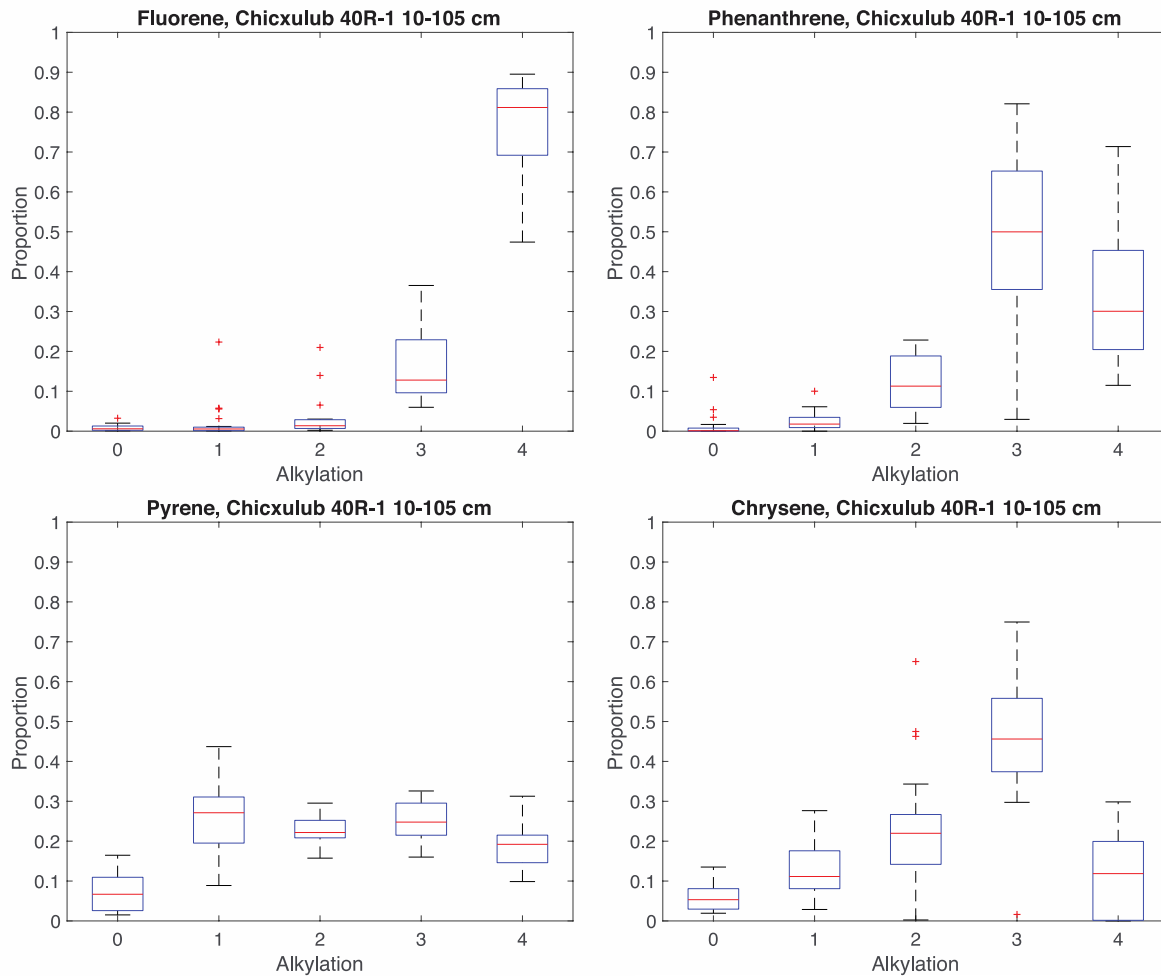

813  
814 **Supplemental Figure S4.** Alkylation patterns of homologous series of PAHs from Chicxulub  
815 Site M0077 demonstrate a propensity for more alkylated over parent forms. Box and whisker  
816 plots show the spread of data for the proportion of 0-4 alkylated PAHs relative to the sum of 0-4  
817 alkylated PAHs for each homologous series. Red lines mark the median, the blue box groups the  
818 25<sup>th</sup> and 75<sup>th</sup> percentiles, Black lines extend to the full range of the data, outliers are marked by  
819 red + symbols. Fluorene pattern is consistent with a weathering signal (56), whereas  
820 phenanthrene, pyrene, and chrysene patterns are more consistent with a petrogenic source. No  
821 PAH alkylation patterns are indicative of a strictly biomass burning source.  
822

Chicxulub Site M0077 PAH Concentrations

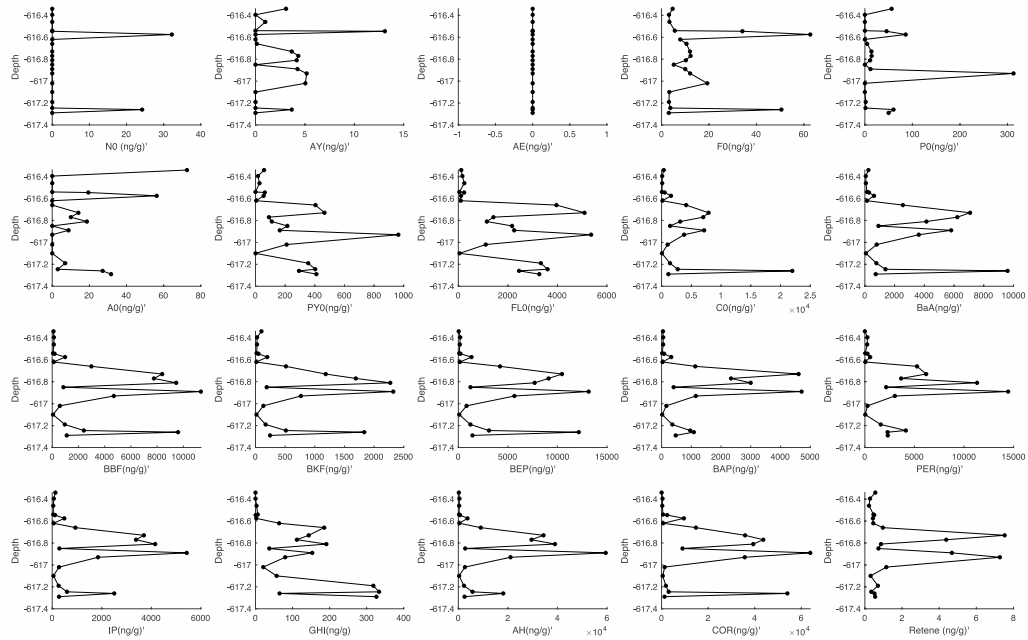

823  
 824 **Supplemental Figure S5.** Concentration of parent PAHs relative to dry rock versus depth (mbsf)  
 825 at Chicxulub. All PAH concentrations were calculated relative to a 5 point standard curve.  
 826 Curves are shown for Naphthalene (N0), Acenaphthylene (AY), Acenaphthene (AE), Fluorene  
 827 (F0), Phenanthrene (P0), Anthracene (A0), Pyrene (PY0), Fluoranthene (FL0), Chrysene (C0),  
 828 Benz[a]anthracene (BaA), Benzo[b]fluoranthene (BBF), Benzo[k]fluoranthene (BKF),  
 829 Benzo[e]pyrene (BEP), Benzo[a]pyrene (BAP), Perylene (PER), Indeno[1,2,3-cd]pyrene (IP),  
 830 Benzo[ghi]perylene (GHI), Dibenz[ah]anthracene (AH), Coronene (COR), and Retene (RET).  
 831 PAH concentrations relative to rock are highest within the boundary layer (below 616.58 mbsf)  
 832 and concentrations of larger PAHs are typically greater than smaller PAHs.  
 833

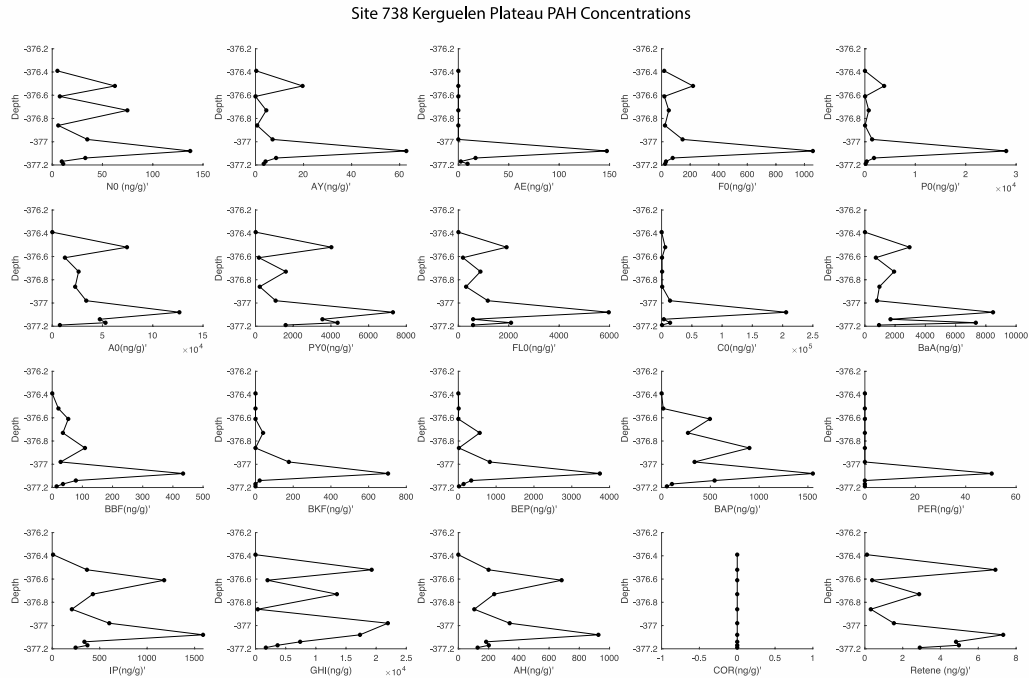

834  
 835 **Supplemental Figure S6.** Concentration of parent PAHs relative to dry rock versus depth (mbsf)  
 836 at Kerguelen Plateau Site 738. All PAH concentrations were calculated relative to a 5 point  
 837 standard curve. Curves are shown for Naphthalene (N0), Acenaphthylene (AY), Acenaphthene  
 838 (AE), Fluorene (F0), Phenanthrene (P0), Anthracene (A0), Pyrene (PY0), Fluoranthene (FL0),  
 839 Chrysene (C0), Benz[a]anthracene (BaA), Benzo[b]fluoranthene (BBF), Benzo[k]fluoranthene  
 840 (BKF), Benzo[e]pyrene (BEP), Benzo[a]pyrene (BAP), Perylene (PER), Indeno[1,2,3-cd]pyrene  
 841 (IP), Benzo[ghi]perylene (GHI), Dibenz[ah]anthracene (AH), Coronene (COR), and Retene  
 842 (RET). PAH concentrations for most species are highest at 377.08 mbsf, within the K-Pg impact-  
 843 related deposit.  
 844



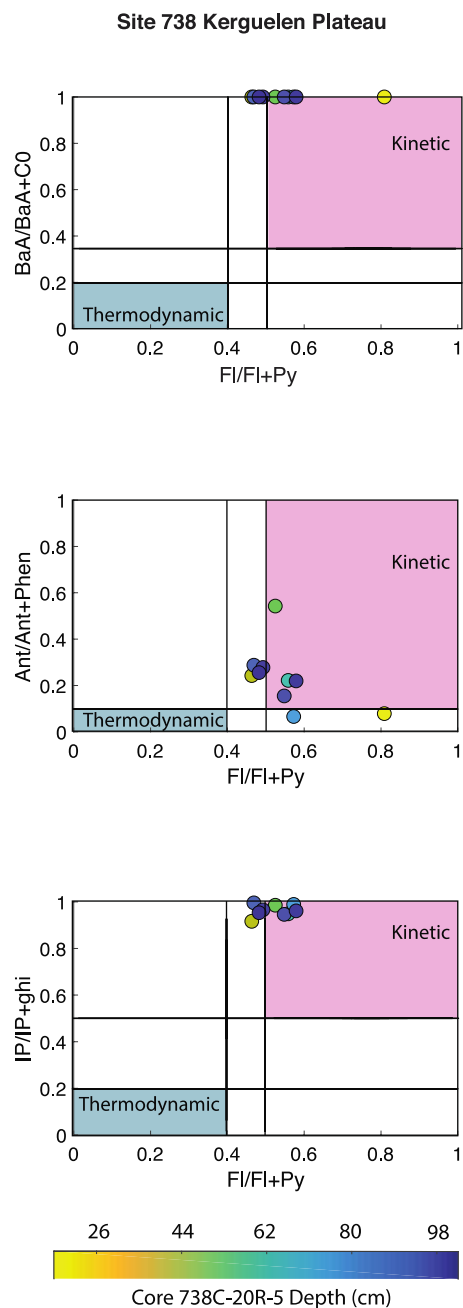

845  
 846 **Supplemental Figure S7.** PAH ratios at Site 738 are dominated by kinetic isomers. Three  
 847 kinetic / (kinetic + thermodynamic) isomer ratio biplots with kinetic-source and thermodynamic  
 848 source cutoffs indicated by solid black lines. Pink quadrants represent kinetically favored PAH  
 849 ratios, blue quadrants represent thermodynamically favored PAH ratios, and white space  
 850 indicates mixed kinetic and thermodynamic sources. Samples from Site 738 are colored by depth  
 851 in Core 738C-20R-5. Observational cutoff values from Rocha & Palma (2019): FI/FI+Py:  
 852 thermodynamic < 0.4, kinetic > 0.5; BaA/BaA+C0: thermodynamic < 0.2, kinetic > 0.35;  
 853 Ant/Ant+Phen: thermodynamic < 0.1, kinetic > 0.1; IP/IP+ghi: thermodynamic < 0.2, kinetic >  
 854 0.5. PAH abbreviations: FI: Fluoranthene, Py : Pyrene; BaA: Benz[a]anthrance; C0 : Chrysene;  
 855 Ant: Anthracene; Phen: Phenanthrene; IP: Indeno[1,2,3-c,d]pyrene; ghi: Benzo[ghi]perylene  
 856 (56). Plot modified from Rocha & Palma, 2019.

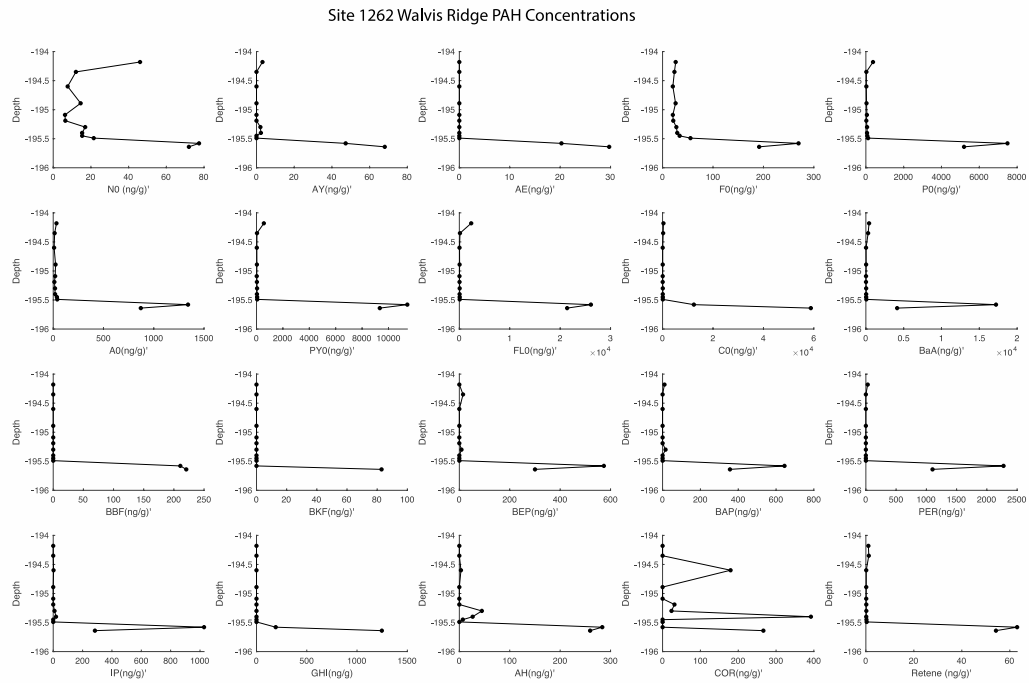

858  
 859 **Supplemental Figure S8.** Concentration of parent PAHs relative to dry rock versus depth (mbsf)  
 860 at Walvis Ridge Site 1262. All PAH concentrations were calculated relative to a 5 point standard  
 861 curve. Curves are shown for Naphthalene (N0), Acenaphthylene (AY), Acenaphthene (AE),  
 862 Fluorene (F0), Phenanthrene (P0), Anthracene (A0), Pyrene (PY0), Fluoranthene (FL0),  
 863 Chrysene (C0), Benz[a]anthracene (BaA), Benzo[b]fluoranthene (BBF), Benzo[k]fluoranthene  
 864 (BKF), Benzo[e]pyrene (BEP), Benzo[a]pyrene (BAP), Perylene (PER), Indeno[1,2,3-cd]pyrene  
 865 (IP), Benzo[ghi]perylene (GHI), Dibenz[ah]anthracene (AH), Coronene (COR), and Retene  
 866 (RET). PAH concentrations are highest between 195.58 – 195.64 mbsf, within the K-Pg impact-  
 867 related deposit.  
 868

Site 1262 Walvis Ridge

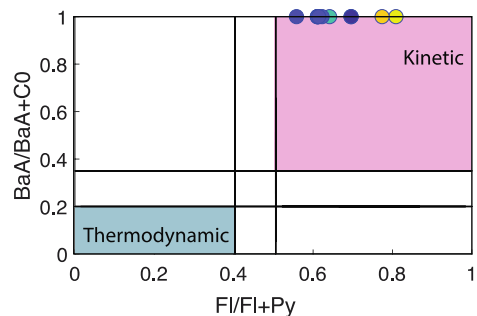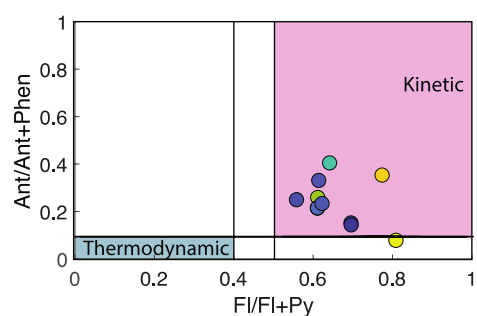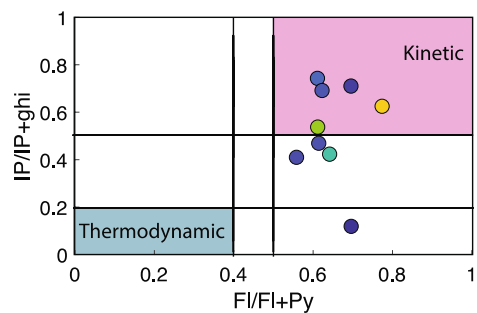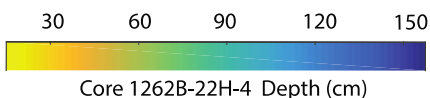

869  
 870 **Supplemental Figure S9.** PAH ratios at Site 1262 are dominated by kinetic isomers. Three  
 871 kinetic / (kinetic + thermodynamic) isomer ratio biplots with kinetic-source and thermodynamic  
 872 source cutoffs indicated by solid black lines. Pink quadrants represent kinetically favored PAH  
 873 ratios, blue quadrants represent thermodynamically favored PAH ratios, and white space  
 874 indicates mixed kinetic and thermodynamic sources. Samples from Site 1262 are colored by  
 875 depth in Core 1262B-22H-5. Observational cutoff values from Rocha & Palma (2019): FI/FI+Py:  
 876 thermodynamic < 0.4, kinetic > 0.5; BaA/BaA+C0: thermodynamic < 0.2, kinetic > 0.35;  
 877 Ant/Ant+Phen: thermodynamic < 0.1, kinetic > 0.1; IP/IP+ghi: thermodynamic < 0.2, kinetic >  
 878 0.5. PAH abbreviations: FI: Fluoranthene, Py : Pyrene; BaA: Benz[a]anthrance; C0 : Chrysene;  
 879 Ant: Anthracene; Phen: Phenanthrene; IP: Indeno[1,2,3-c,d]pyrene; ghi: Benzo[ghi]perylene  
 880 (56). Plot modified from Rocha & Palma, 2019.

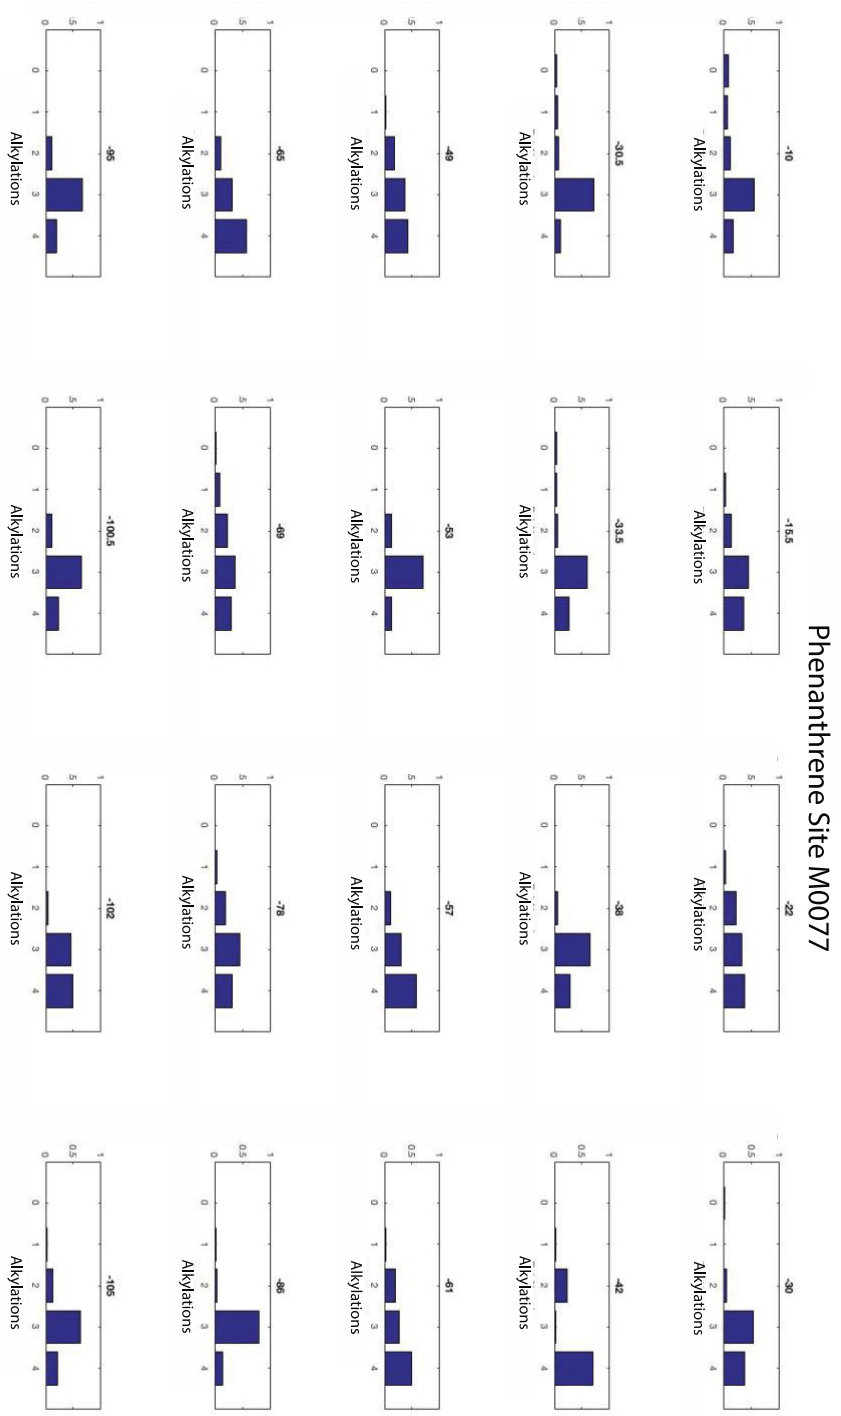

881  
882  
883  
884  
885  
886  
887  
888

**Supplemental Figure S10.** Relative abundances of alkylated phenanthrenes from Site M0077 within the Chicxulub impact crater demonstrate a heightened abundance of alkylated phenanthrenes relative to the non-alkylated parent form. Most profiles are consistent with a petrogenic or weathered source. Numbers on the x-axis represent the number of methylations, and the y-axis is the relative abundance of each compound relative to the sum of 0-4 alkylated isomers. Numbers at the top of each plot represent the depth in Section 0077-40R-1.

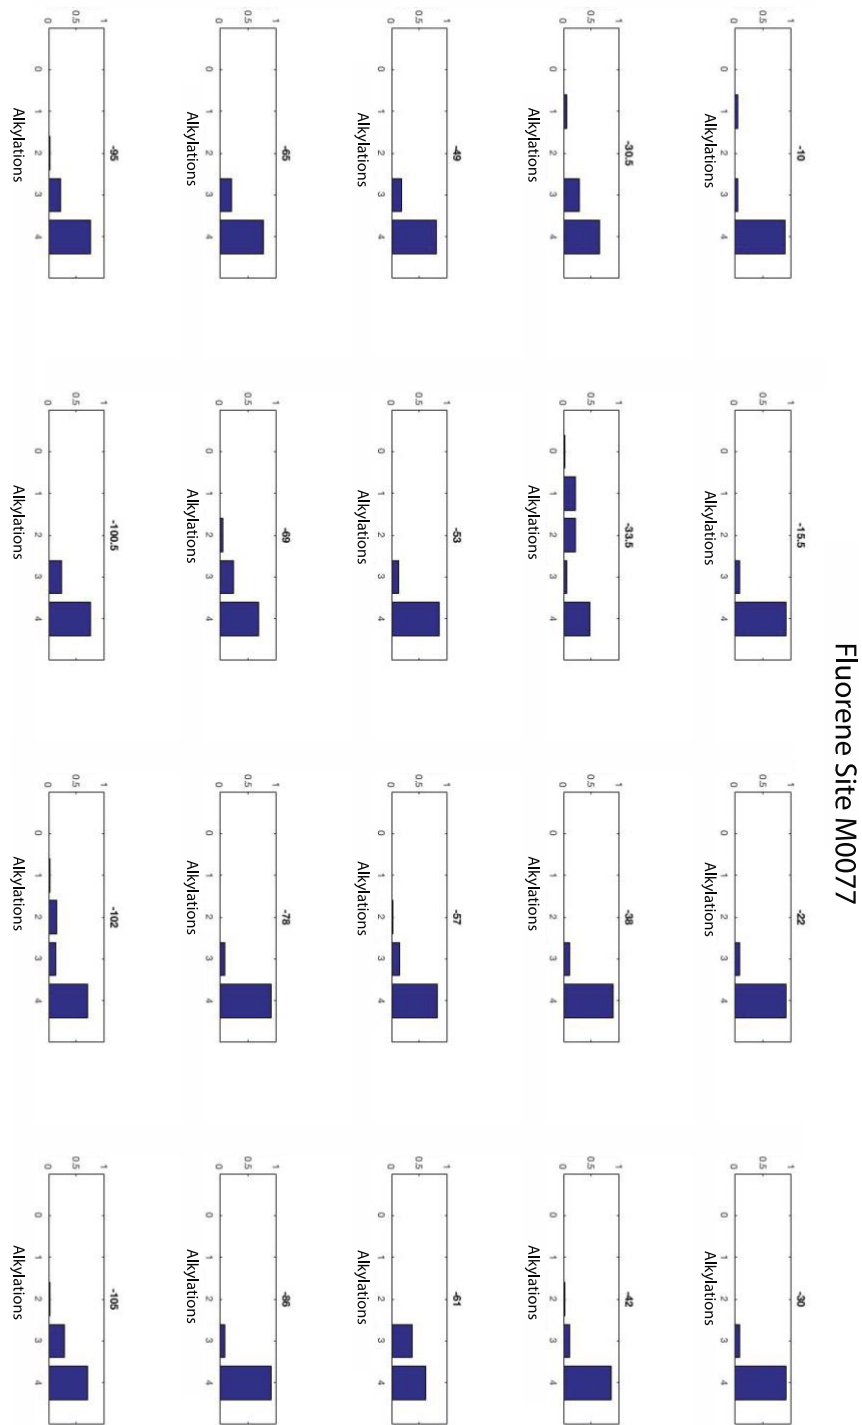

889  
 890 **Supplemental Figure S11.** Relative abundances of alkylated fluorenes from Site M0077 within  
 891 the Chicxulub impact crater demonstrate a heightened abundance of alkylated fluorenes relative  
 892 to the non-alkylated parent form. All profiles are consistent with a weathered source. Numbers  
 893 on the x-axis represent the number of methylations, and the y-axis is the relative abundance of  
 894 each compound relative to the sum of 0-4 alkylated isomers. Numbers at the top of each plot  
 895 represent the depth in Section 0077-40R-1.

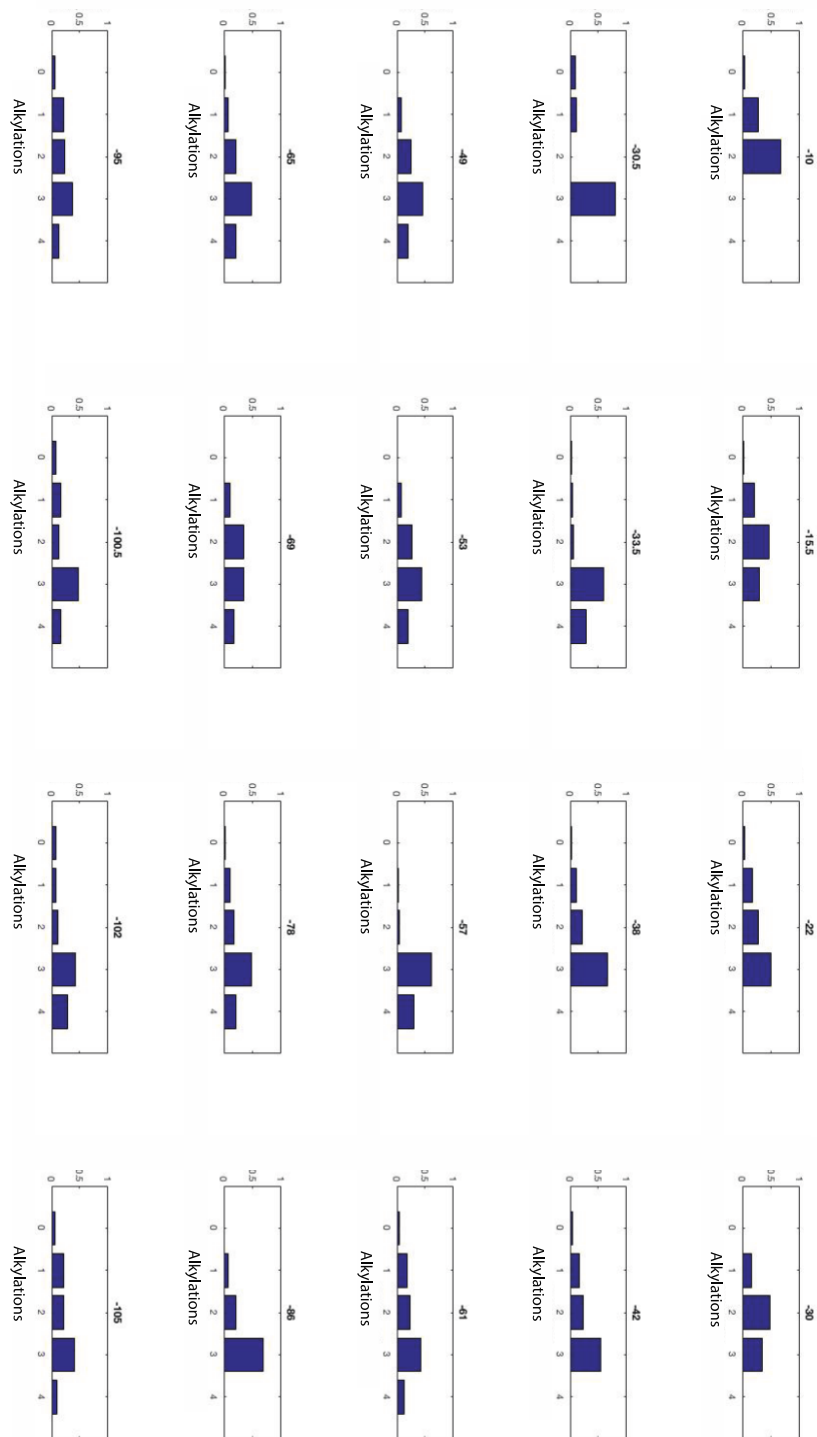

Chrysene Site M0077

896  
 897 **Supplemental Figure S12.** Relative abundances of alkylated chrysenes from Site M0077 within  
 898 the Chicxulub impact crater demonstrate a heightened abundance of alkylated chrysenes relative  
 899 to the non-alkylated parent form. Most profiles are consistent with a petrogenic source. Numbers  
 900 on the x-axis represent the number of methylations, and the y-axis is the relative abundance of  
 901 each compound relative to the sum of 0-4 alkylated isomers. Numbers at the top of each plot  
 902 represent the depth in Section 0077-40R-1.

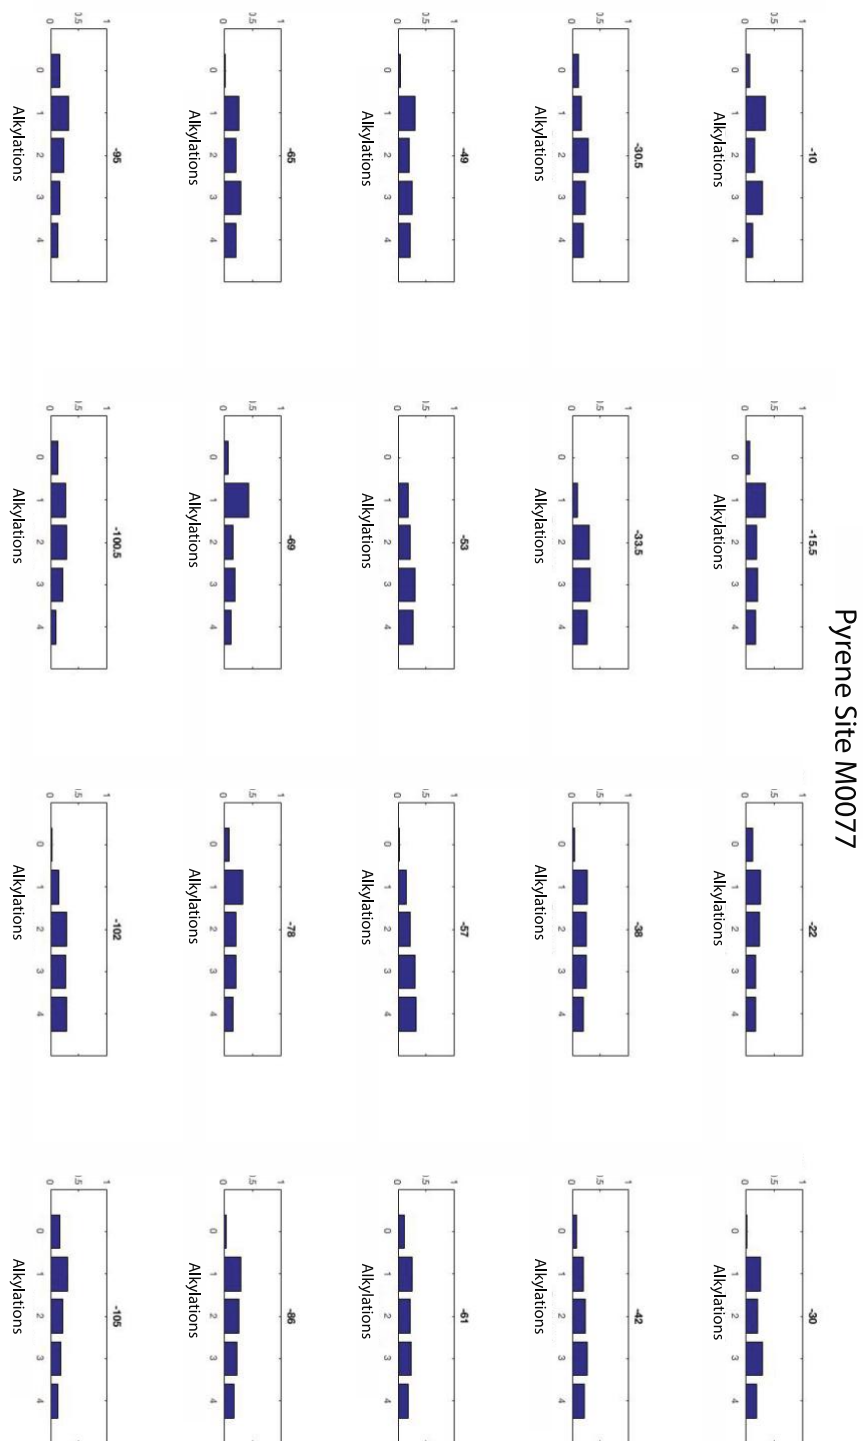

903  
 904 **Supplemental Figure S13.** Relative abundances of alkylated pyrenes from Site M0077 within  
 905 the Chicxulub impact crater demonstrate a heightened abundance of alkylated pyrenes relative to  
 906 the non-alkylated parent form. Most signatures are consistent with a petrogenic, and likely  
 907 weathered, source. Numbers on the x-axis represent the number of methylations, and the y-axis  
 908 is the relative abundance of each compound relative to the sum of 0-4 alkylated isomers.  
 909 Numbers at the top of each plot represent the depth in Section 0077-40R-1.

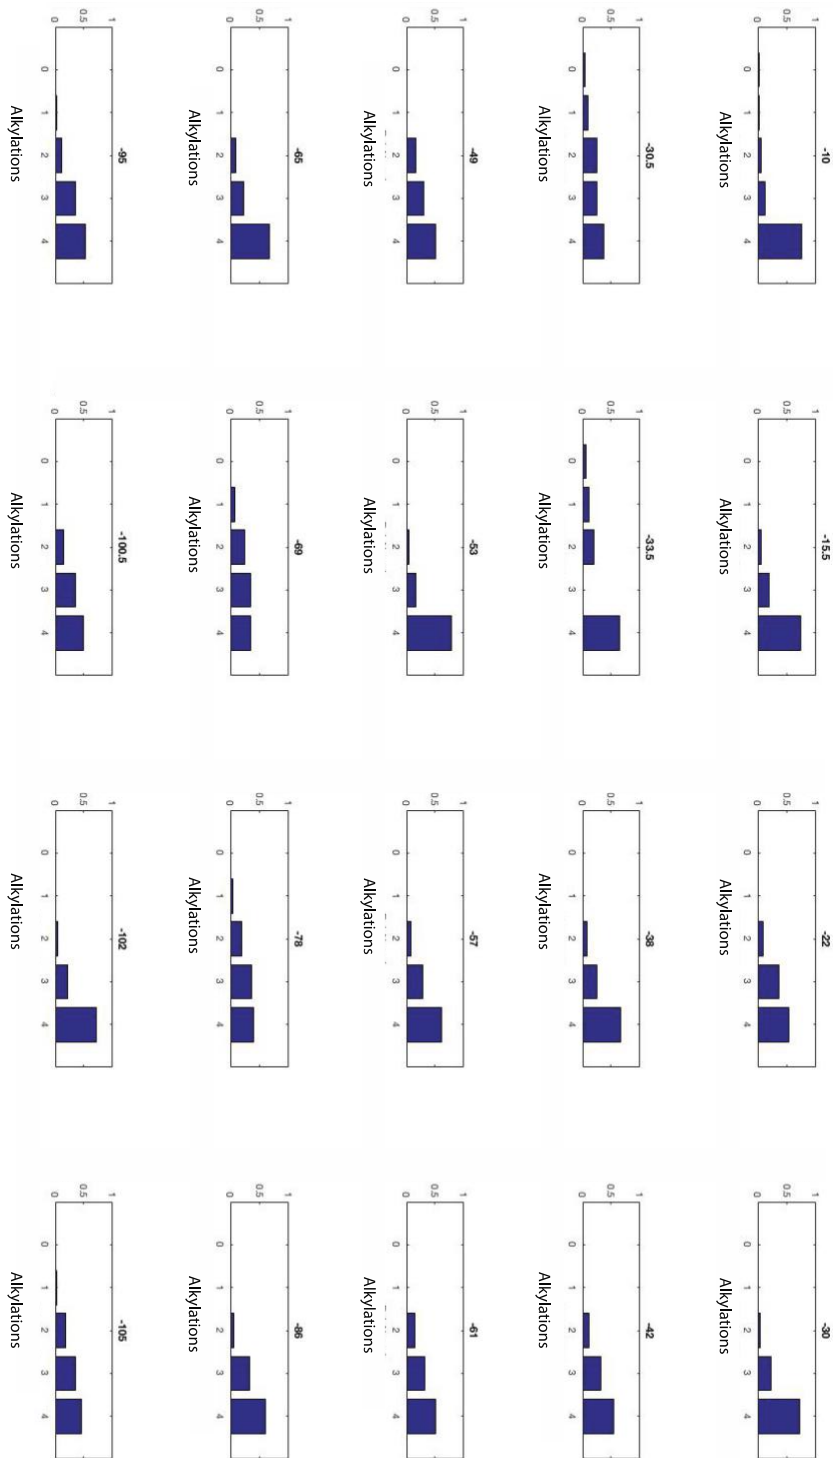

Dibenzothiophene Site M0077

910  
 911 **Supplemental Figure S14.** Relative abundances of alkylated dibenzothiophenes from Site  
 912 M0077 within the Chicxulub impact crater demonstrate a heightened abundance of alkylated  
 913 dibenzothiophenes relative to the non-alkylated parent form. Profiles represent a weathered  
 914 signature. Numbers on the x-axis represent the number of methylations, and the y-axis is the  
 915 relative abundance of each compound relative to the sum of 0-4 alkylated isomers. Numbers at  
 916 the top of each plot represent the depth in Section 0077-40R-1.



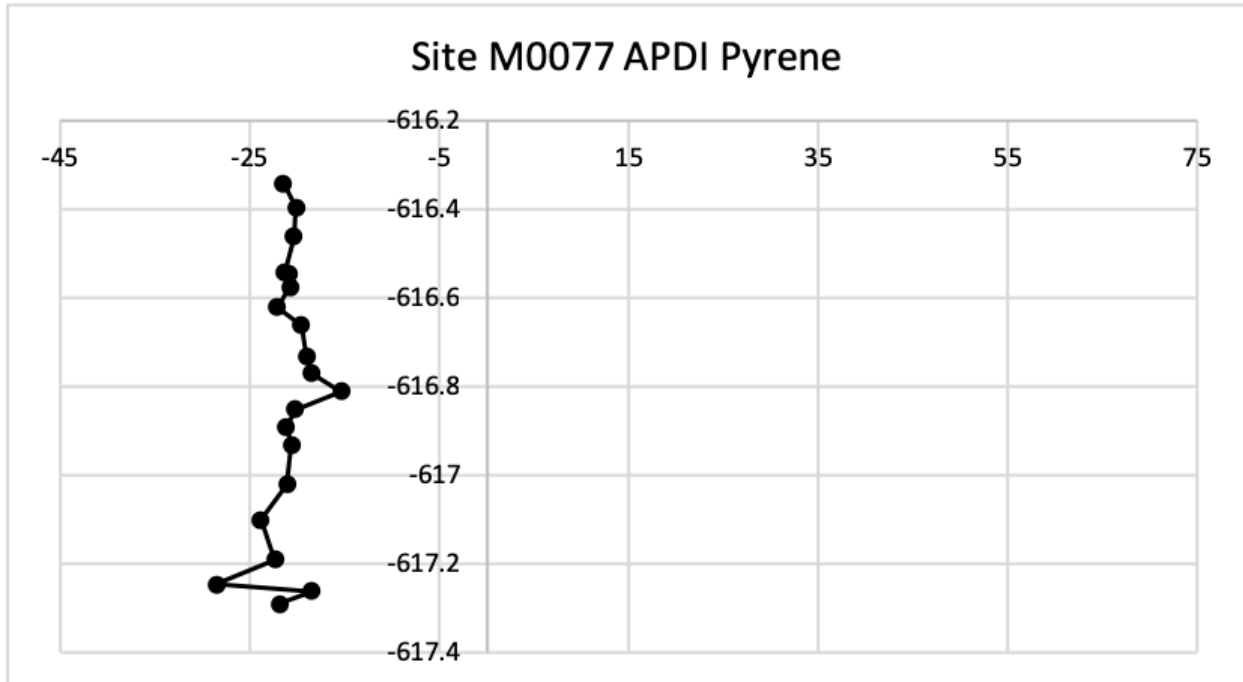

917  
 918  
 919  
 920  
 921  
 922  
 923  
 924  
 925  
 926  
 927

**Supplemental Figure S15.** The Alkylated PAH Distribution Index (51) based on the homologous series of pyrenes presents negative, “petrogenic” source values at Chicxulub. The y-axis represents depth (mbsf) at Site M0077, and the y-axis is the Pyrene APDI. Negative values indicate a petrogenic source, positive values indicate a pyrogenic source, and values near 0 represent mixed or undiscernible sources.

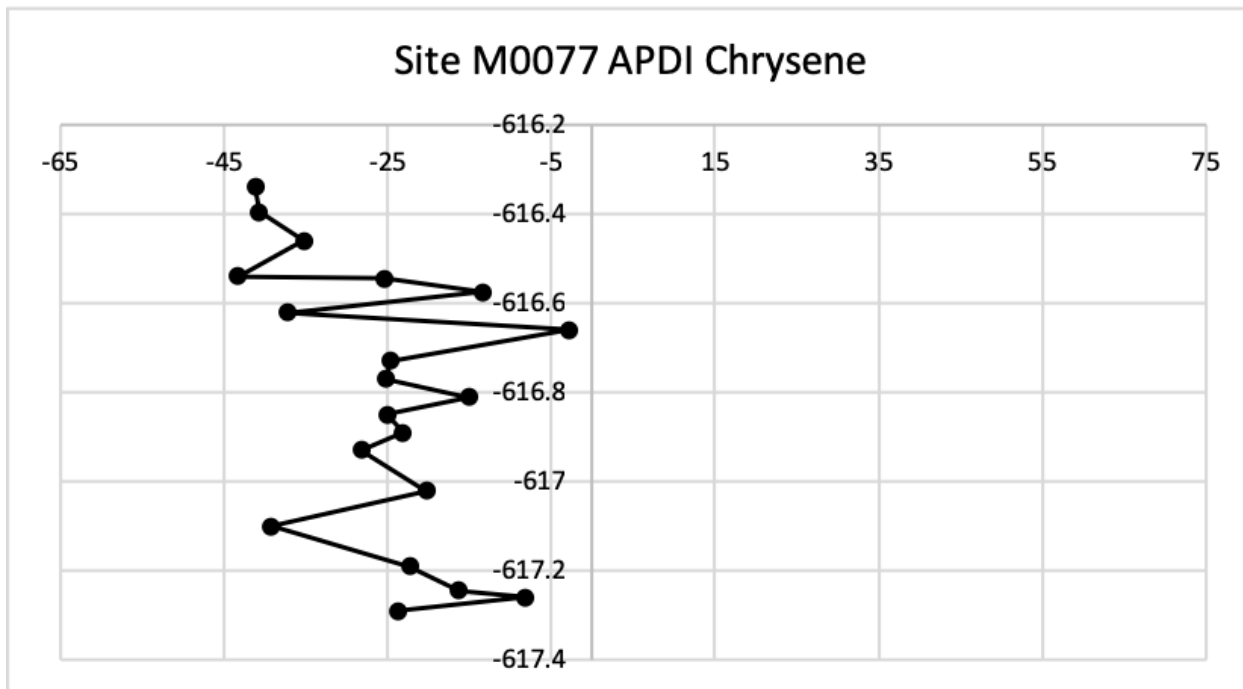

928  
 929  
 930  
 931  
 932  
 933  
 934  
 935  
 936  
 937  
 938  
 939

**Supplemental Figure S16.** The Alkylated PAH Distribution Index (51) based on the homologous series of chrysenes presents negative, “petrogenic” source values at Chicxulub. The y-axis represents depth (mbsf) at Site M0077, and the y-axis is the Chrysene APDI. Negative values indicate a petrogenic source, positive values indicate a pyrogenic source, and values near 0 represent mixed or indiscernible sources.

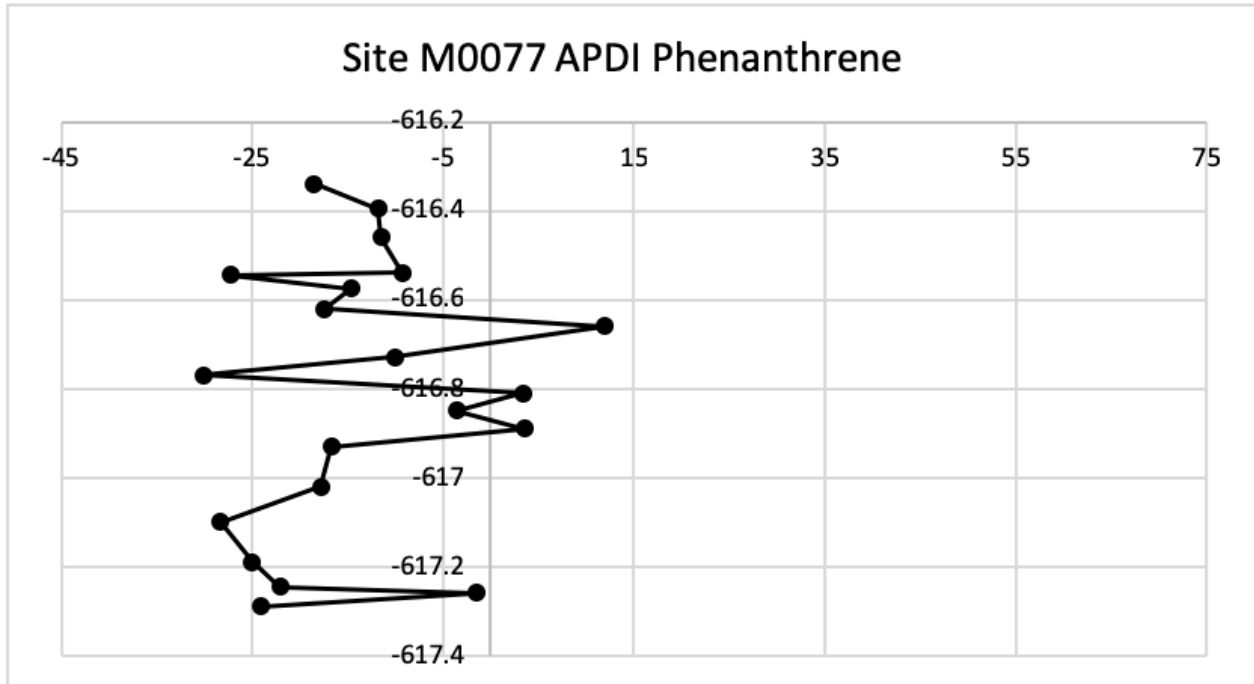

940  
 941  
 942  
 943  
 944  
 945  
 946  
 947  
 948  
 949

**Supplemental Figure S17.** The Alkylated PAH Distribution Index (51) based on the homologous series of phenanthrenes presents negative, “petrogenic” source values to near-zero, mixed source values at Chicxulub. The y-axis represents depth (mbsf) at Site M0077, and the y-axis is the Phenanthrene APDI. Negative values indicate a petrogenic source, positive values indicate a pyrogenic source, and values near 0 represent mixed or undiscernible sources. We suggest the highly variable data is a result of the low concentration of phenanthrenes at Site M0077.

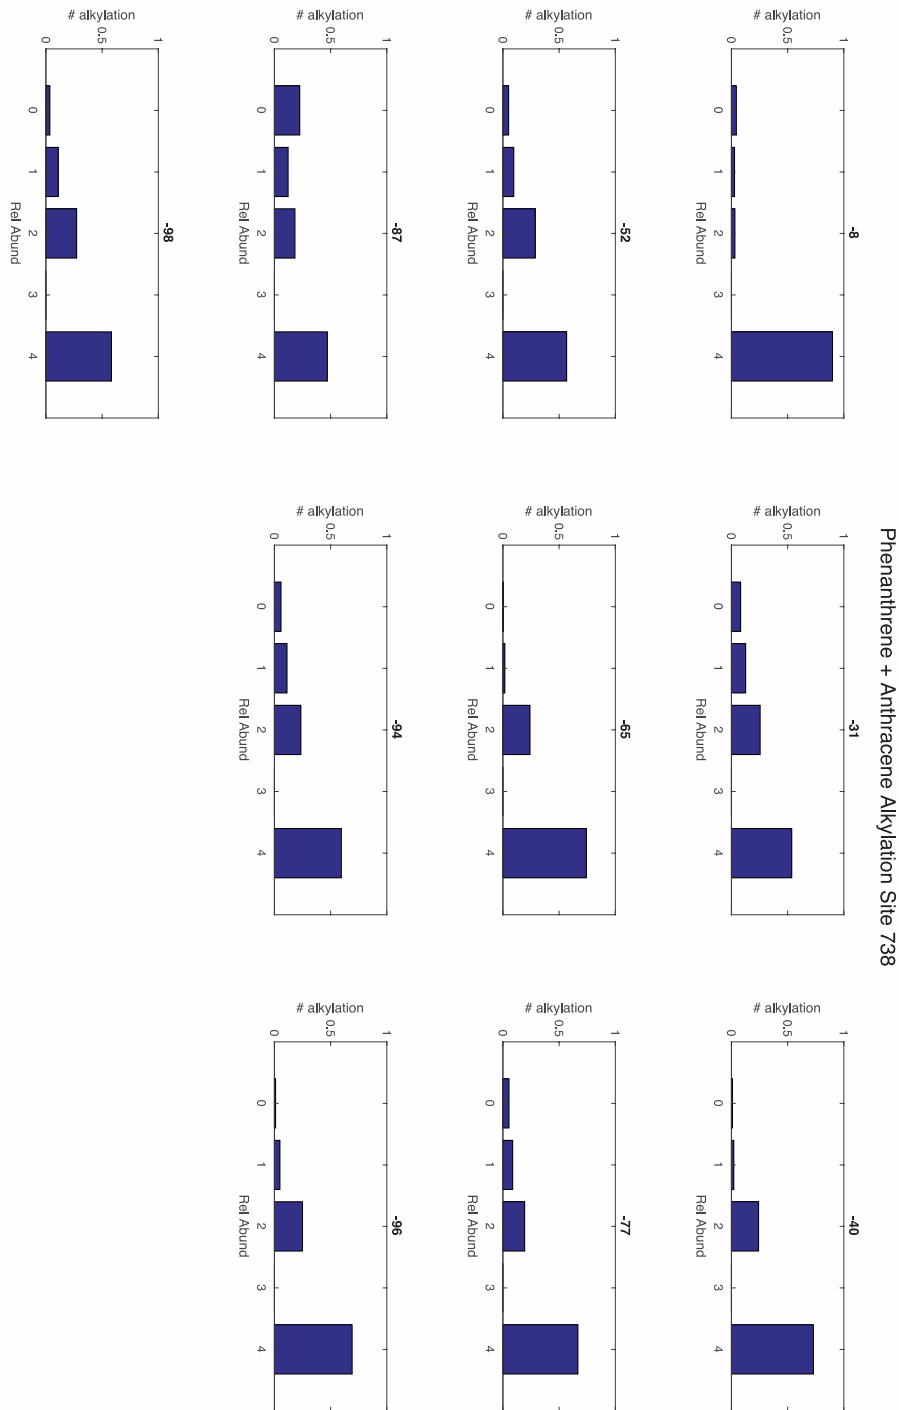

950  
 951 **Supplemental Figure S18.** Relative abundances of alkylated phenanthrenes from Site 738 at  
 952 Kerguelen Plateau demonstrate a heightened abundance of alkylated phenanthrenes relative to  
 953 the non-alkylated parent form. Most signatures are consistent with a weathered, source. Numbers  
 954 on the x-axis represent the number of methylations, and the y-axis is the relative abundance of  
 955 each compound relative to the sum of 0-4 alkylated isomers. Numbers at the top of each plot  
 956 represent the depth in Section 738C-20R-5.

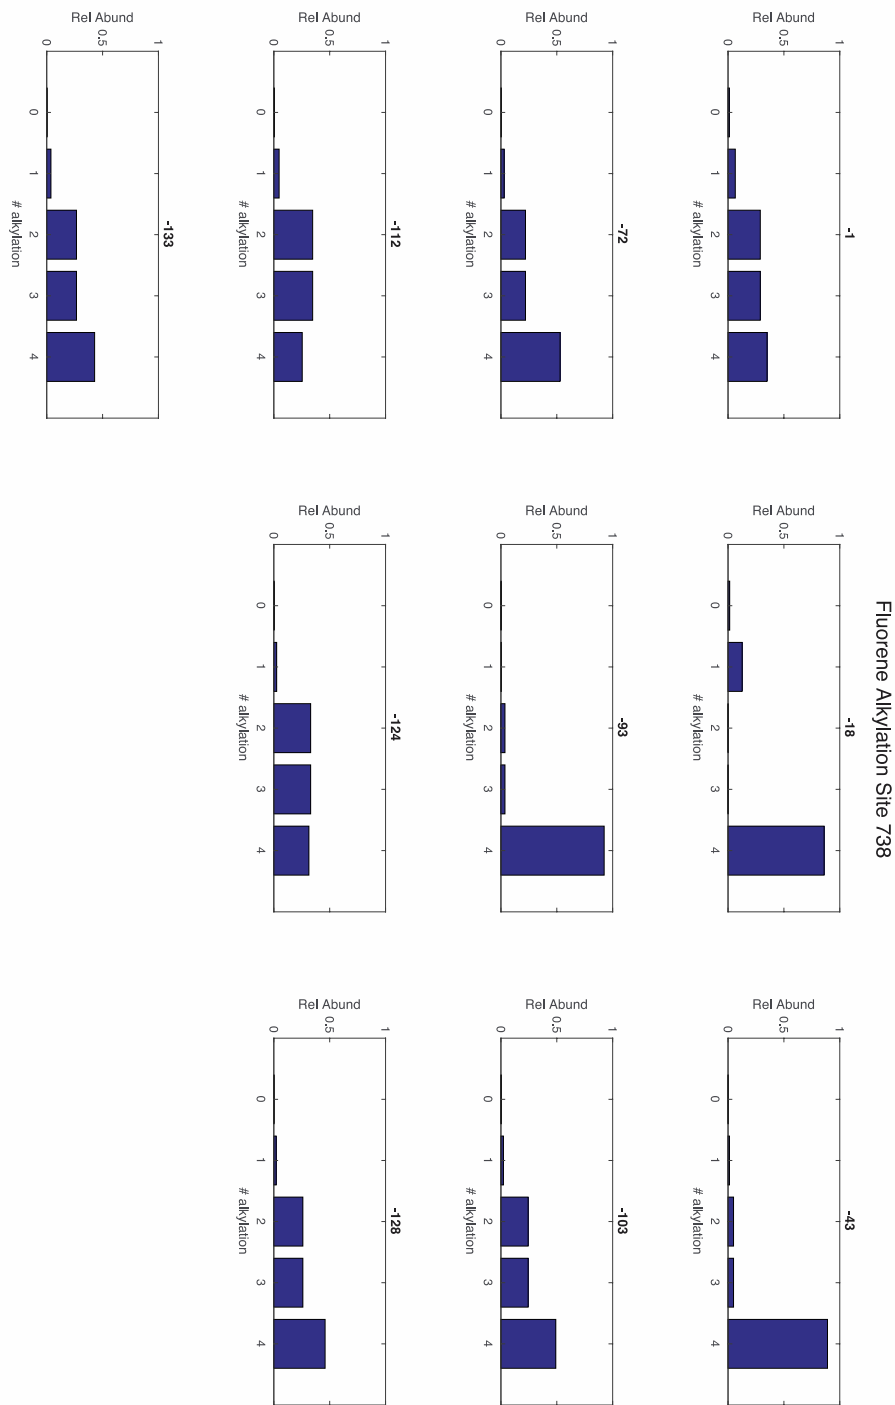

957  
 958 **Supplemental Figure S19.** Relative abundances of alkylated fluorenes from Site 738 at  
 959 Kerguelen Plateau demonstrate a heightened abundance of alkylated fluorenes relative to the  
 960 non-alkylated parent form. Most signatures are consistent with a weathered petrogenic, source.  
 961 Numbers on the x-axis represent the number of methylations, and the y-axis is the relative  
 962 abundance of each compound relative to the sum of 0-4 alkylated isomers. Numbers at the top of  
 963 each plot represent the depth in Section 738C-20R-5.

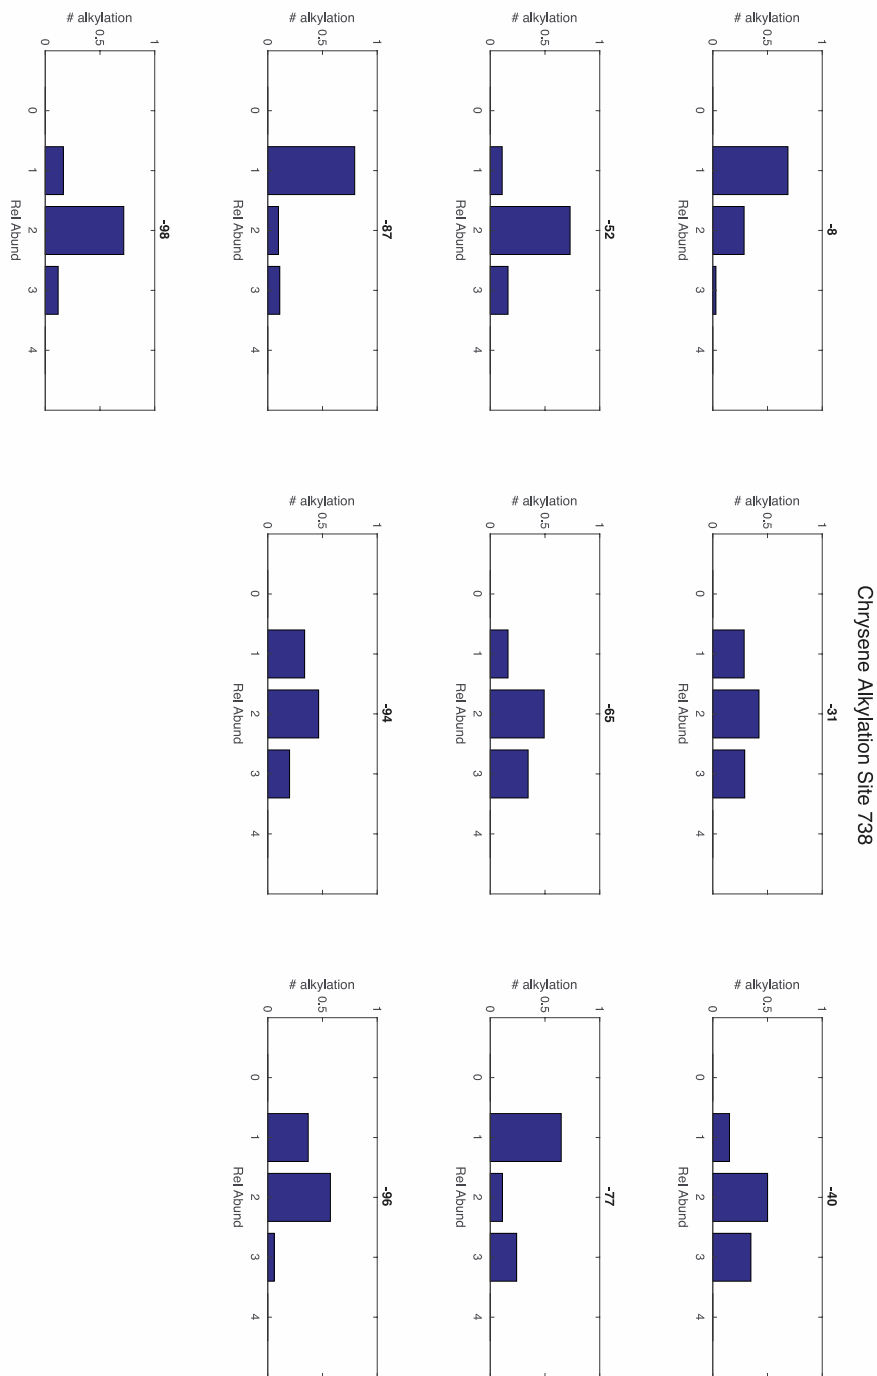

964  
 965 **Supplemental Figure S20.** Relative abundances of alkylated chrysenes from Site 738 at  
 966 Kerguelen Plateau demonstrate a heightened abundance of alkylated chrysenes relative to the  
 967 non-alkylated parent form. Signatures present various sources (weathered, mixed, pyrogenic, and  
 968 petrogenic). Numbers on the x-axis represent the number of methylations, and the y-axis is the  
 969 relative abundance of each compound relative to the sum of 0-4 alkylated isomers. Numbers at  
 970 the top of each plot represent the depth in Section 738C-20R-5. Numbers at the top of each plot  
 971 represent the depth in Section 738C-20R-5.

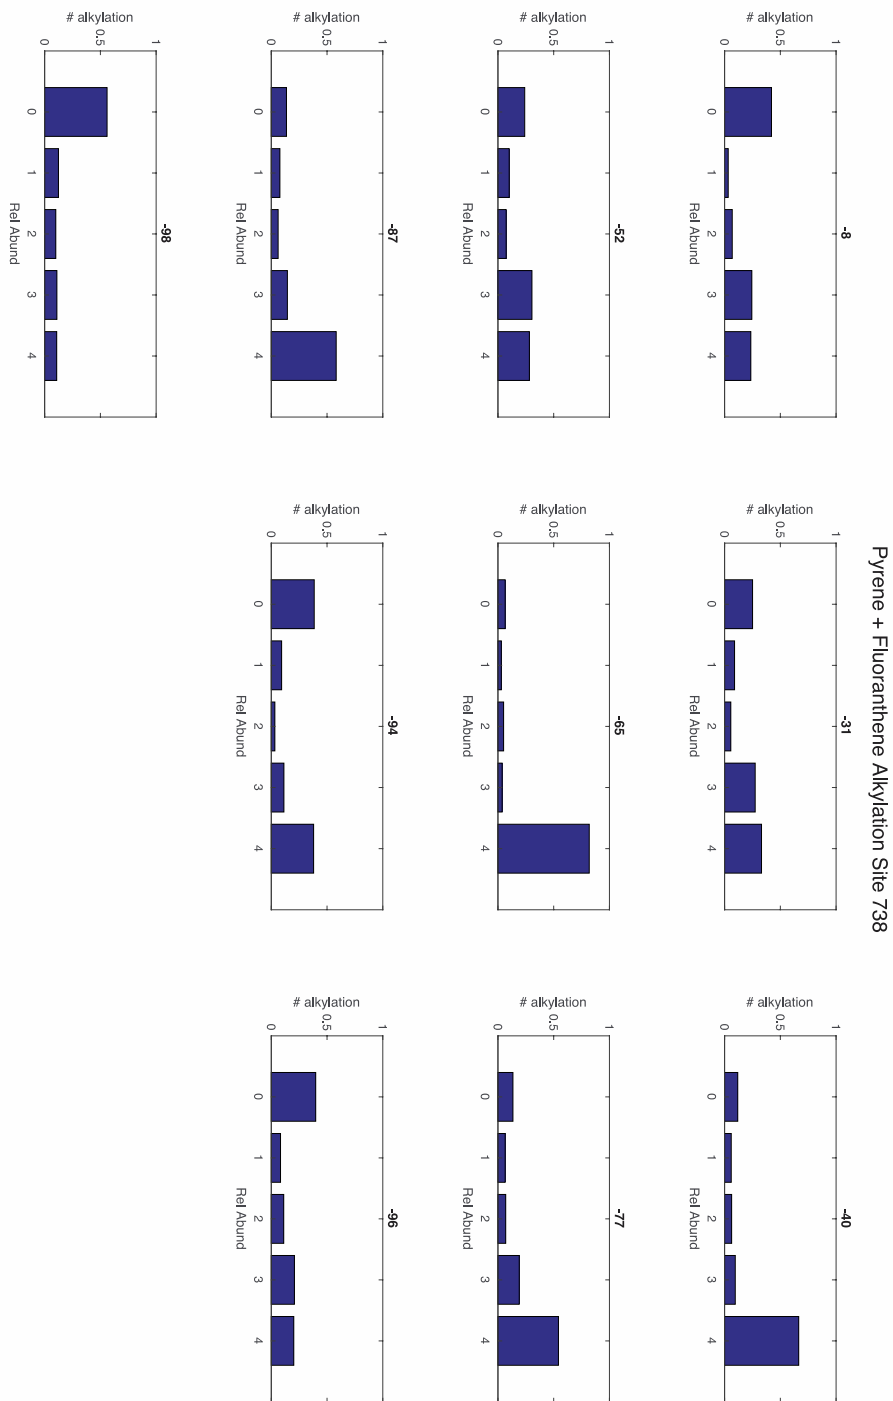

972  
 973 **Supplemental Figure S21.** Relative abundances of alkylated pyrenes from Site 738 at  
 974 Kerguelen Plateau demonstrate a heightened abundance of alkylated pyrenes relative to the non-  
 975 alkylated parent form in samples at 87 cm and above. Most signatures are consistent with a  
 976 weathered, source. Numbers on the x-axis represent the number of methylations, and the y-axis  
 977 is the relative abundance of each compound relative to the sum of 0-4 alkylated isomers.  
 978 Numbers at the top of each plot represent the depth in Section 738C-20R-5.

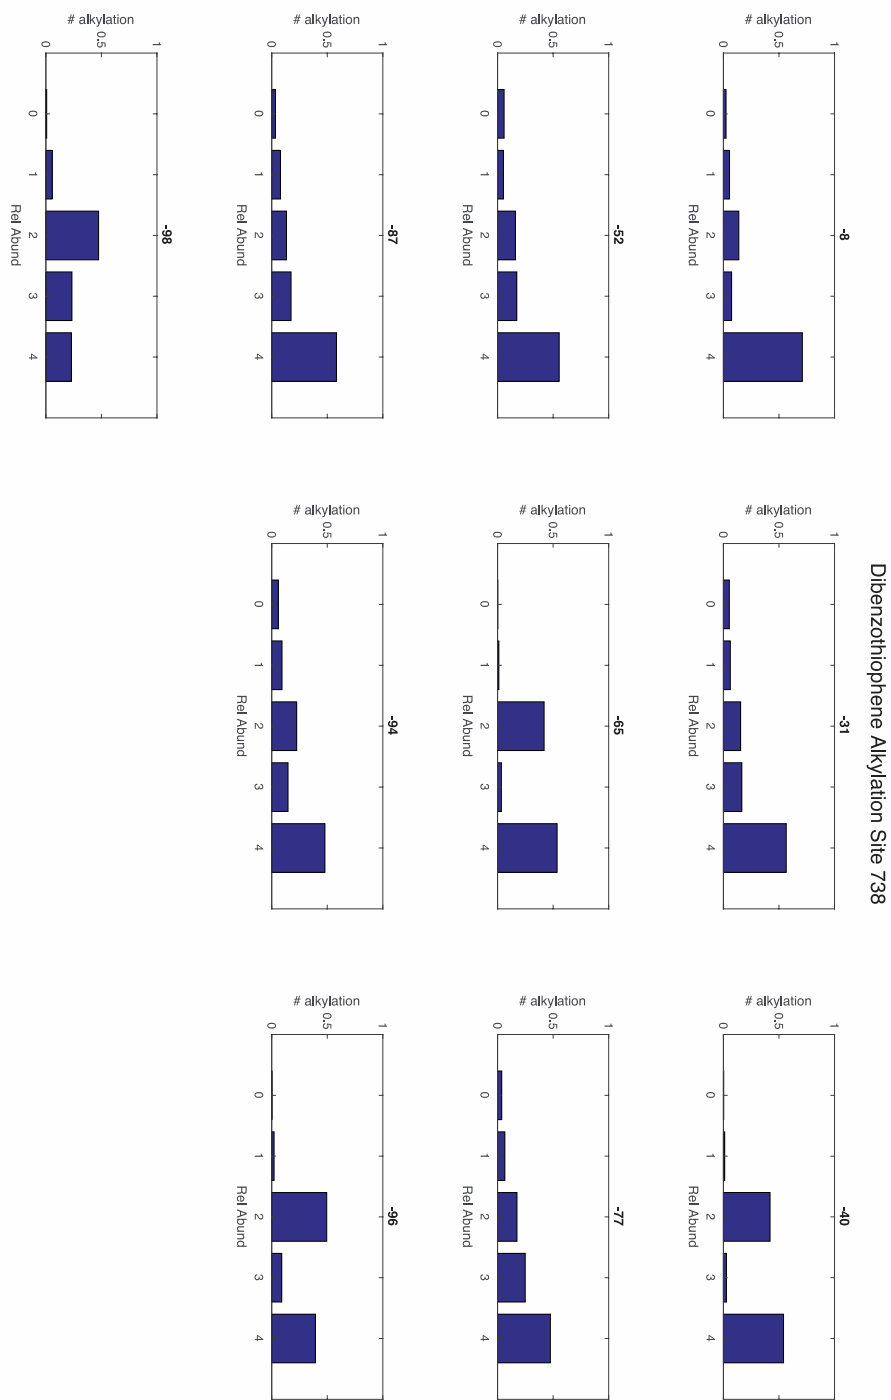

979  
 980 **Supplemental Figure S22.** Relative abundances of alkylated dibenzothiophenes from Site 738 at  
 981 Kerguelen Plateau demonstrate a heightened abundance of alkylated dibenzothiophenes relative  
 982 to the non-alkylated parent form. Most signatures are consistent with a weathered, source.  
 983 Numbers on the x-axis represent the number of methylations, and the y-axis is the relative  
 984 abundance of each compound relative to the sum of 0-4 alkylated isomers. Numbers at the top of  
 985 each plot represent the depth in Section 738C-20R-5.  
 986



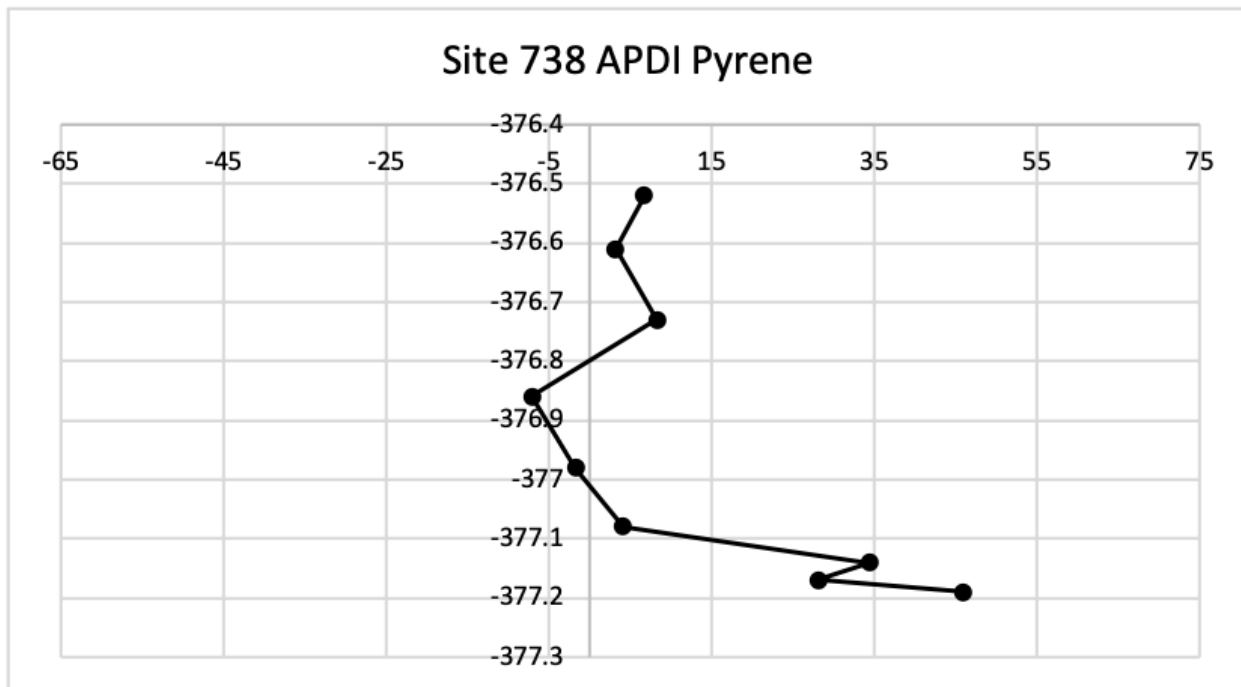

987  
 988  
 989  
 990  
 991  
 992  
 993  
 994  
 995  
 996  
 997

**Supplemental Figure S23.** The Alkylated PAH Distribution Index (51) based on the homologous series of pyrenes presents a shift from positive, “pyrogenic” values to mixed source values at Site 738. The y-axis represents depth (mbsf) at Site 738, and the y-axis is the Pyrene APDI. Negative values indicate a petrogenic source, positive values indicate a pyrogenic source, and values near 0 represent mixed or undiscernible sources.

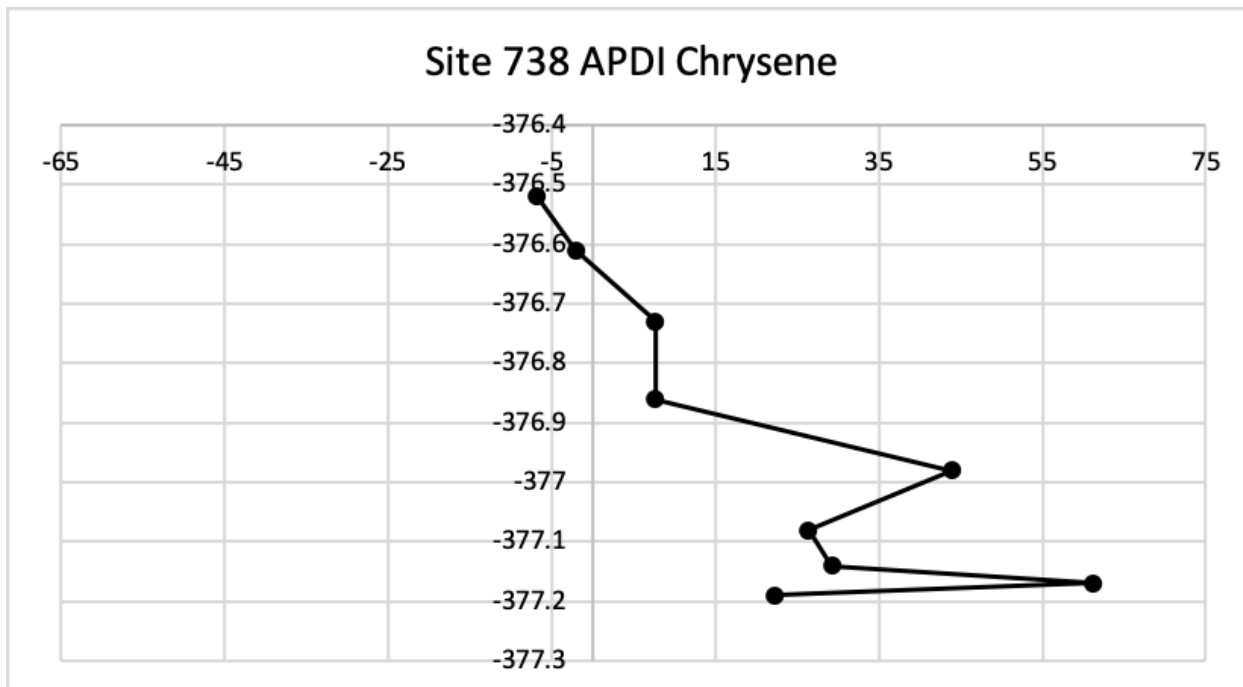

998  
999

1000 **Supplemental Figure S24.** The Alkylated PAH Distribution Index (51) based on the  
 1001 homologous series of chrysenes presents a shift from positive, “pyrogenic” values to mixed  
 1002 source values at Site 738. The y-axis represents depth (mbsf) at Site 738, and the y-axis is the  
 1003 Chrysene APDI. Negative values indicate a petrogenic source, positive values indicate a  
 1004 pyrogenic source, and values near 0 represent mixed or undiscernible sources.

1005  
1006  
1007  
1008

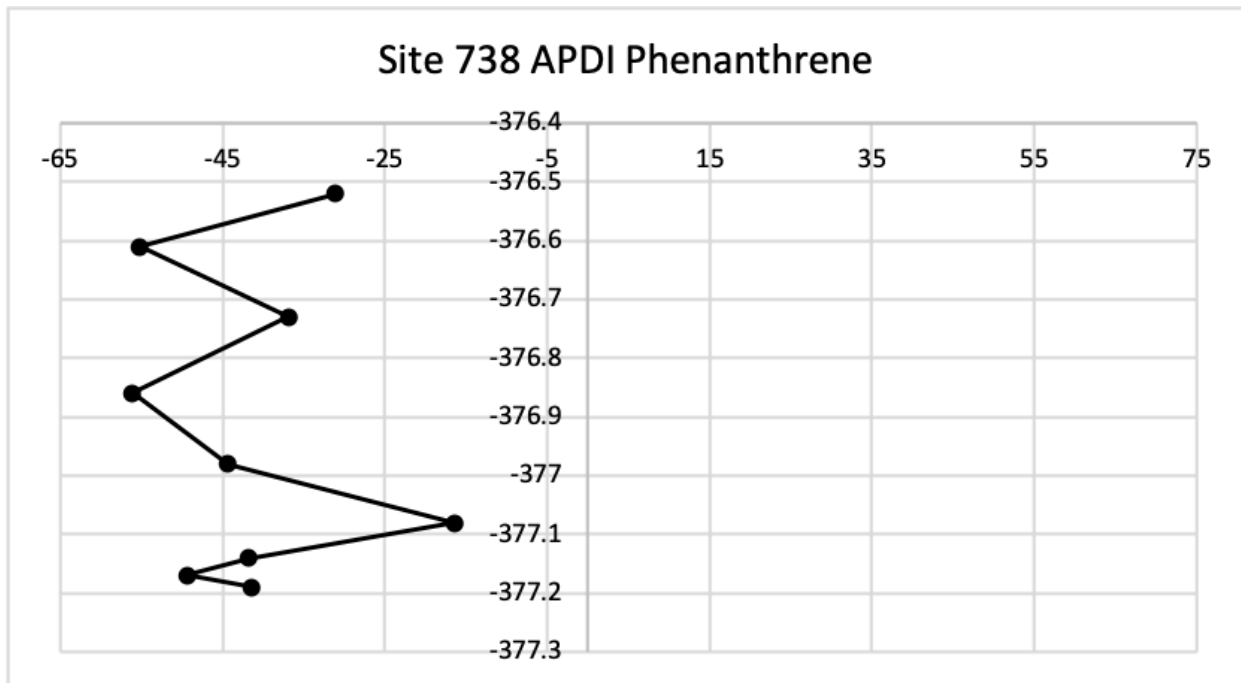

1009  
 1010  
 1011  
 1012  
 1013  
 1014  
 1015  
 1016  
 1017  
 1018

**Supplemental Figure S25.** The Alkylated PAH Distribution Index (51) based on the homologous series of phenanthrenes presents negative, “petrogenic” source values at Site 738. The y-axis represents depth (mbsf) at Site 738, and the x-axis is the Phenanthrene APDI. Negative values indicate a petrogenic source, positive values indicate a pyrogenic source, and values near 0 represent mixed or undiscernible sources.

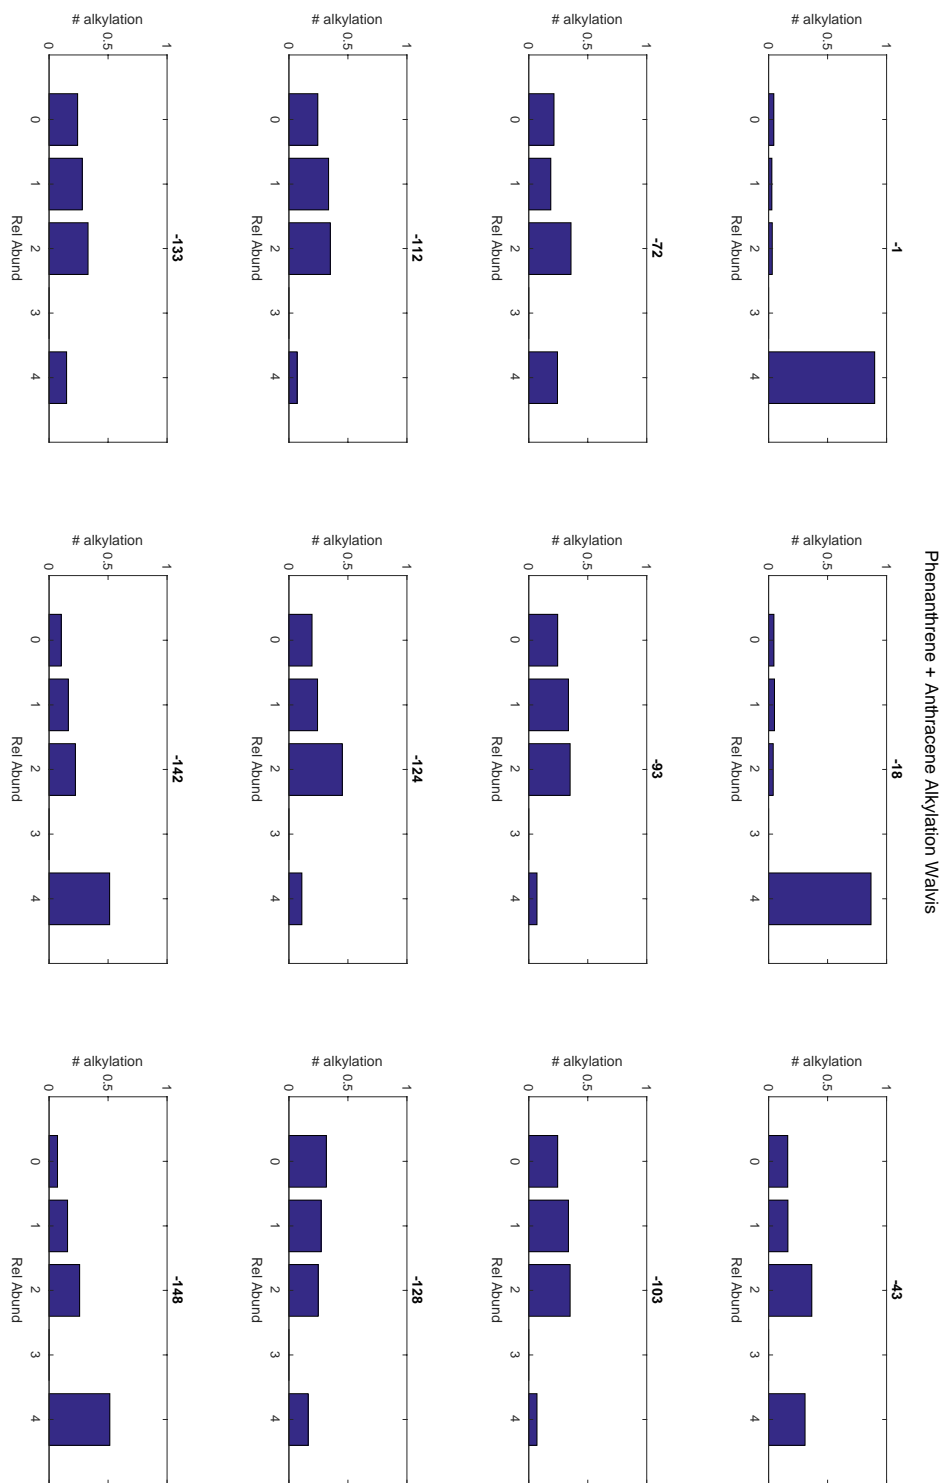

1019  
 1020 **Supplemental Figure S26.** Relative abundances of alkylated phenanthrenes from Site 1262 at  
 1021 Walvis Ridge demonstrate a heightened to equal abundances of alkylated phenanthrenes relative  
 1022 to the non-alkylated parent form. Most signatures are consistent with a weathered or petrogenic  
 1023 source. Numbers on the x-axis represent the number of methylations, and the y-axis is the  
 1024 relative abundance of each compound relative to the sum of 0-4 alkylated isomers. Numbers at  
 1025 the top of each plot represent the depth in Section 1262B-22H-4.

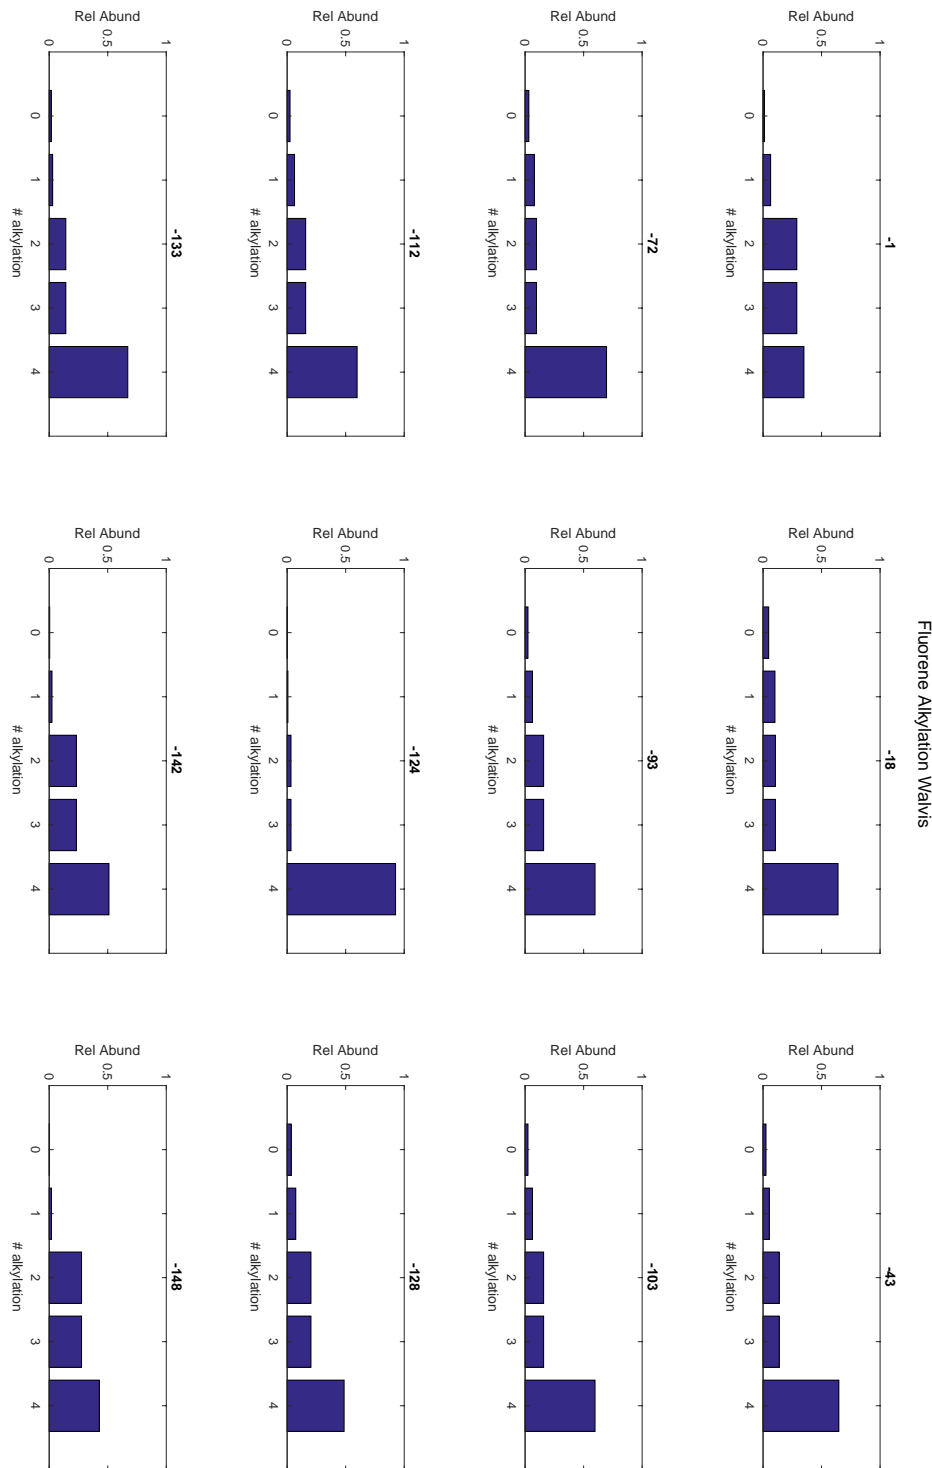

1026  
 1027 **Supplemental Figure S27.** Relative abundances of alkylated fluorenes from Site 1262 at Walvis  
 1028 Ridge demonstrate a heightened to equal abundances of alkylated fluorenes relative to the non-  
 1029 alkylated parent form. Most signatures are consistent with a weathered source. Numbers on the  
 1030 x-axis represent the number of methylations, and the y-axis is the relative abundance of each  
 1031 compound relative to the sum of 0-4 alkylated isomers. Numbers at the top of each plot represent  
 1032 the depth in Section 1262B-22H-4.

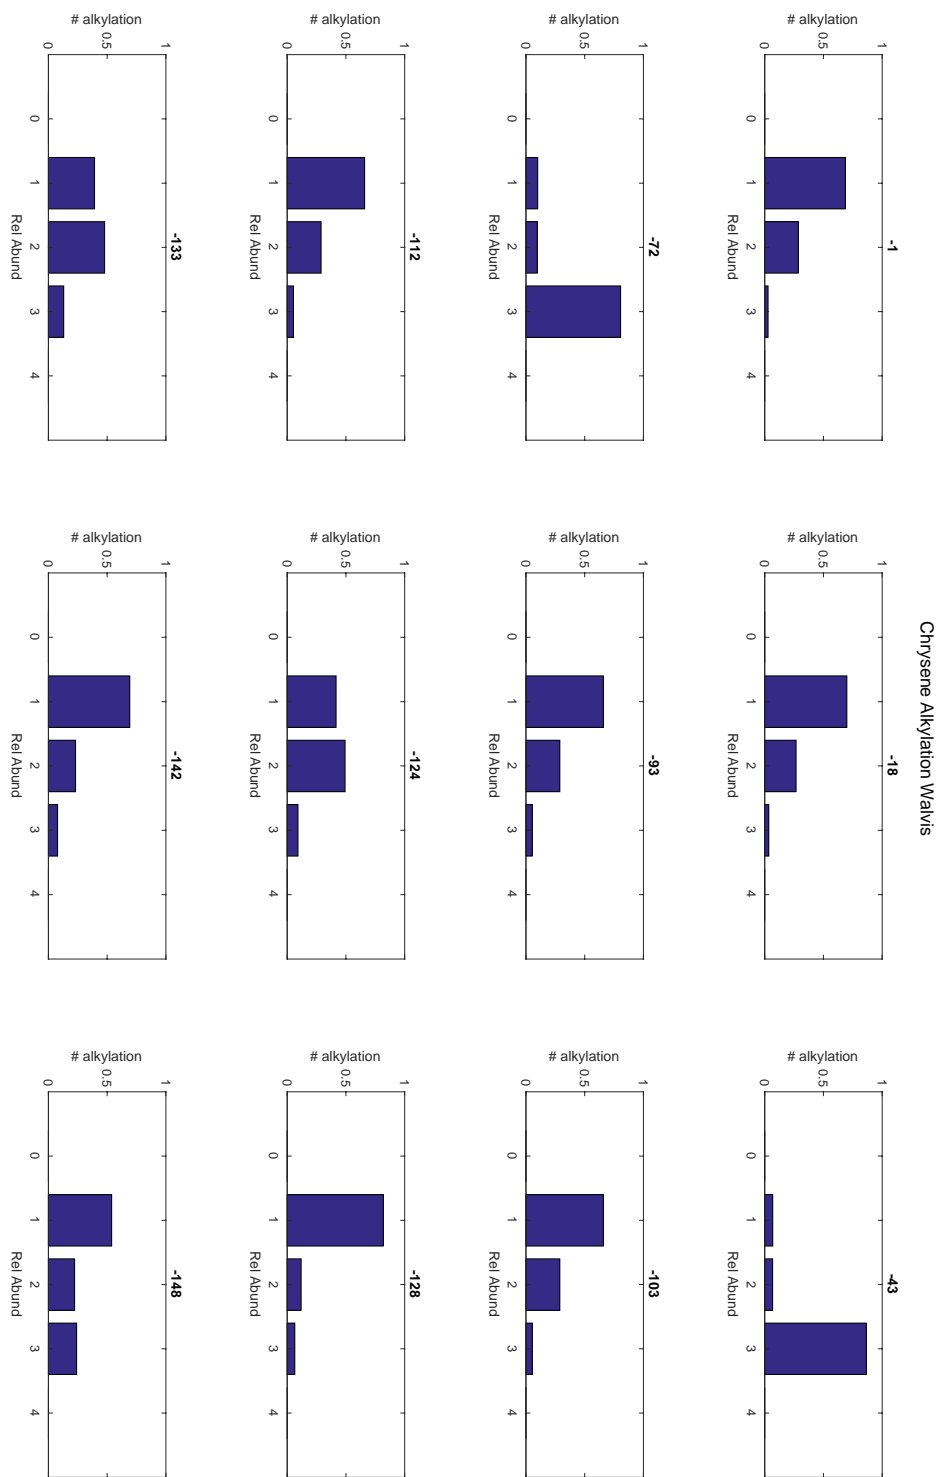

1033  
 1034 **Supplemental Figure S28.** Relative abundances of alkylated chrysenes from Site 1262 at  
 1035 Walvis Ridge demonstrate a heightened abundance of alkylated chrysenes relative to the non-  
 1036 alkylated parent form. Most signatures are consistent with a petrogenic source. Numbers on the  
 1037 x-axis represent the number of methylations, and the y-axis is the relative abundance of each  
 1038 compound relative to the sum of 0-4 alkylated isomers. Numbers at the top of each plot represent  
 1039 the depth in Section 1262B-22H-4.

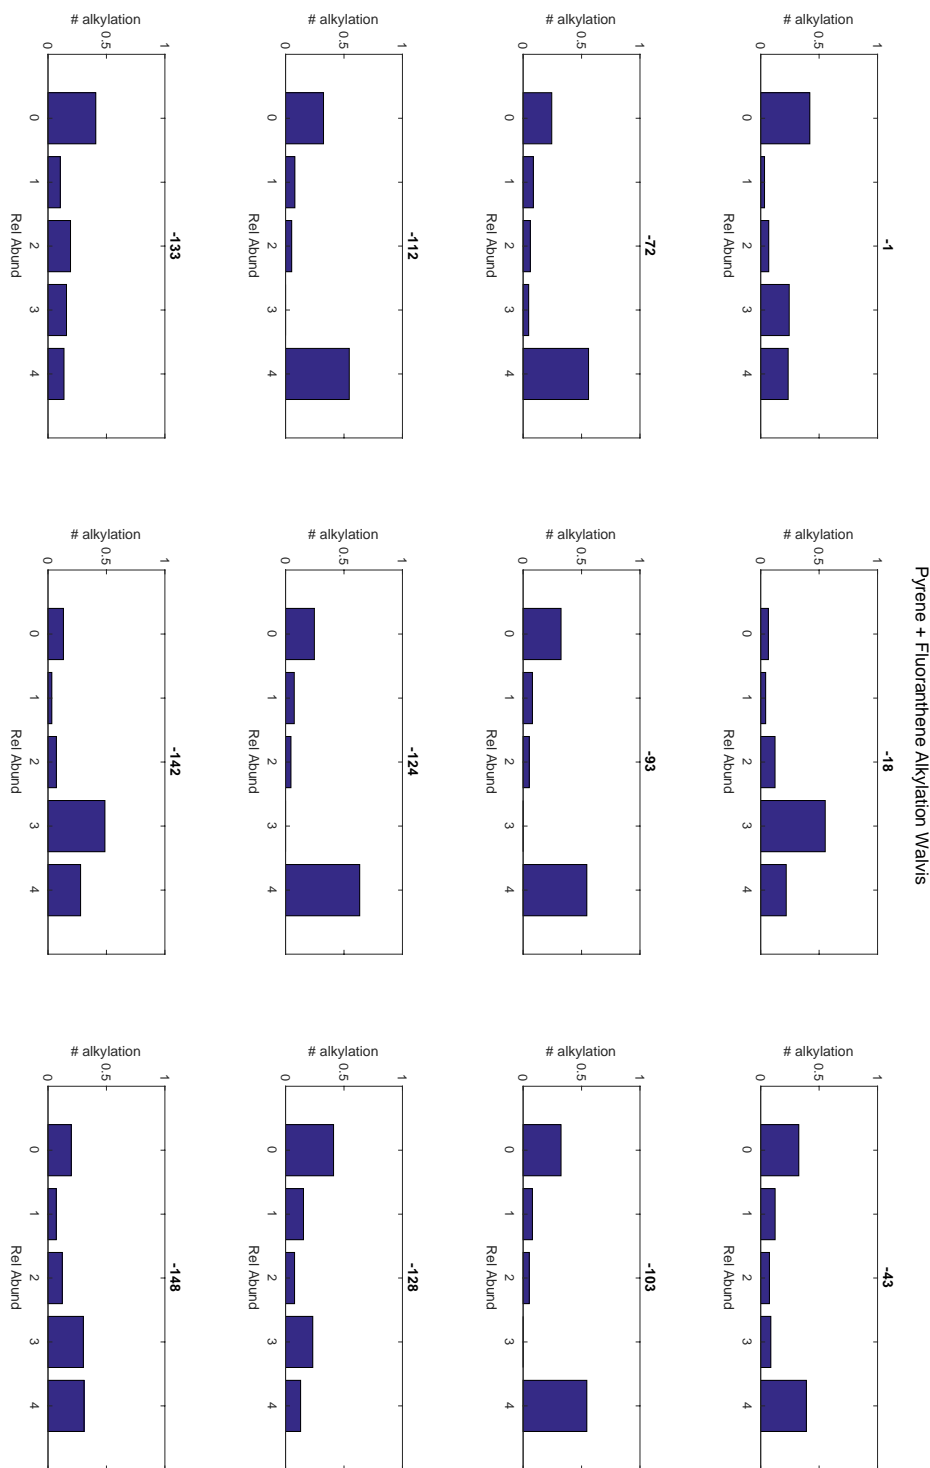

Pyrene + Fluoranthene Alkylation Walvis

1040  
 1041 **Supplemental Figure S29.** Relative abundances of alkylated pyrenes from Site 1262 at Walvis  
 1042 Ridge demonstrate mixed abundances of alkylated phenanthrenes relative to the non-alkylated  
 1043 parent form. Signatures range from petrogenic to pyrogenic; most appear weathered. Numbers on  
 1044 the x-axis represent the number of methylations, and the y-axis is the relative abundance of each  
 1045 compound relative to the sum of 0-4 alkylated isomers. Numbers at the top of each plot represent  
 1046 the depth in Section 1262B-22H-4.

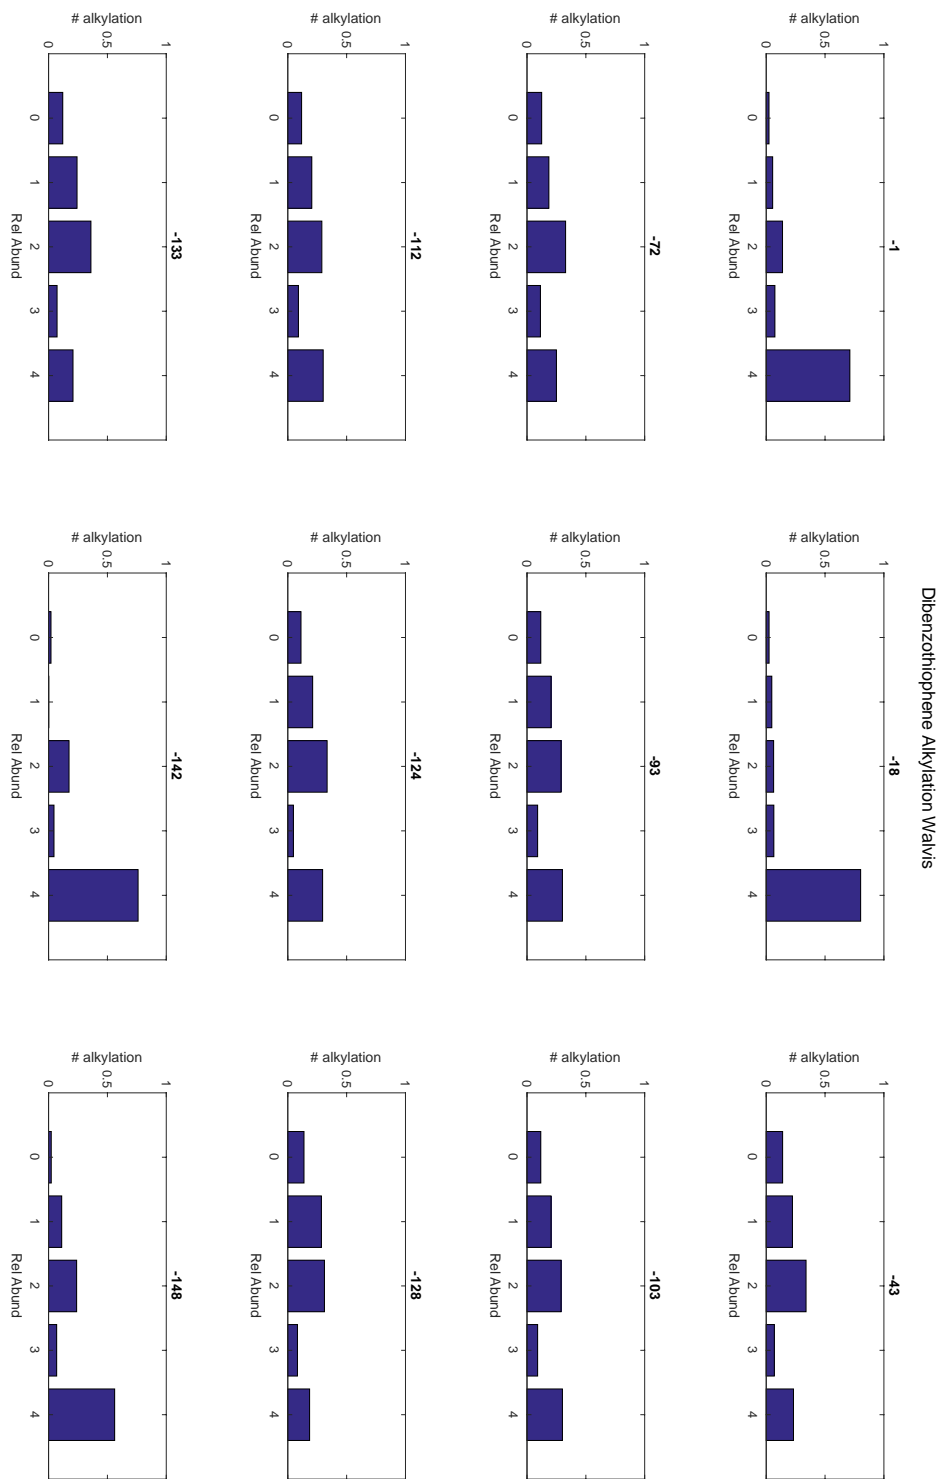

1047  
 1048 **Supplemental Figure S30.** Relative abundances of alkylated dibenzothiophenes from Site 1262  
 1049 at Walvis Ridge demonstrate a heightened abundance of alkylated dibenzothiophenes relative to  
 1050 the non-alkylated parent form. Most signatures are consistent with a weathered or petrogenic  
 1051 source. Numbers on the x-axis represent the number of methylations, and the y-axis is the  
 1052 relative abundance of each compound relative to the sum of 0-4 alkylated isomers. Numbers at  
 1053 the top of each plot represent the depth in Section 1262B-22H-4.



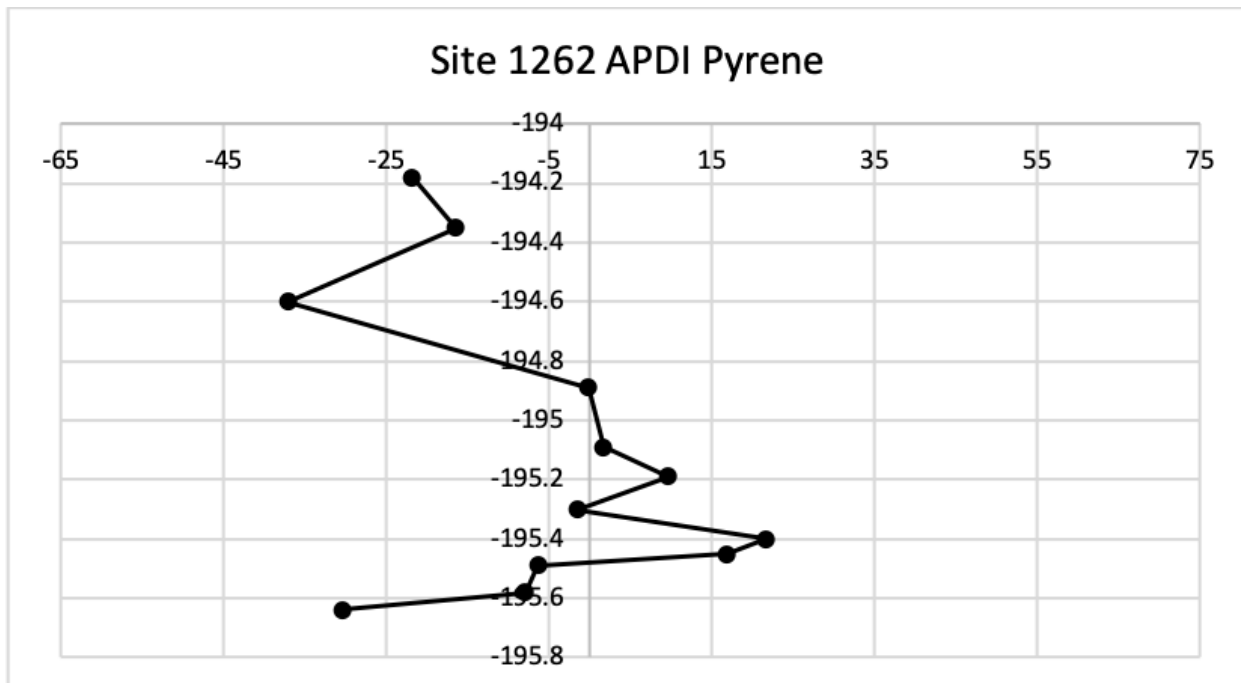

1054  
 1055  
 1056  
 1057  
 1058  
 1059  
 1060  
 1061  
 1062  
 1063  
 1064

**Supplemental Figure S31.** The Alkylated PAH Distribution Index (51) based on the homologous series of pyrenes presents negative, “petrogenic” source values in the K-Pg boundary layer at Site 1262, shifting to mixed or pyrogenic signatures, and back to mixed values. The y-axis represents depth (mbsf) at Site 1262, and the y-axis is the Pyrene APDI. Negative values indicate a petrogenic source, positive values indicate a pyrogenic source, and values near 0 represent mixed or indiscernible sources.

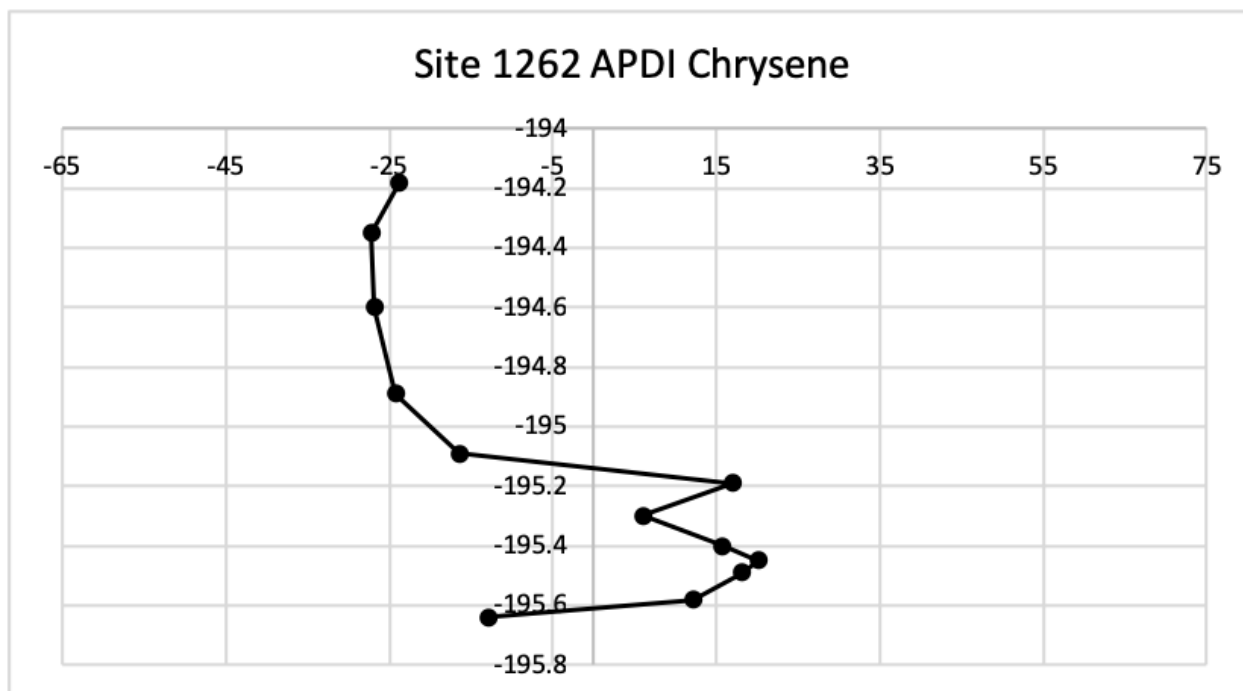

1065  
 1066  
 1067  
 1068  
 1069  
 1070  
 1071  
 1072  
 1073  
 1074  
 1075

**Supplemental Figure S32.** The Alkylated PAH Distribution Index (51) based on the homologous series of chrysenes presents negative, “petrogenic” source values in the K-Pg boundary layer at Site 1262, shifting to mixed or pyrogenic signatures, and back to petrogenic values. The y-axis represents depth (mbsf) at Site 1262, and the x-axis is the Chrysene APDI. Negative values indicate a petrogenic source, positive values indicate a pyrogenic source, and values near 0 represent mixed or indiscernible sources.

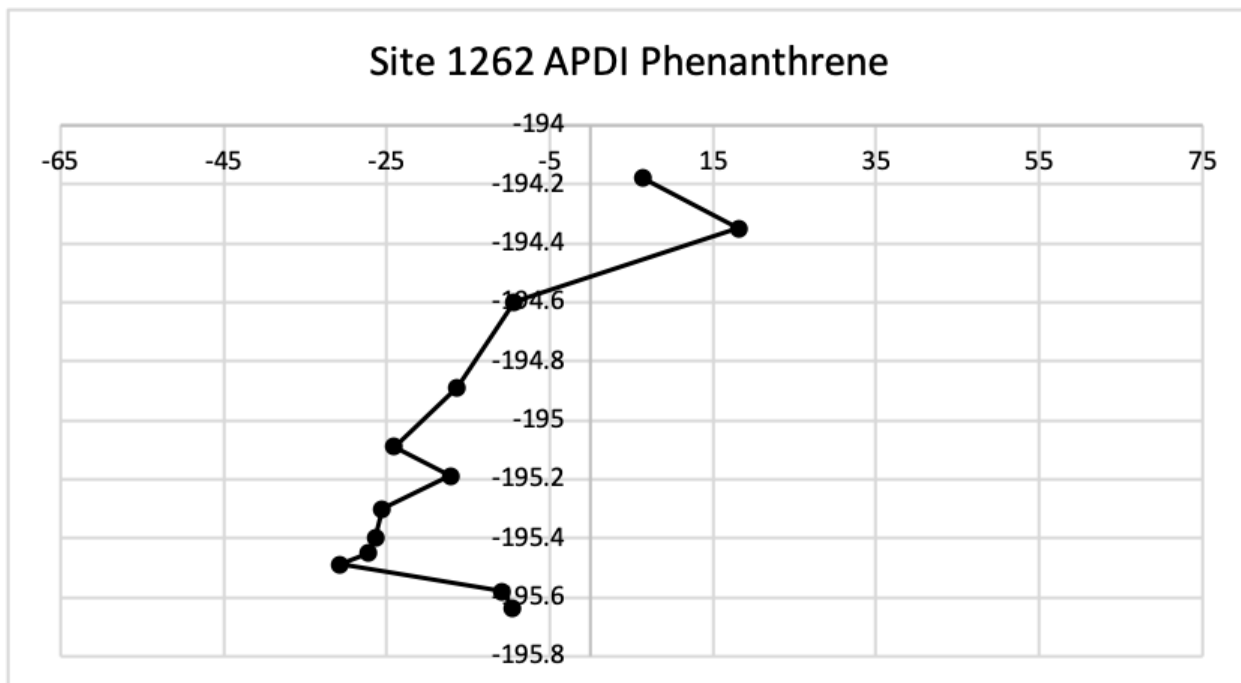

1076  
1077

1078 **Supplemental Figure S33.** The Alkylated PAH Distribution Index (51) based on the  
 1079 homologous series of phenanthrene presents negative, “petrogenic” to positive “pyrogenic”  
 1080 sources. The y-axis represents depth (mbsf) at Site 1262, and the y-axis is the Phenanthrene  
 1081 APDI. Negative values indicate a petrogenic source, positive values indicate a pyrogenic source,  
 1082 and values near 0 represent mixed or undiscernible sources.

1083  
1084  
1085

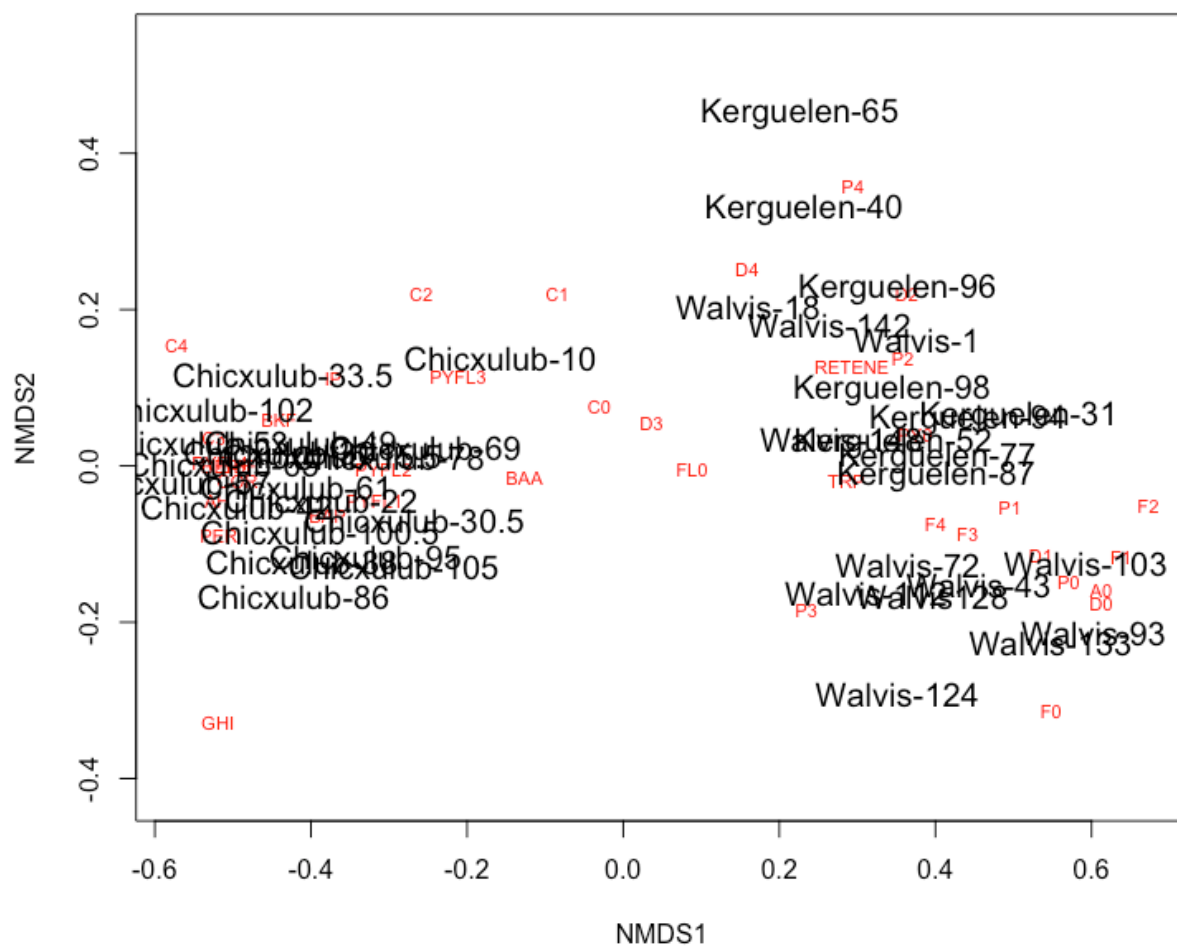

1086  
 1087 **Supplemental Figure S34.** Results from Q mode Nonmetric Multidimensional Scaling  
 1088 (NMDS). Samples are displayed in black, in the format of “Site Name – Depth,” where the depth  
 1089 refers to the depth in each core section (0077-40R-1 for Chicxulub, 738C-20R-5 for Kerguelen  
 1090 Plateau, and 1262B-22H-4 for Walvis Ridge). Variables, PAHs in this case, are displayed in  
 1091 black. The number refers to the number of alkylations.  
 1092  
 1093

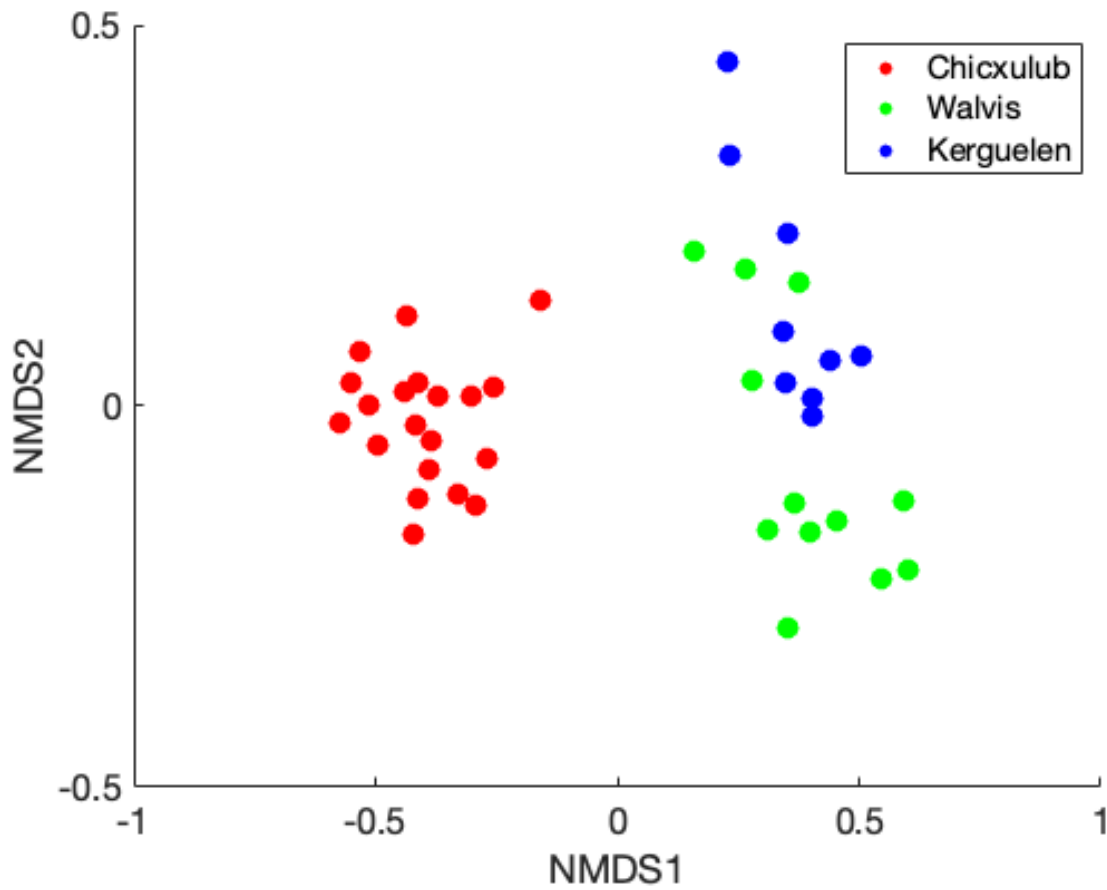

1094  
 1095  
 1096  
 1097  
 1098  
 1099  
 1100

**Supplemental Figure S35.** Q mode NMDS results colored by location. Only samples are displayed, where Chicxulub (Site M0077) samples are colored in red, Walvis Ridge samples (Site 1262) are colored in green, and Kerguelen Plateau samples (Site 738) are colored in blue. Separation between Site M0077 and the two distal sites is observed on NMDS1, and separation between Site 738 and Site 1262 is observed on NMDS2.

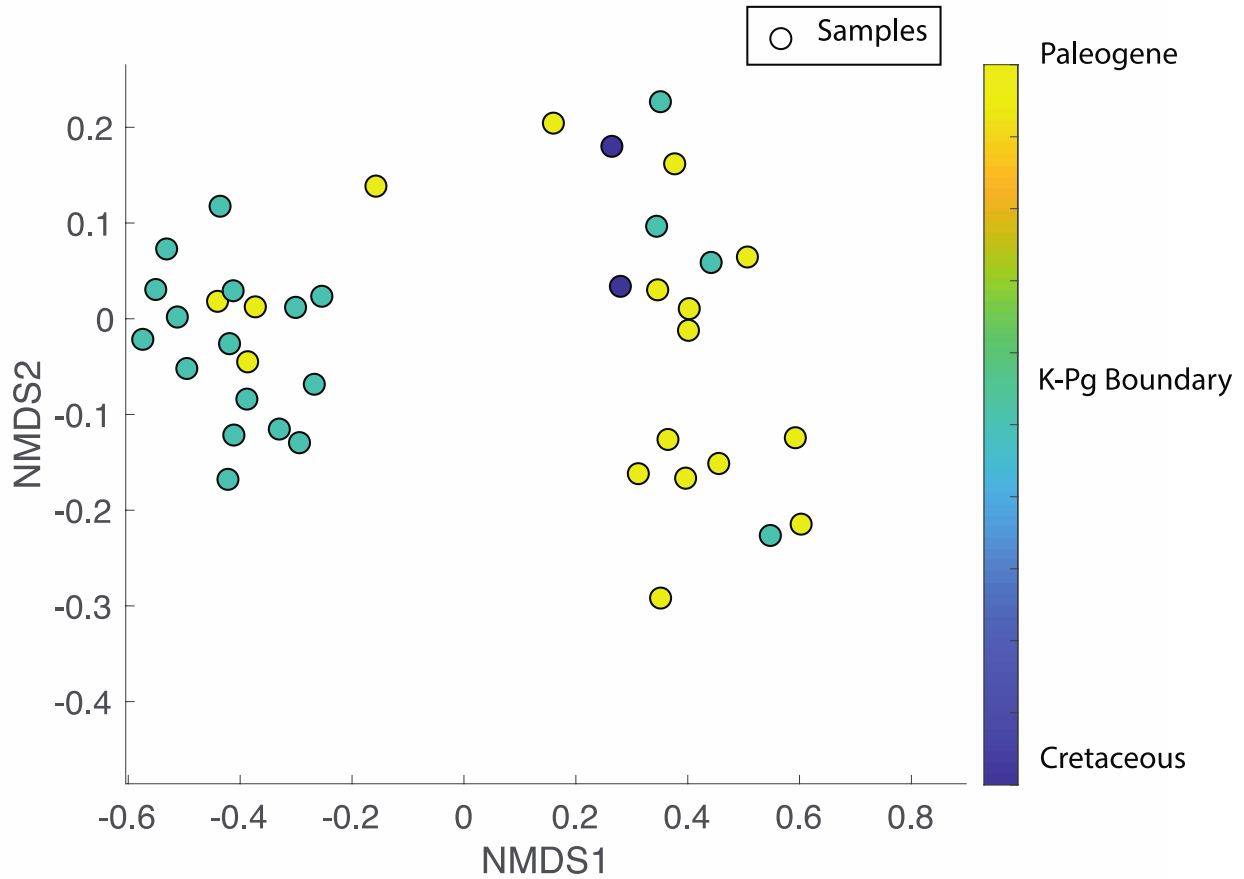

1101  
 1102  
 1103  
 1104  
 1105  
 1106  
 1107  
 1108  
 1109

**Supplemental Figure S36.** Q mode NMDS results colored by timing. Only samples are displayed, where K-Pg boundary samples (“1”) are displayed in green, Cretaceous samples (“0”) are displayed in blue, and Paleogene samples (“2”) are displayed in yellow. We do not observe a major separation within the NMDS based on timing.

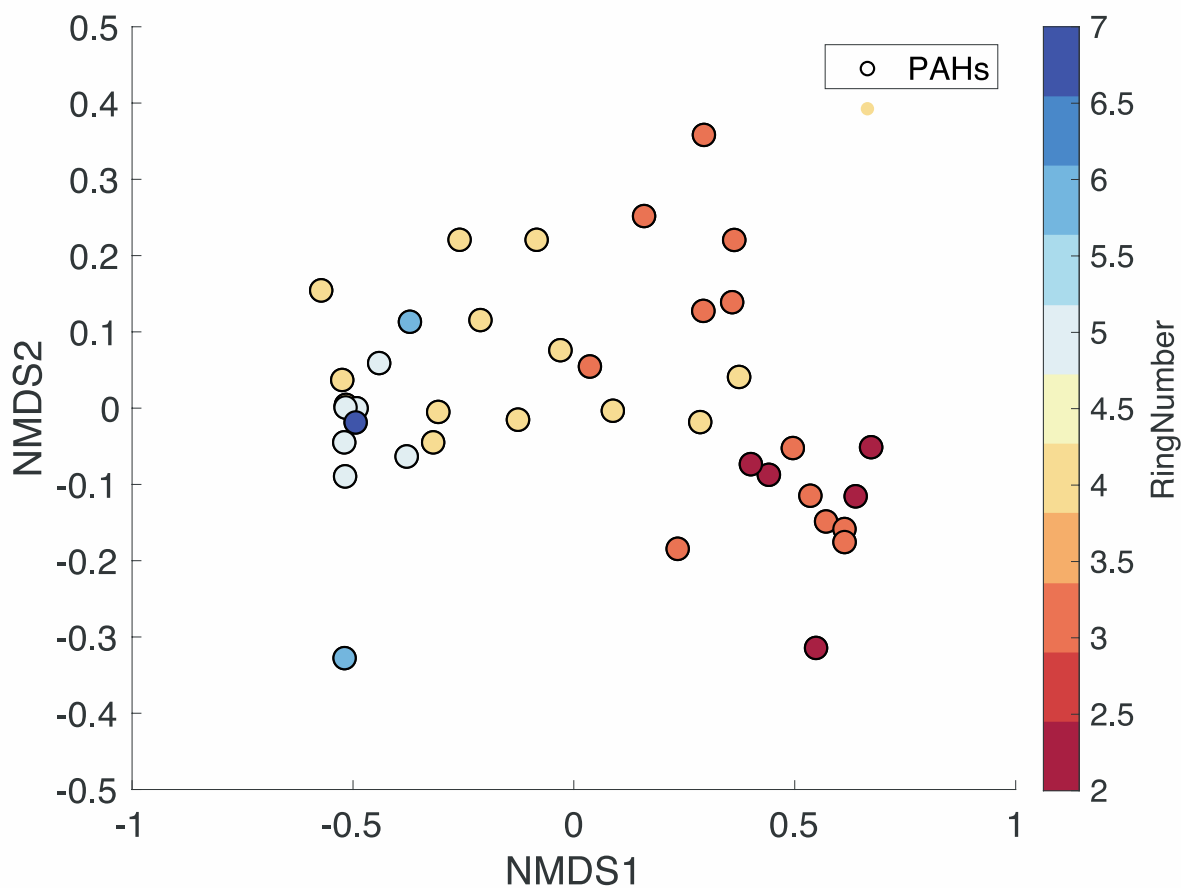

1110  
 1111 **Supplemental Figure S37.** Q mode NMDS results colored by ring number of PAHs. Only  
 1112 variables (PAHs) are displayed, where the color of each point corresponds to the number of rings  
 1113 of the compound. Warm colors represent small, lower ring number PAHs, where the smallest is  
 1114 fluorene, and cool colors represent larger PAHs, where the largest is coronene. A PAH size  
 1115 gradient is observed along NMDS1, where larger PAHs load negatively and smaller PAHs load  
 1116 positively on NMDS1. We suggest this is a function of transport propensity.  
 1117  
 1118  
 1119

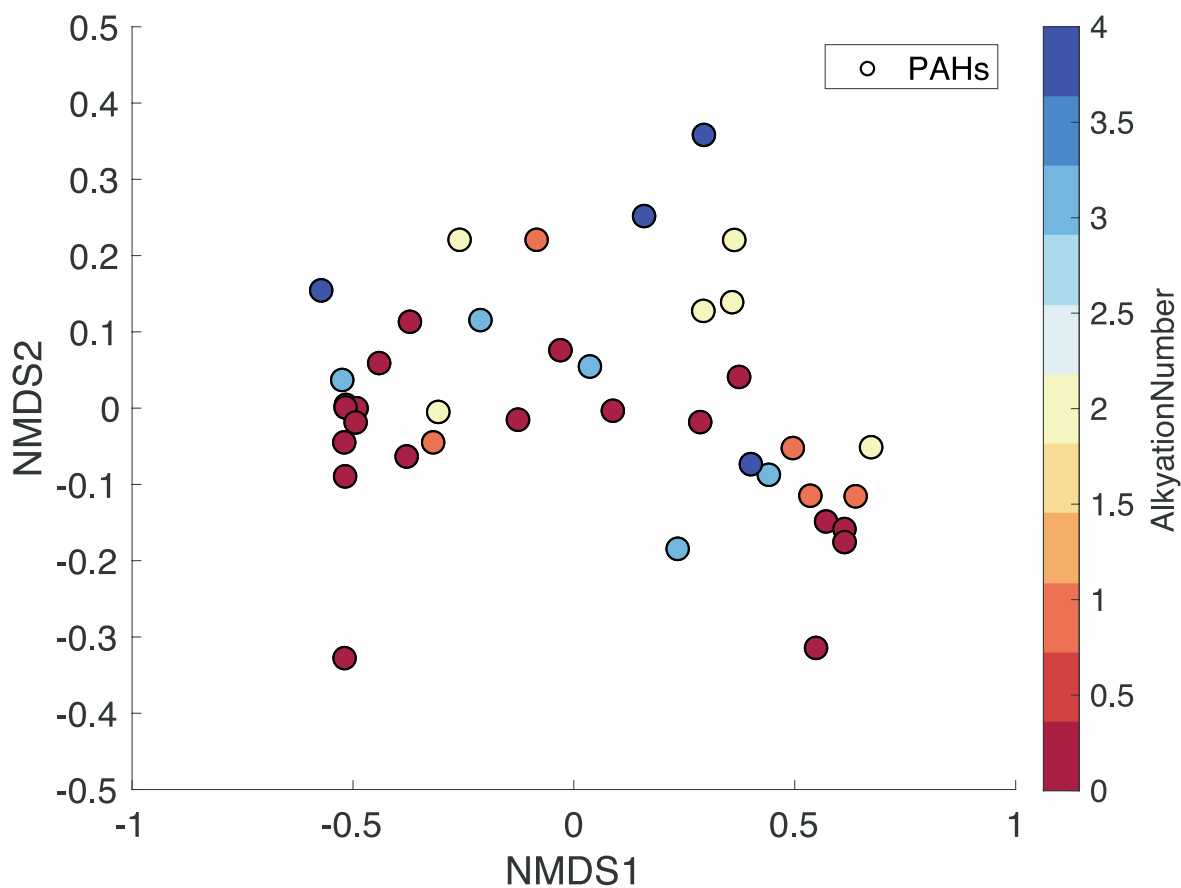

1120  
 1121 **Supplemental Figure S38.** Q mode NMDS results colored by the number of alkylations on each  
 1122 PAH species. Only variables (PAHs) are displayed, where warm colors represent parent, non-  
 1123 alkylated species, and cool colors progressively represent more alkylated species. A slightly more  
 1124 negative loading on NMDS2 is observed for parent (non-alkylated) species, and a slightly more  
 1125 positive loading is observed for more alkylated species. There are no differences on NMDS1,  
 1126 and thus no differences controlling the distribution between sites.  
 1127  
 1128  
 1129



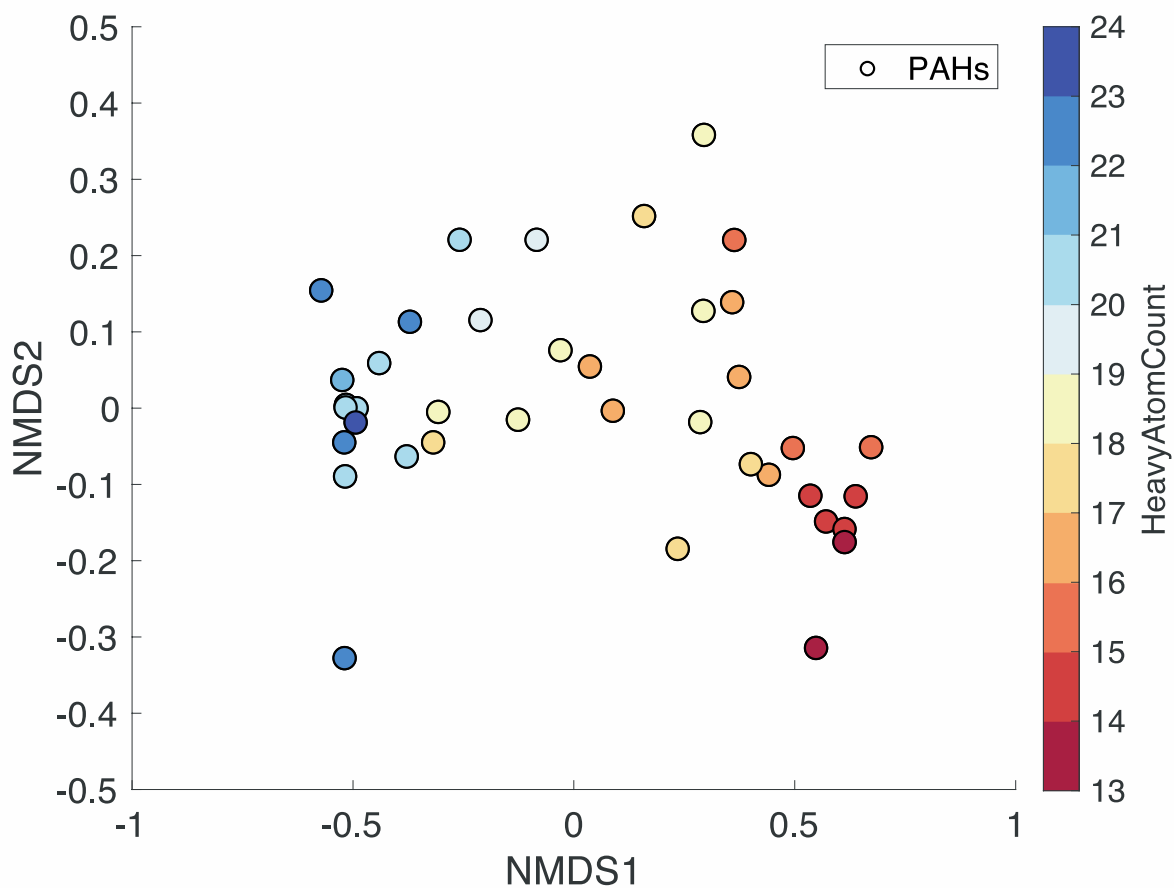

1130  
 1131  
 1132  
 1133  
 1134  
 1135  
 1136  
 1137  
 1138

**Supplemental Figure S39.** Q mode NMDS results colored by the number of heavy atoms on each PAH species. Heavy atom count is associated with molecular weight (more heavy atoms, heavier compound) and also transport (more heavy atoms, less susceptible to transport)- we can summarize the association with NMDS1 and heavy atom count to transport. Heavy atoms in this dataset include carbon and sulfur. Warm colors represent fewer heavy atoms, cool colors represent more heavy atoms.

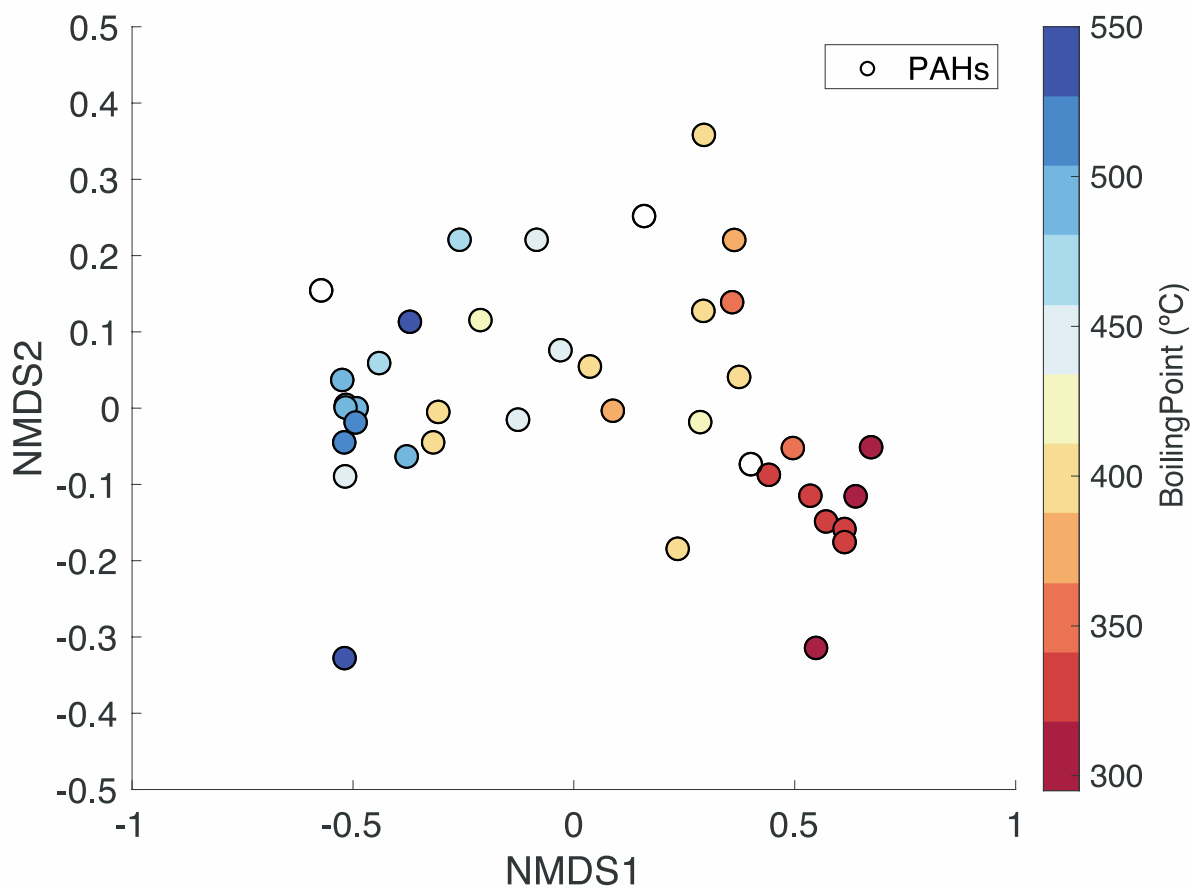

1139  
 1140 **Supplemental Figure S40.** Q mode NMDS results colored by the boiling point of each PAH  
 1141 species. Only variables (PAHs) are displayed. Positively loading on NMDS1 are low boiling  
 1142 point compounds (warm colors), which are also associated with the distal sites. Loading  
 1143 negatively on NMDS1 are the high boiling point compounds (less likely to be in the vapor)-  
 1144 associated with the Chicxulub samples (cool colors). Boiling point and transport dynamics are  
 1145 linked.  
 1146

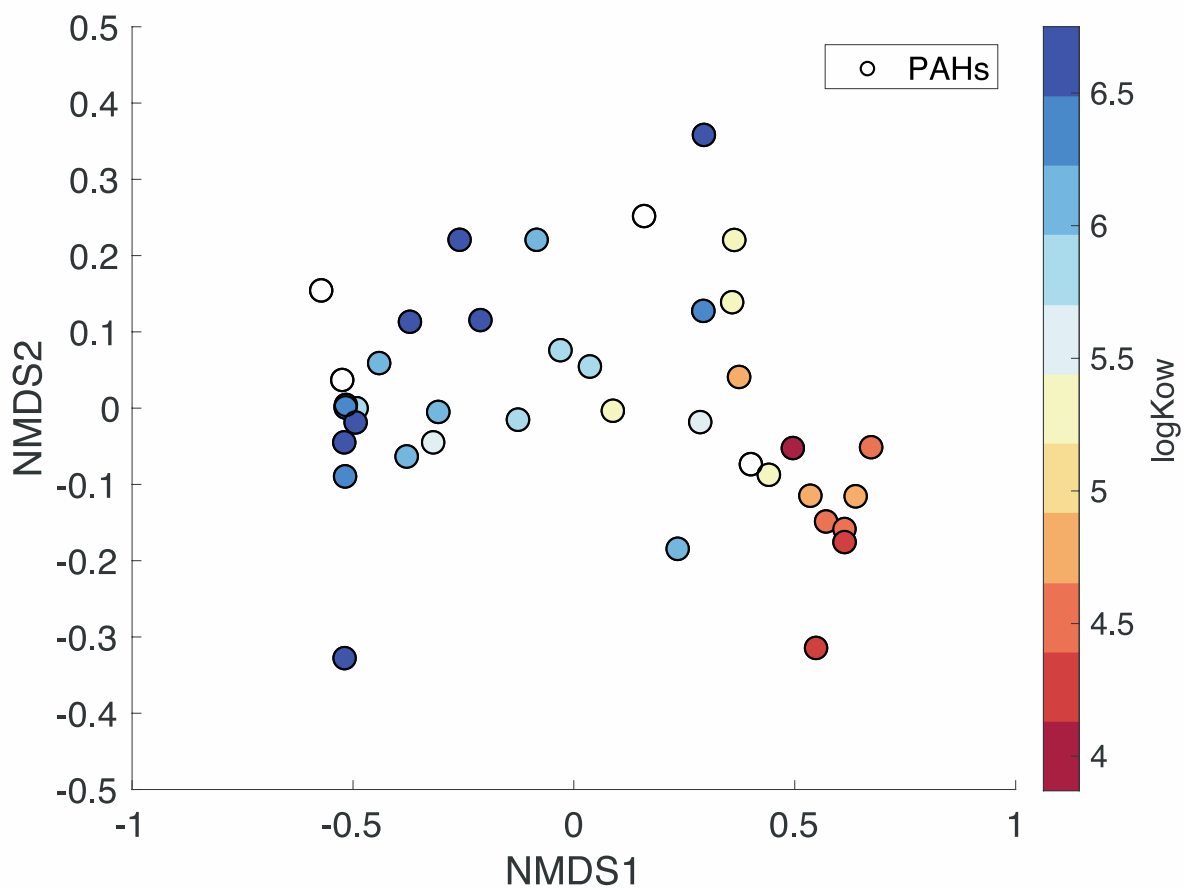

1147  
 1148 **Supplemental Figure S41.** Q mode NMDS results colored by the  $\log K_{ow}$  of each PAH species.  
 1149 Only variables (PAHs) are displayed. NMDS1 separates low  $\log K_{ow}$  (positive loadings /  
 1150 associated with distal sites / warm colors) and high  $\log K_{ow}$  (negative loadings / associated with  
 1151 Chicxulub samples / cool colors). Higher  $\log K_{ow}$  means that a sample is more likely to associate  
 1152 with an organic phase than a water, indicating less water-soluble compounds. Low  $\log K_{ow}$  values  
 1153 represent relatively more water-soluble compounds with increased susceptibility to transport.

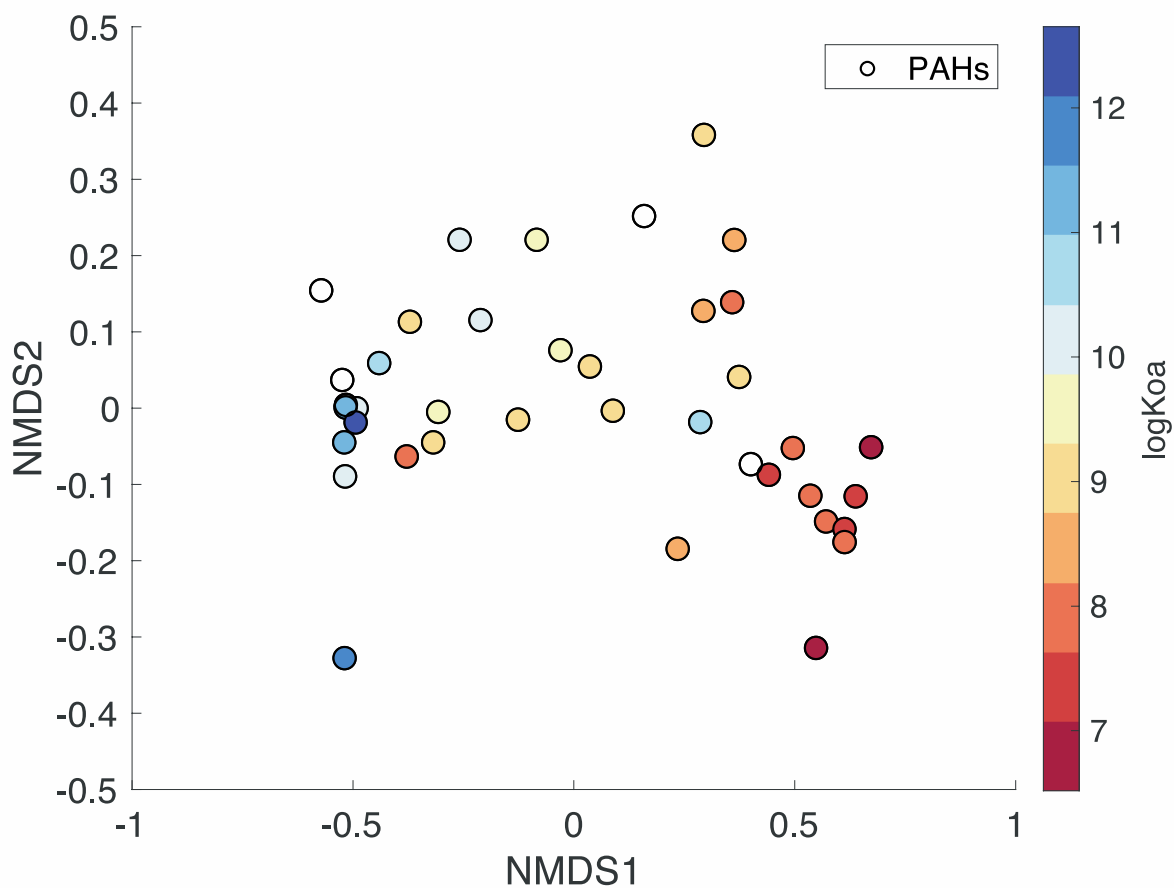

1154 **Supplemental Figure S42.** Q mode NMDS results colored by the  $\log K_{oa}$  of each PAH species.  
 1155 Only variables (PAHs) are displayed. NMDS1 separates low  $\log K_{oa}$  (positive loadings /  
 1156 associated with distal sites / warm colors) and high  $\log K_{oa}$  (negative loadings / associated with  
 1157 Chicxulub samples / cool colors). Higher  $\log K_{oa}$  means that a sample is more likely to associate  
 1158 with an organic phase than an air phase, indicating less volatile compounds. Low  $\log K_{oa}$  values  
 1159 represent relatively more volatile compounds with increased susceptibility to transport.  
 1160  
 1161  
 1162

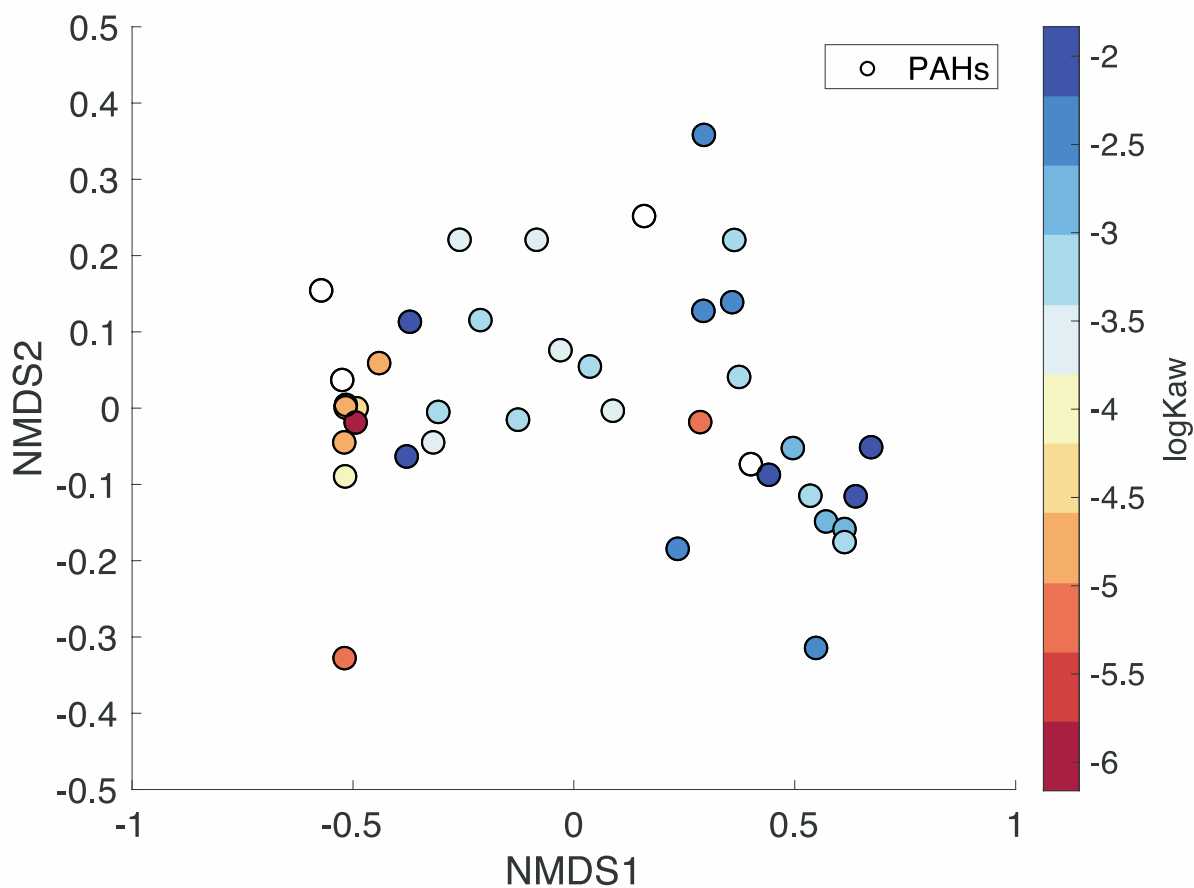

1163  
 1164  
 1165  
 1166  
 1167  
 1168  
 1169  
 1170  
 1171

**Supplemental Figure S43.** Q mode NMDS results colored by the  $\log K_{aw}$  each PAH species. Only variables (PAHs) are displayed. PAHs with high  $\log K_{aw}$  values load positively on NMDS1, whereas PAHs with low  $\log K_{aw}$  values load negatively on NMDS1. Warm colors represent lower  $\log K_{aw}$  PAHs, and cool colors represent higher  $\log K_{aw}$  PAHs. As  $\log K_{aw}$  increases, the more likely a compound is to associate with air over water, and thus the more volatile the compound.

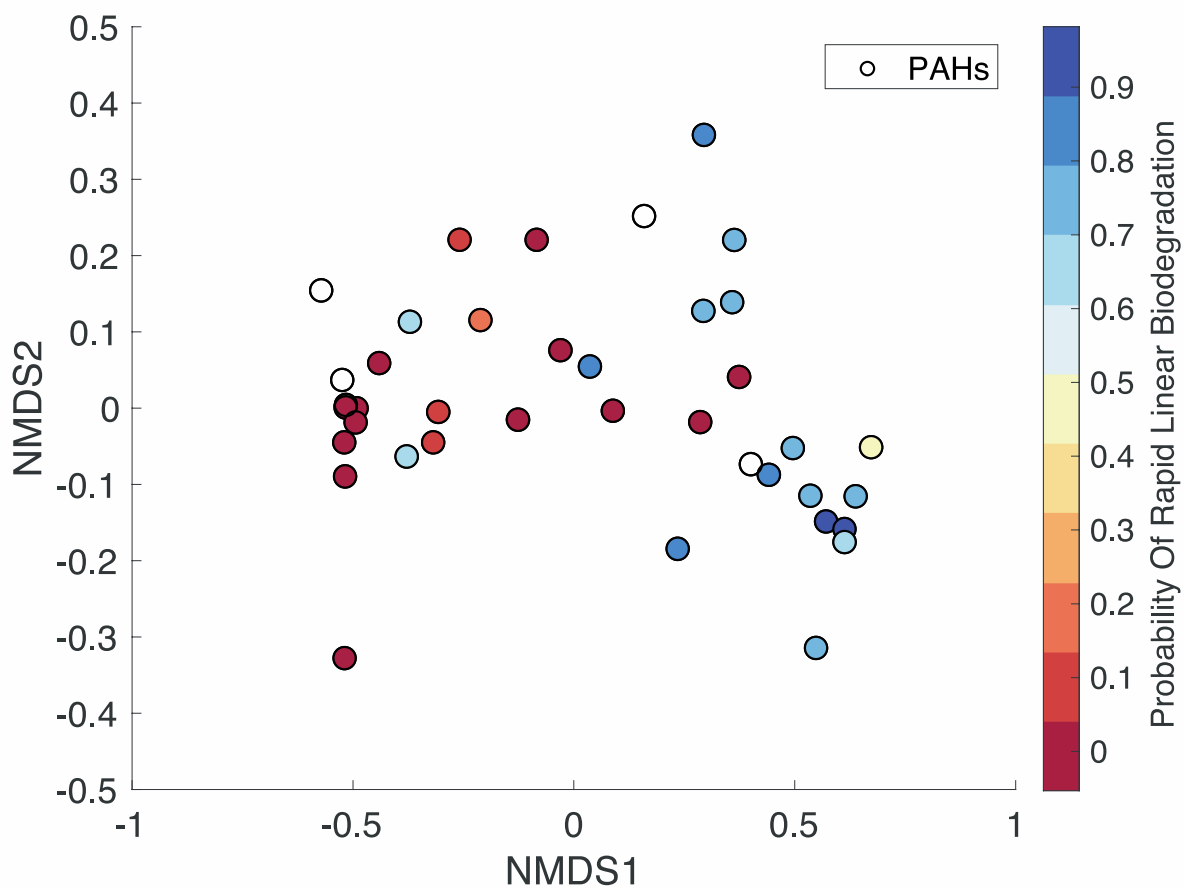

1172  
 1173 **Supplemental Figure S44.** Q mode NMDS results colored by the probability of linear  
 1174 biodegradation of each PAH species. Only variables (PAHs) are displayed. Smaller PAHs that  
 1175 load more positively on NMDS1 have higher probabilities of degradation (cool colors), whereas  
 1176 more recalcitrant PAHs load negatively on NMDS1, and are typically larger compounds (warm  
 1177 colors). NMDS1 may act as a degradation gradient, where samples loading positively on  
 1178 NMDS1 are less biodegraded and samples loading negatively on NMDS1 are more biodegraded.  
 1179  
 1180

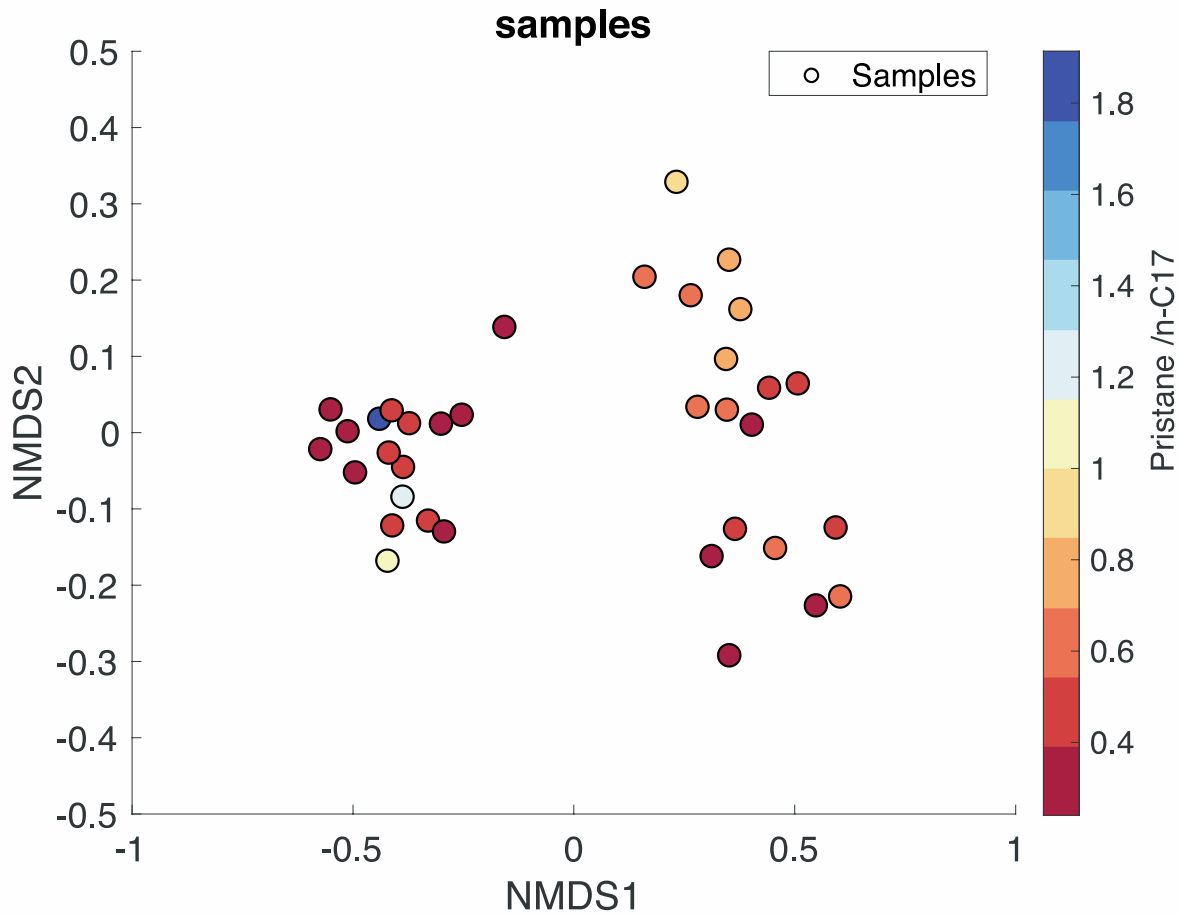

1181  
 1182  
 1183  
 1184  
 1185  
 1186  
 1187  
 1188  
 1189  
 1190  
 1191

**Supplemental Figure S45.** Q mode NMDS results colored by the Pristane/n-C<sub>17</sub> (Pr/17) value of each sample. Only samples are displayed. The Pr/17 ratio is higher in more biodegraded samples and lower in less biodegraded samples, as isoprenoids (such as pristane) are less biodegradable than alkanes. Warm colors represent lower Pr/17 ratios, cool colors represent higher Pr/17 ratios. We do not observe any association between the Pr/17 biodegradation index and NMDS1. Thus, we conclude that transport, and not biodegradation of samples, is what controls sample distribution along NMDS1.

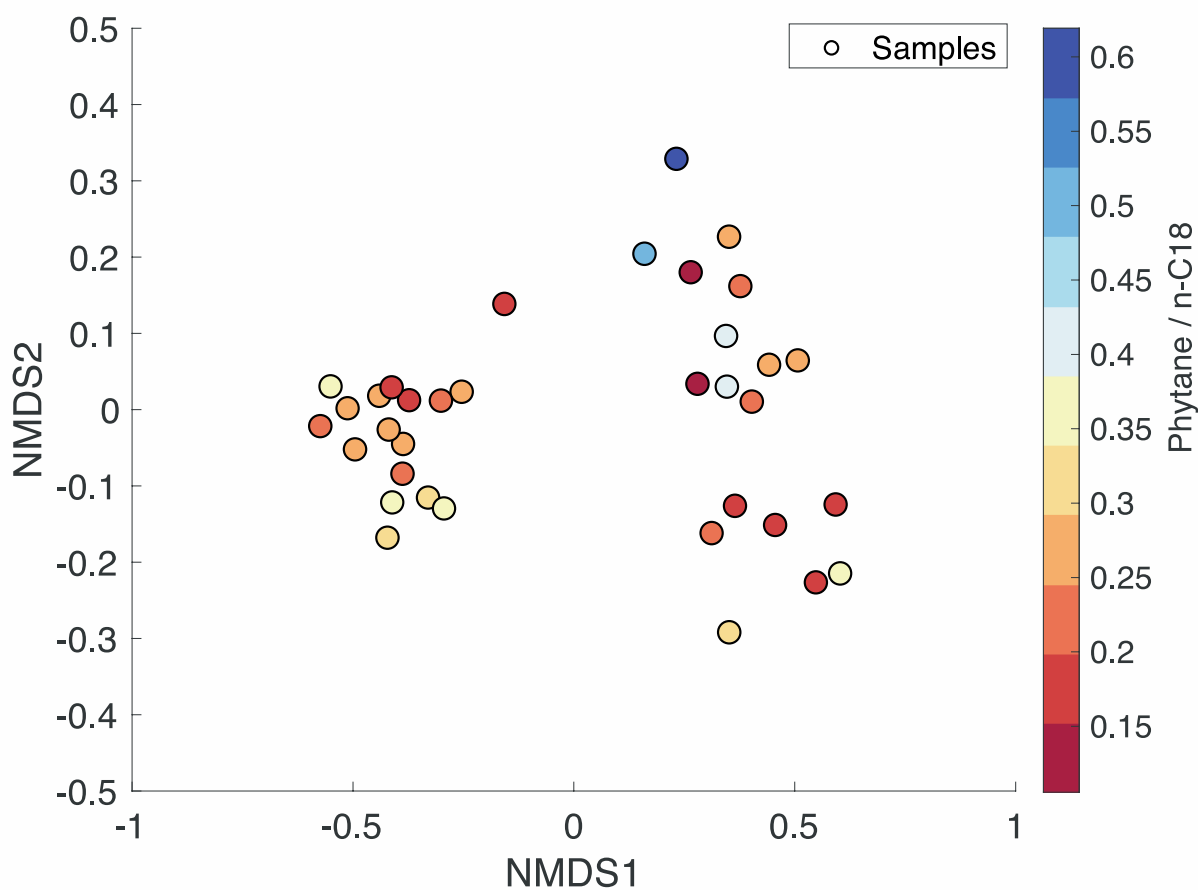

1192  
 1193 **Supplemental Figure S46.** Q mode NMDS results colored by the Phytane / *n*-C<sub>18</sub> (Ph/18) value  
 1194 of each sample. Only samples are displayed. The Ph/18 ratio is higher (cool colors) in more  
 1195 biodegraded samples and lower (warm colors) in less biodegraded samples, as isoprenoids (such  
 1196 as phytane) are less biodegradable than alkanes. We do not observe any association between the  
 1197 Ph/18 biodegradation index and NMDS1. Thus, we conclude that transport, and not  
 1198 biodegradation of samples, is what controls sample distribution along NMDS1.

1199  
 1200  
 1201  
 1202  
 1203



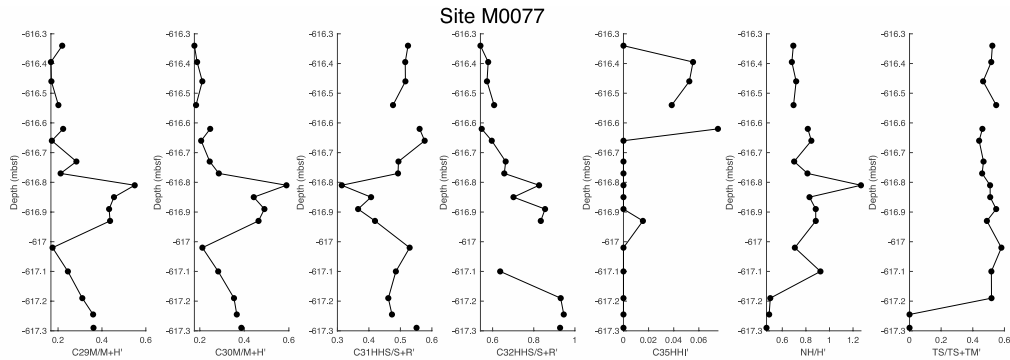

1204  
1205  
1206  
1207  
1208  
1209  
1210  
1211

**Supplemental Figure S47.** Thermal maturity indices from Chicxulub Site M0077. C<sub>29</sub> Moretane / Moretane + Hopane (C<sub>29</sub>M/M+H) and C<sub>30</sub> Moretane / Moretane + Hopane (C<sub>30</sub> M/M+H) decrease with increasing thermal maturity. C<sub>31</sub> homohopane S / S + R (C<sub>31</sub>HHS/S+R), C<sub>32</sub> homohopane S / S + R (C<sub>32</sub>HHS/S+R), C<sub>35</sub> Homohopane Index (C<sub>35</sub> HHI), Norhopane / Hopane (NH/H), and T<sub>s</sub> / T<sub>s</sub> + T<sub>m</sub> (TS/TS+TM) increase with increasing thermal maturity.

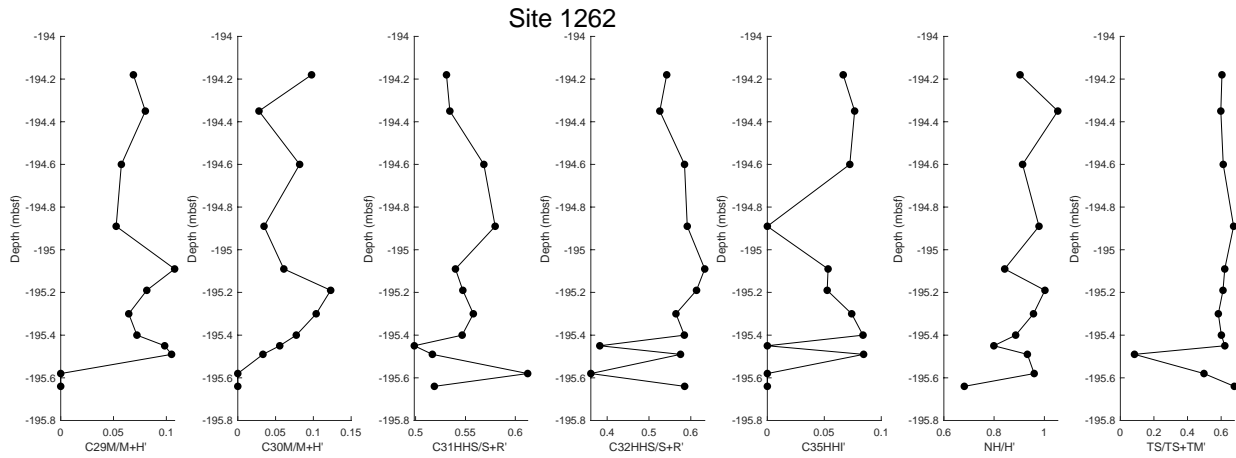

1212  
1213  
1214  
1215  
1216  
1217  
1218

**Supplemental Figure S48.** Thermal maturity indices from Walvis Ridge Site 1262. C<sub>29</sub> Moretane / Moretane + Hopane (C<sub>29</sub>M/M+H) and C<sub>30</sub> Moretane / Moretane + Hopane (C<sub>30</sub> M/M+H) decrease with increasing thermal maturity. C<sub>31</sub> homohopane S / S + R (C<sub>31</sub>HHS/S+R), C<sub>32</sub> homohopane S / S + R (C<sub>32</sub>HHS/S+R), C<sub>35</sub> Homohopane Index (C<sub>35</sub> HHI), Norhopane / Hopane (NH/H), and T<sub>s</sub> / T<sub>s</sub> + T<sub>m</sub> (TS/TS+TM) increase with increasing thermal maturity.

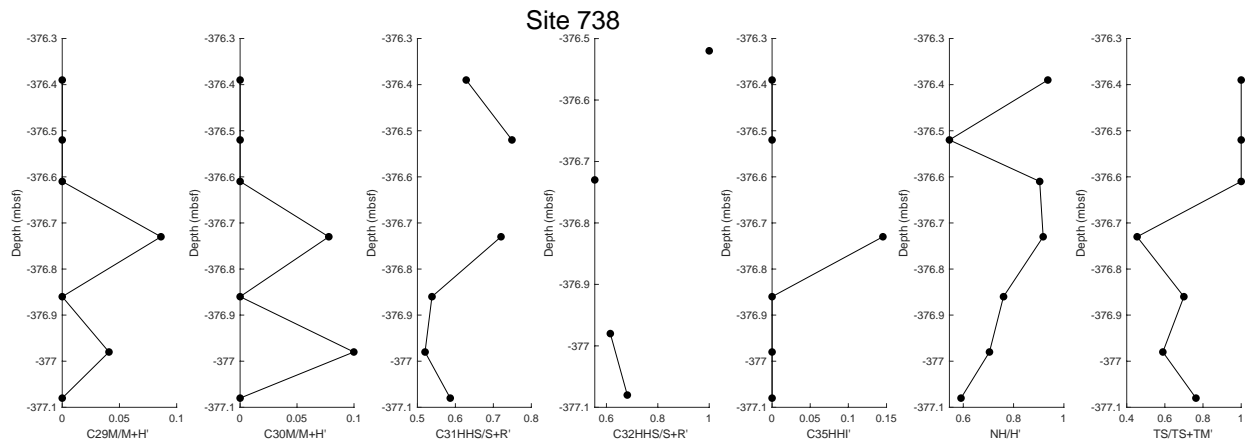

1219  
1220  
1221  
1222  
1223  
1224  
1225

**Supplemental Figure S49.** Thermal maturity indices from Kerguelen Plateau Site 738.  $C_{29}$  Moretane / Moretane + Hopane ( $C_{29}M/M+H$ ) and  $C_{30}$  Moretane / Moretane + Hopane ( $C_{30}M/M+H$ ) decrease with increasing thermal maturity.  $C_{31}$  homohopane  $S/S+R$  ( $C_{31}HHS/S+R$ ),  $C_{32}$  homohopane  $S/S+R$  ( $C_{32}HHS/S+R$ ),  $C_{35}$  Homohopane Index ( $C_{35}HHI$ ), Norhopane / Hopane ( $NH/H$ ), and  $T_s / T_s + T_m$  ( $TS/TS+TM$ ) increase with increasing thermal maturity.

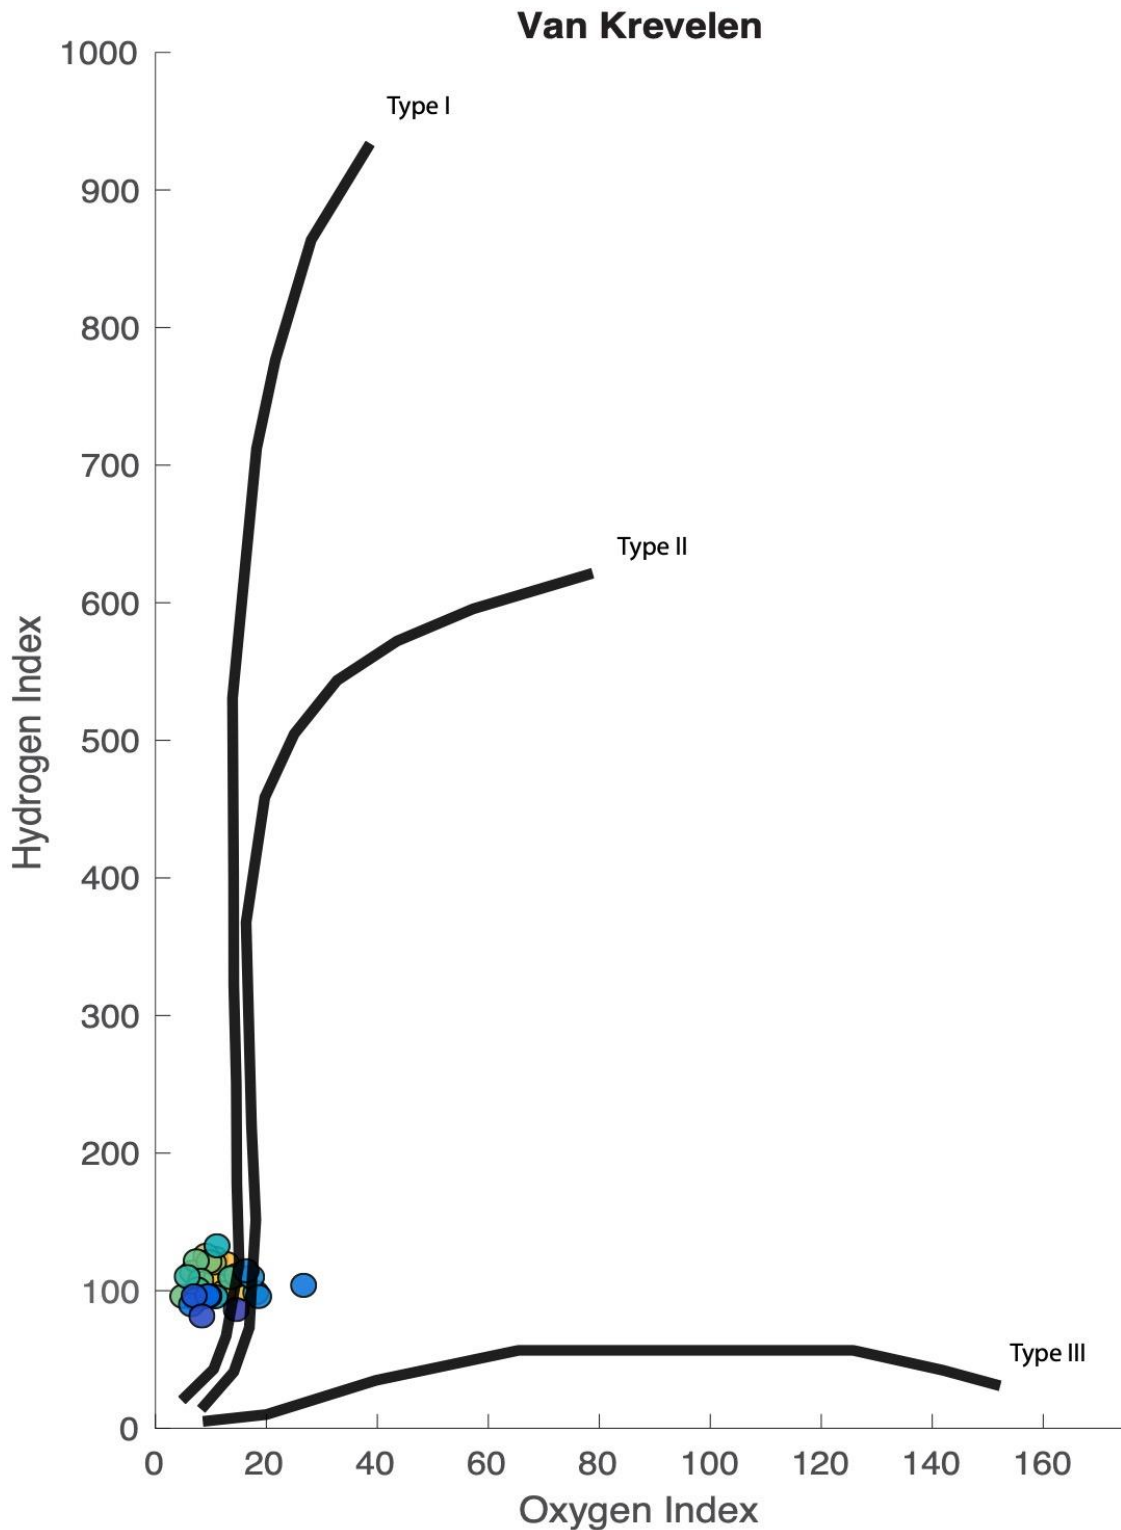

1226  
 1227  
 1228  
 1229  
 1230  
 1231

**Supplemental figure S50.** Van Krevelen diagram of samples from Chicxulub Site M0077 with contours of Type I, II, and III kerogen. The low Oxygen Index coupled with a low Hydrogen Index may be a function of thermally altered (i.e. thermally matured) Type I/II kerogen.

1232 **Supplemental Dataset 1.** Biomarker data from Sites M0077 (Chicxulub), 1262 (Walvis Ridge),  
1233 and 738 (Kerguelen Plateau) collected in this study.

1234  
1235 **Supplemental Dataset 2.** PAH integration data used for Q mode NMDS.

1236  
1237 **Supplemental Dataset 3.** Q mode NMDS loadings of samples and variables (PAHs) based on  
1238 PAH composition of samples from Sites M0077, 738, and 1262.

1239  
1240 **Supplemental Dataset 4.** APDI calculations and values for samples from site M0077, 738, and  
1241 1262. APDI is calculated for the homologous series of phenanthrenes, pyrenes, and chrysenes.  
1242 Values highlighted in yellow were deemed low quality and should not be interpreted.

1243  
1244 **Supplemental Dataset 5.** Properties of PAHs measured within this study that were further  
1245 analyzed alongside NDMS data.

1246  
1247

## 1248 **References**

- 1249 1. S. Gulick, *et al.*, Expedition 364 Preliminary Report: Chicxulub: drilling the K-Pg impact  
1250 crater. *Int. Ocean Discov. Progr.*, 38 (2017).
- 1251 2. S. P. S. Gulick, *et al.*, The first day of the Cenozoic. *Proc. Natl. Acad. Sci.*, 201909479  
1252 (2019).
- 1253 3. T. J. Bralower, *et al.*, Origin of a global micrite layer in the aftermath of the Cretaceous-  
1254 Paleogene boundary impact. *Earth. Planet. Sci. Lett. In Press*.
- 1255 4. S. Goderis, *et al.*, The final settling of meteoritic matter on the peak-ring of the Chicxulub  
1256 impact structure in Core M0077A of IODP-ICDP Expedition 364 in *Large Meteorite*  
1257 *Impacts and Planetary Evolution IV*, (2019), pp. 13–14.
- 1258 5. C. M. Lowery, *et al.*, Rapid recovery of life at ground zero of the end- Cretaceous mass  
1259 extinction The Cretaceous/Palaeogene mass extinction. *Nature* **558**, 288–291 (2018).
- 1260 6. H. R. Thierstein, The Cretaceous/Tertiary boundary at Site 738, southern Kerguelen  
1261 Plateau. *Proc., Sci. results, ODP, Leg 119, Kerguelen Plateau-Prydz Bay*, 849–867  
1262 (1991).
- 1263 7. B. T. Huber, “Maestrichtian planktonic foraminifer biostratigraphy and the  
1264 Cretaceous/Tertiary boundary at Hole 738C (Kerguelen Plateau, southern Indian Ocean)”  
1265 in *Proc., Scientific Results, ODP, Leg 119, Kerguelen Plateau-Prydz Bay*, (1991), pp.  
1266 451–465.
- 1267 8. J. J. Pospichal, B. T. Huber, The Cretaceous/Tertiary boundary in the southern Indian  
1268 Ocean: results from the coring operations of the Ocean Drilling Program. *Am. Geophys.*  
1269 *Union Geophys. Monogr. Ser.* **70**, 275–294 (1992).
- 1270 9. H. R. Thierstein, *et al.*, The Cretaceous/Tertiary boundary at Site 738, southern Kerguelen  
1271 Plateau. *Proc. Ocean Drill. Program, Sci. Results* **119**, 849–867 (1991).
- 1272 10. B. T. Huber, Evidence for planktonic foraminifer reworking versus survivorship across the  
1273 Cretaceous-Tertiary boundary at high latitudes. *Spec. Pap. Geol. Soc. Am.* **307**, 319–334  
1274 (1996).
- 1275 11. J. C. Zachos, D. Kroon, P. Blum, “Site 1262” Proc. Ocean Drill. Program Initial. Rep. 208  
1276 (2004).
- 1277 12. G. Ravizza, D. Vonderhaar, A geochemical clock in earliest Paleogene pelagic carbonates

- 1278 based on the impact-induced Os isotope excursion at the Cretaceous-Paleogene boundary.  
 1279 *Paleoceanography* **27**, 1–15 (2012).
- 1280 13. T. J. Goldin, H. J. Melosh, Self-shielding of thermal radiation by Chicxulub impact ejecta:  
 1281 Firestorm or fizzle? *Geology* **37**, 1135–1138 (2009).
- 1282 14. R. Tagle, *et al.*, Platinum group elements in impactites of the ICDP Chicxulub drill core  
 1283 Yaxcopoil-1: Are there traces of the projectile? *Meteorit. Planet. Sci.* **39**, 1009–1016  
 1284 (2004).
- 1285 15. T. Kenkmann, A. Wittmann, D. Scherler, Structure and impact indicators of the  
 1286 Cretaceous sequence of the ICDP drill core Yaxcopoil-1, Chicxulub impact crater,  
 1287 Mexico. *Meteorit. Planet. Sci.* **39**, 1069–1088 (2004).
- 1288 16. M. C. Harvey, S. C. Brassell, C. M. Belcher, A. Montanari, Combustion of fossil organic  
 1289 matter at the Cretaceous-Paleogene (K-P) boundary. *Geology* **36**, 355–358 (2008).
- 1290 17. J. Morgan, N. Artemieva, T. Goldin, Revisiting wildfires at the K-Pg boundary. *J.*  
 1291 *Geophys. Res. Biogeosciences* **118**, 1508–1520 (2013).
- 1292 18. C. M. Belcher, M. E. Collinson, A. C. Scott, Constraints on the thermal energy released  
 1293 from the Chicxulub impactor: new evidence from multi-method charcoal analysis. *J. Geol.*  
 1294 *Soc. London.* **162**, 591–602 (2005).
- 1295 19. T. Arinobu, R. Ishiwatari, K. Kaiho, M. A. Lamolda, Spike of pyrosynthetic polycyclic  
 1296 aromatic hydrocarbons associated with an abrupt decrease in  $\delta^{13}\text{C}$  of a terrestrial  
 1297 biomarker at the Cretaceous-Tertiary boundary at Caravaca, Spain. *Geology* **27**, 723–726  
 1298 (1999).
- 1299 20. M. I. Venkatesan, J. Dahl, Organic geochemical evidence for global fires at the  
 1300 cretaceous/tertiary boundary. *Nature* **338**, 57–60 (1989).
- 1301 21. K. Kaiho, *et al.*, Global climate change driven by soot at the K-Pg boundary as the cause  
 1302 of the mass extinction. *Sci. Rep.* **6**, 1–13 (2016).
- 1303 22. M. M. R. Mostert, G. A. Ayoko, S. Kokot, Application of chemometrics to analysis of soil  
 1304 pollutants. *Trends Anal. Chem.* **29**, 430–445 (2010).
- 1305 23. T. D. Bucheli, F. Blum, A. Desaulles, Ö. Gustafsson, Polycyclic aromatic hydrocarbons,  
 1306 black carbon, and molecular markers in soils of Switzerland. *Chemosphere* **56**, 1061–1076  
 1307 (2004).
- 1308 24. A. I. Holman, K. Grice, C. M. B. Jaraula, A. Schimmelmann, Bitumen II from the  
 1309 Paleoproterozoic Here's Your Chance Pb/Zn/Ag deposit: Implications for the analysis of  
 1310 depositional environment and thermal maturity of hydrothermally-altered sediments.  
 1311 *Geochim. Cosmochim. Acta* **139**, 98–109 (2014).
- 1312 25. K. H. Williford, K. Grice, G. A. Logan, J. Chen, D. Huston, The molecular and isotopic  
 1313 effects of hydrothermal alteration of organic matter in the Paleoproterozoic McArthur  
 1314 River Pb/Zn/Ag ore deposit. *Earth Planet. Sci. Lett.* **301**, 382–392 (2011).
- 1315 26. B. R. T. Simoneit, P. F. Lonsdale, Hydrothermal petroleum in mineralized mounds at the  
 1316 seabed of Guaymas Basin. *Nature* **295**, 198–202 (1982).
- 1317 27. I. Gilmour, W. S. Wolbach, E. Anders, “Major wildfires at the Cretaceous-Tertiary  
 1318 boundary” in *Catastrophes and Evolution: Astronomical Foundations*, S. V. M. Clube,  
 1319 Ed. (Cambridge University Press, 1990), pp. 195–213.
- 1320 28. S. D. Killops, V. J. Killops, *Introduction to organic geochemistry* (John Wiley & Sons,  
 1321 Ltd, 2013).
- 1322 29. S. Pal, J. P. Shrivastava, S. K. Mukhopadhyay, Polycyclic aromatic hydrocarbon  
 1323 compound excursions and K/Pg transition in the late Cretaceous-early Palaeogene

- 1324 succession of the Um Sohryngkew river section, Meghalaya. *Curr. Sci.* **109**, 1140–1150  
 1325 (2015).
- 1326 30. W. S. Wolbach, R. S. Lewis, E. Anders, Cretaceous extinctions: evidence for wildfires  
 1327 and search for meteoric material. *Science* (80-. ). **230**, 167–170 (1985).
- 1328 31. W. S. Wolbach, I. Gilmour, E. Anders, C. J. Orth, R. R. Brooks, Global fire at the  
 1329 Cretaceous-Tertiary boundary. *Nature* **334**, 665–669 (1988).
- 1330 32. E. Stogiannidis, R. Laane, Source characterization of polycyclic aromatic hydrocarbons by  
 1331 using their molecular indices: An overview of possibilities. *Rev. Environ. Contam.*  
 1332 *Toxicol.* **234**, 49–133 (2015).
- 1333 33. D. Heymann, L. P. F. Chibante, R. R. Brooks, W. S. Wolbach, R. E. Smalley, Fullerenes  
 1334 in the Cretaceous-Tertiary boundary layer. *Science* (80-. ). **265**, 645–647 (1994).
- 1335 34. V. V. Shuvalov, N. A. Artemieva, Numerical modeling of Tunguska-like impacts. *Planet.*  
 1336 *Space Sci.* **50**, 181–192 (2002).
- 1337 35. T. Salge, H. Stosnach, G. Rosatelli, L. Hecht, W. U. Reimold, Evidence for shock-induced  
 1338 anhydrite recrystallization and decomposition at the UNAM-7 drill core from the  
 1339 Chicxulub impact structure. *Meteorit. Planet. Sci.* **2356**, 2334–2356 (2019).
- 1340 36. H. Mita, A. Shimoyama, Distribution of polycyclic aromatic hydrocarbons in the K/T  
 1341 boundary sediments at Kawaruppu, Hokkaido, Japan. *Geochem. J.* **33**, 305–315 (1999).
- 1342 37. M. A. Kruege, B. A. Stankiewicz, J. C. Crelling, A. Montanari, D. F. Bensley, Fossil  
 1343 charcoal in Cretaceous-Tertiary boundary strata: Evidence for catastrophic firestorm and  
 1344 megawave. *Geochim. Cosmochim. Acta* **58**, 1393–1397 (1994).
- 1345 38. C. M. Belcher, Reigniting the Cretaceous-Palaeogene firestorm debate. *Geology* **37**,  
 1346 1147–1148 (2009).
- 1347 39. K. Kaiho, *et al.*, Global climate change driven by soot at the K-Pg boundary as the cause  
 1348 of the mass extinction. *Sci. Rep.* **6**, 28427 (2016).
- 1349 40. D. Heymann, *et al.*, Geochemical markers of the Cretaceous-Tertiary boundary event at  
 1350 Brazos River, Texas, USA. *Geochim. Cosmochim. Acta* **62**, 173–181 (1998).
- 1351 41. W. S. Wolbach, “Carbon across the Cretaceous-Tertiary boundary.” Dissertation.  
 1352 University of Chicago, Department of Chemistry (1990).
- 1353 42. W. S. Wolbach, I. Gilmour, E. Anders, “Major wildfires at the Cretaceous/Tertiary  
 1354 boundary” in *Global Catastrophes in Earth History; An Interdisciplinary Conference on*  
 1355 *Impacts, Volcanism, and Mass Mortality*, V. L. Sharpton, P. D. Ward, Eds. (Geological  
 1356 Society of America, 1990).
- 1357 43. J. P. Baltrus, A. W. Wells, D. J. Fauth, J. R. Diehl, C. M. White, Characterization of  
 1358 carbon concentrates from coal-combustion fly ash. *Energy and Fuels* **15**, 455–462 (2001).
- 1359 44. N. L. Rose, E. Change, B. Way, L. Uk, W. Oap, Fly-Ash Spheres As Pollution. **91** (1996).
- 1360 45. D. S. Robertson, W. M. Lewis, P. M. Sheehan, O. B. Toon, K-Pg extinction :  
 1361 Reevaluation of the heat- fi re hypothesis. **118**, 329–336 (2013).
- 1362 46. W. Seiler, P. J. Crutzen, Estimates of Gross and Net Fluxes of Carbon Between. *Clim.*  
 1363 *Change* **2**, 207–247 (1980).
- 1364 47. L. C. Ivany, R. J. Salawitch, Carbon isotopic evidence for biomass burning at the K-T  
 1365 boundary. *Geology* **21**, 487–490 (1993).
- 1366 48. M. A. Sephton, Organic compounds in carbonaceous meteorites. *Nat. Prod. Rep.* **19**, 292–  
 1367 311 (2002).
- 1368 49. K. L. Pering, C. Ponnampereuma. Aromatic Hydrocarbons in the Murchison Meteorite  
 1369 *Science* **173**, 237–239 (2014).

- 1370 50. Z. Wang, *et al.*, Quantitative Characterization of PAHs in Burn Residue and Soot Samples  
1371 and Differentiation of Pyrogenic PAHs from Petrogenic PAHs - The 1994 Mobile Burn  
1372 Study. *Environ. Sci. Technol.* **33**, 3100–3109 (1999).
- 1373 51. A. T. Karp, A. I. Holman, P. Hopper, K. Grice, K. H. Freeman, Fire Distinguishers:  
1374 Refined interpretations of paleofire from polycyclic aromatic hydrocarbons. *Geochim.*  
1375 *Cosmochim. Acta. In Press.*
- 1376 52. B. McCune, J. B. Grace, *Analysis of Ecological Communities* (2005)  
1377 [https://doi.org/10.1016/S0022-0981\(03\)00091-1](https://doi.org/10.1016/S0022-0981(03)00091-1).
- 1378 53. K. E. Peters, C. C. Walters, J. M. Moldowan, *The Biomarker Guide vol. 1 and vol. 2*  
1379 (Cambridge University Press, 2005).
- 1380 54. M. L. Fogel, L. A. Cifuentes, “Isotope Fractionation during Primary Production” in  
1381 *Organic Geochemistry*, M. H. Engel, S. A. Macko, Eds. (Plenum Press, 1993), pp. 73–98.
- 1382 55. A. S. Mackenzie, R. L. Patience, J. R. Maxwell, Molecular parameters of maturation in  
1383 the Toarcian shales , Paris Basin , France-I . Changes in the configurations of acyclic  
1384 isoprenoid alkanes , steranes and triterpanes. *Geochim. Cosmochim. Acta* **44**, 1709–1721  
1385 (1980).
- 1386 56. A. C. Rocha, C. Palma, Source identification of polycyclic aromatic hydrocarbons in soil  
1387 sediments: Application of different methods. *Sci. Total Environ.* **652**, 1077–1089 (2019).  
1388
